# Supplementary material for: Reproducibility across single-cell RNA-seq protocols for spatial ordering analysis
Source: PubMed Central journal article supplement (PMC7521718; doi:10.1371/journal.pone.0239711), 2020-09-28

**Lect2**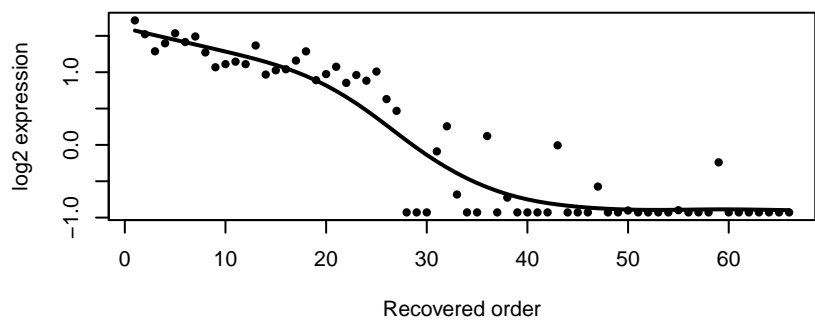**Cyp2e1**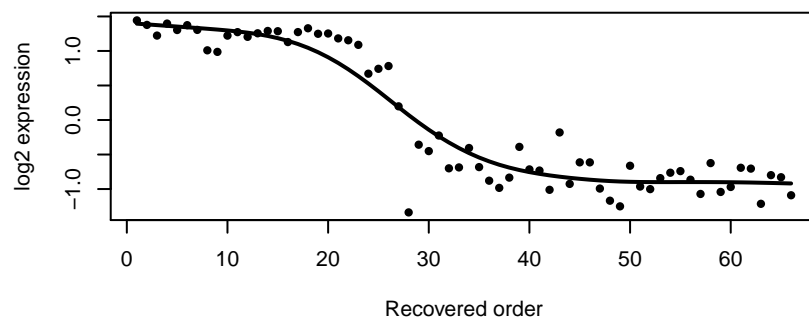**Sds**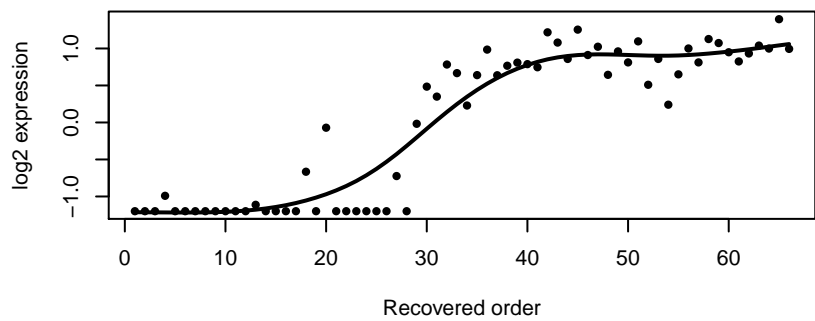**Ctsc**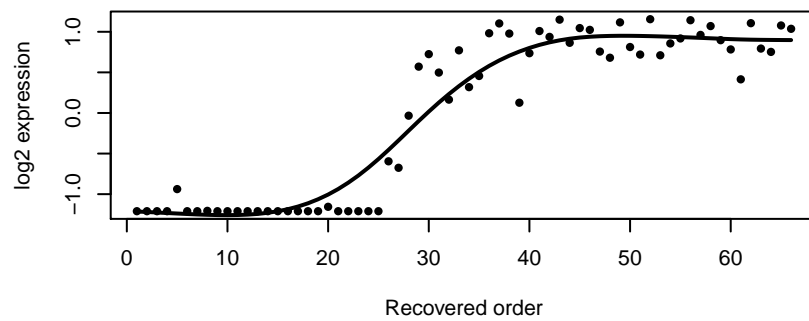**Cyp2c50**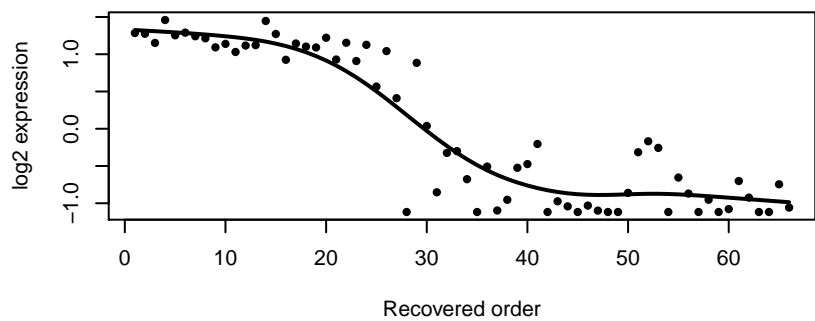**Oat**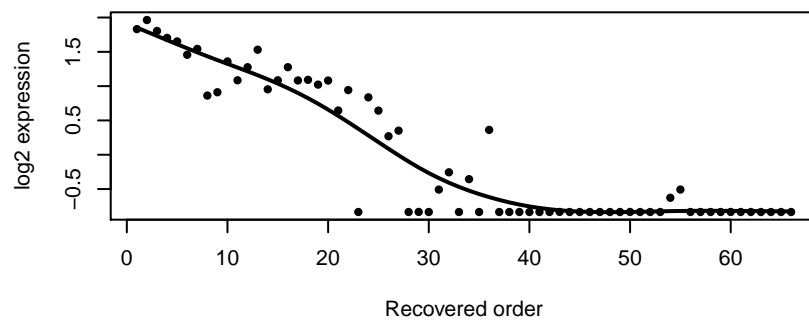**Cyp2c54**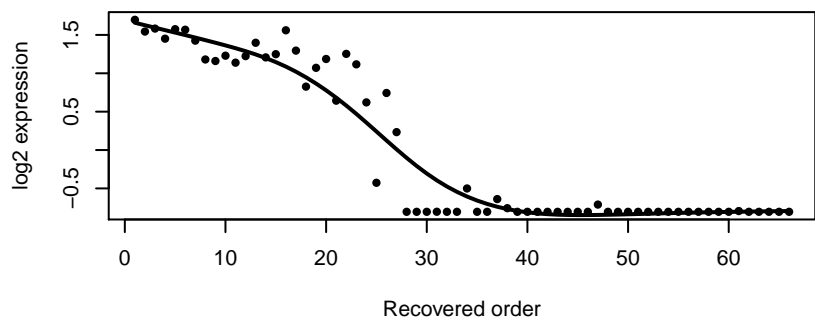**Cyp2c29**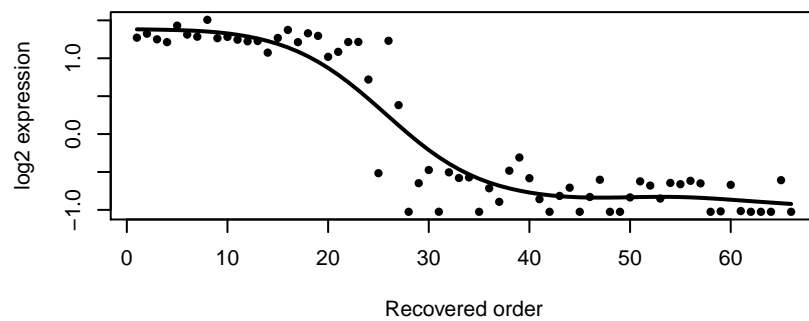**Hal**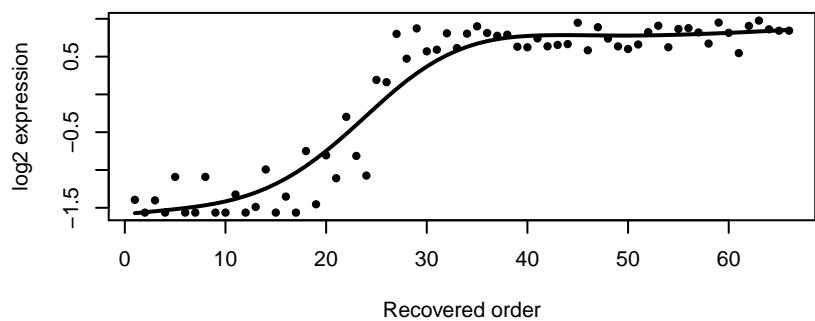**Cyp2c37**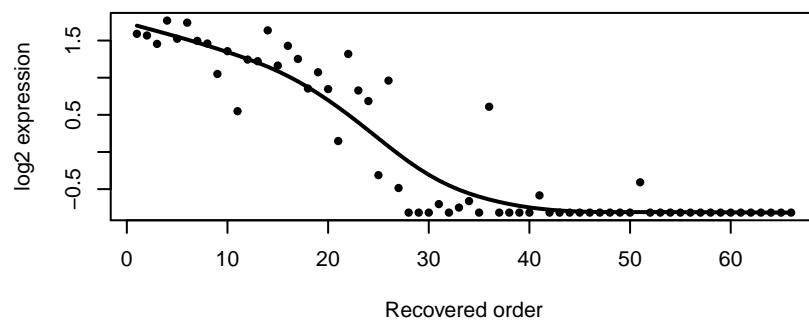

**Tbx3**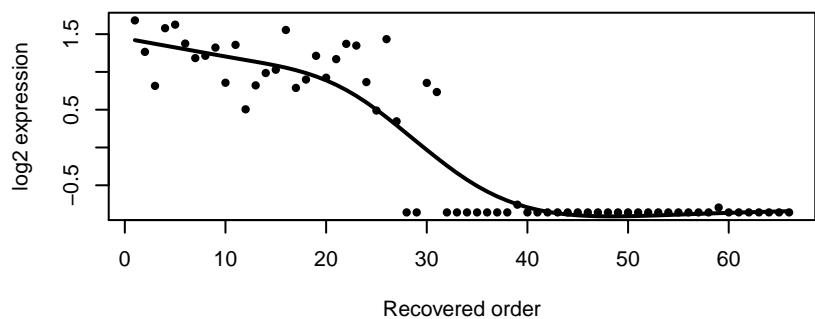**Cyp1a2**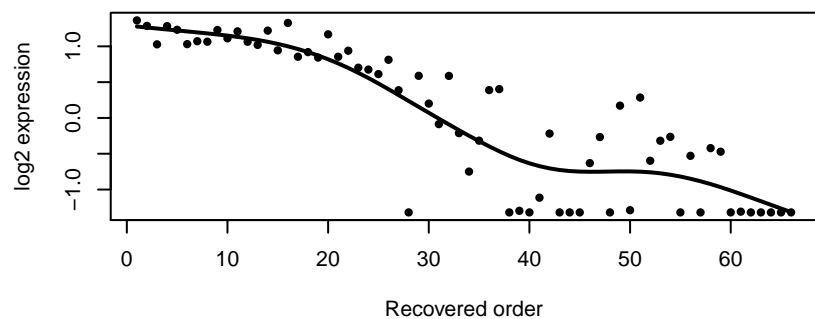**Hsd17b13**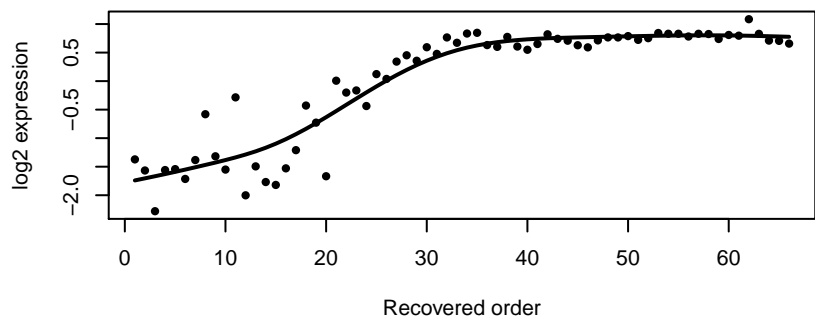**Mup19**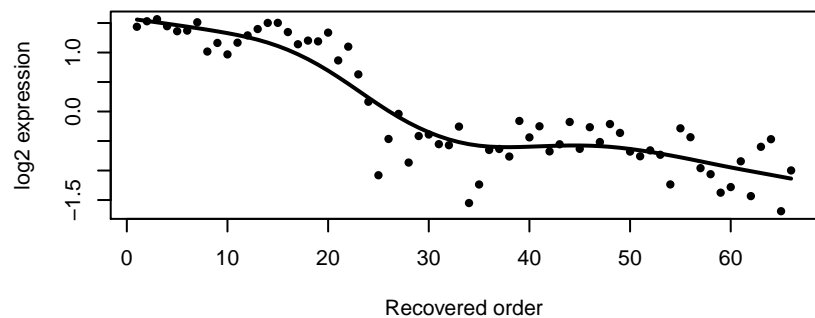**Plbd1**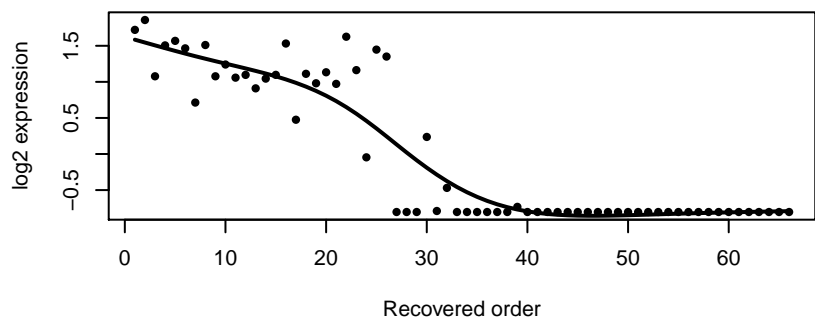**Apoc2**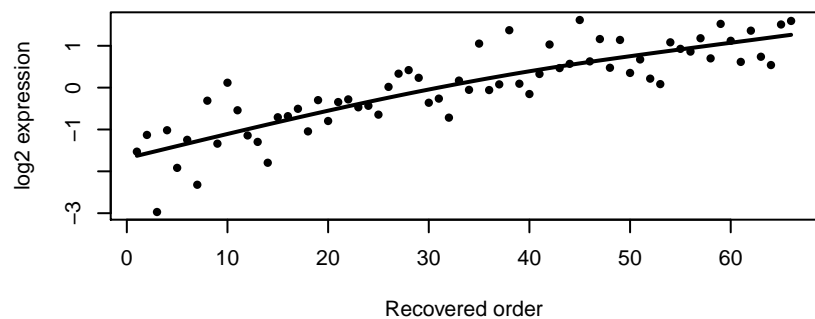**Cyp2f2**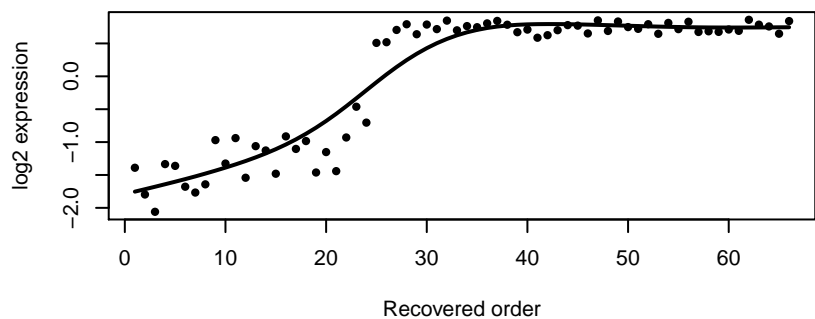**Cyp3a11**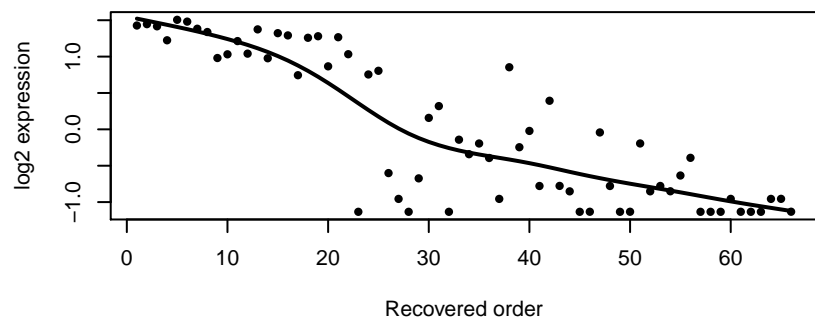**Rgn**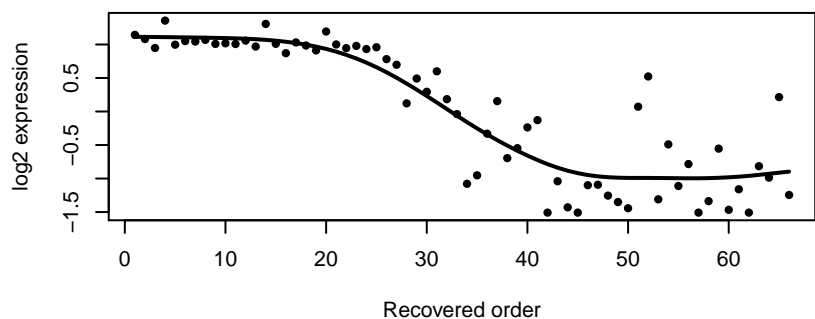**Cyp7a1**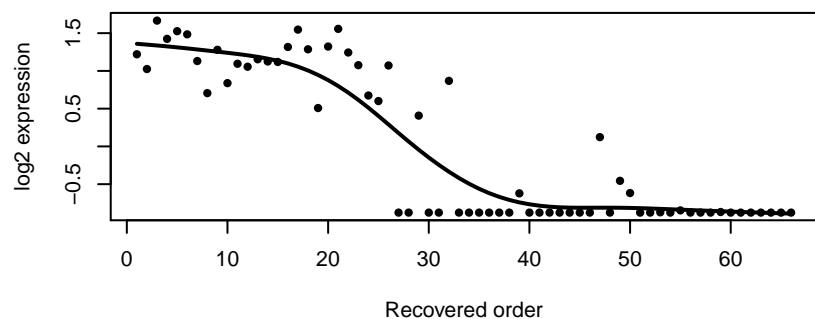

**Cdh1**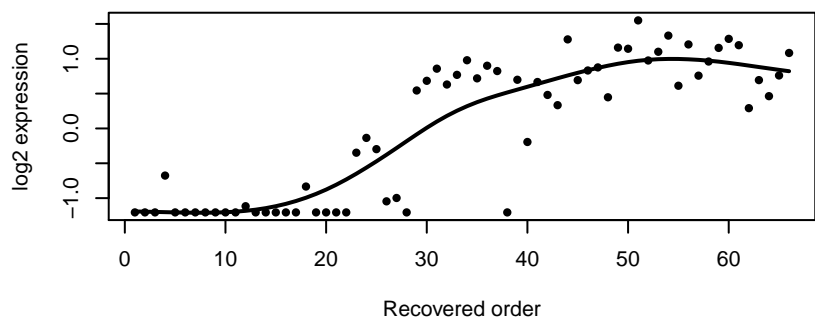**Slco1b2**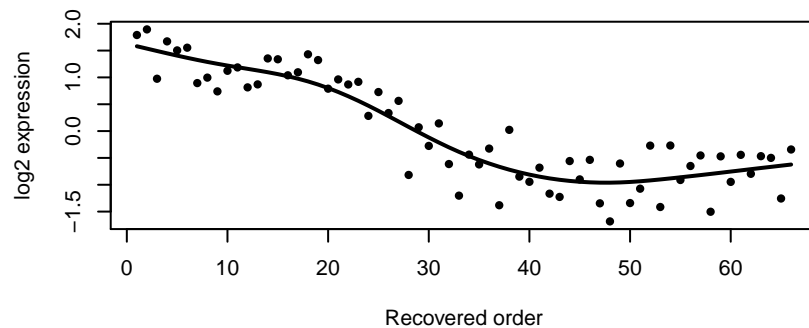**Aldh3a2**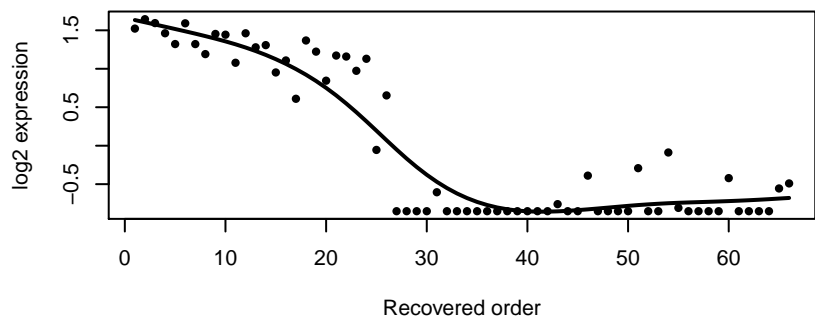**Hrsp12**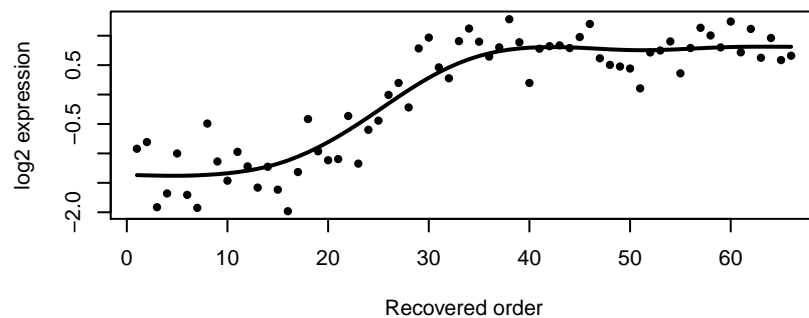**Gls2**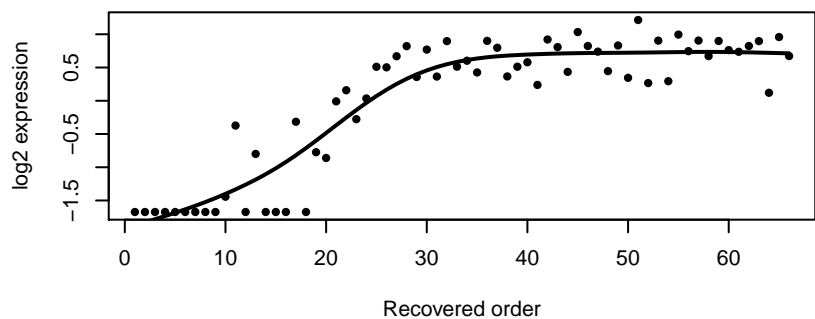**Gstm2**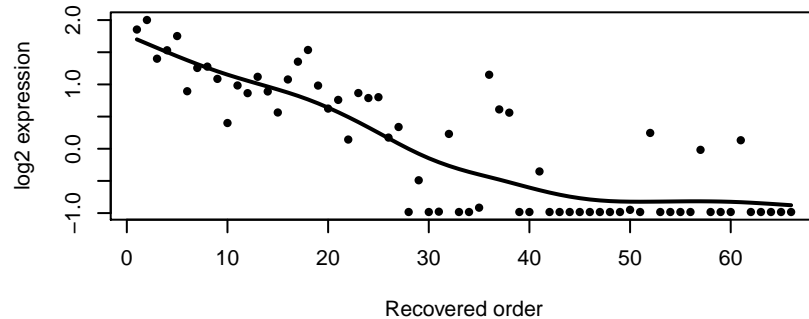**Ahr**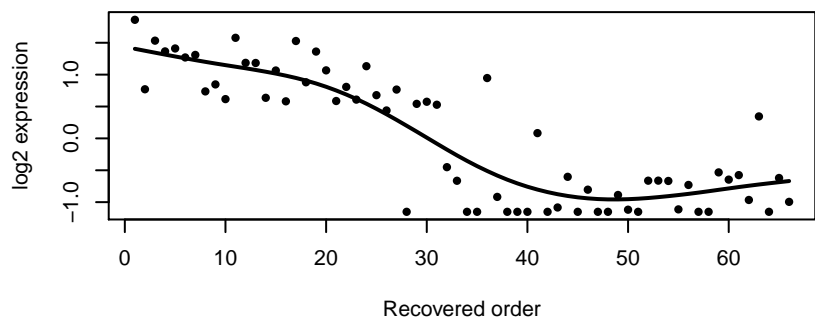**Uox**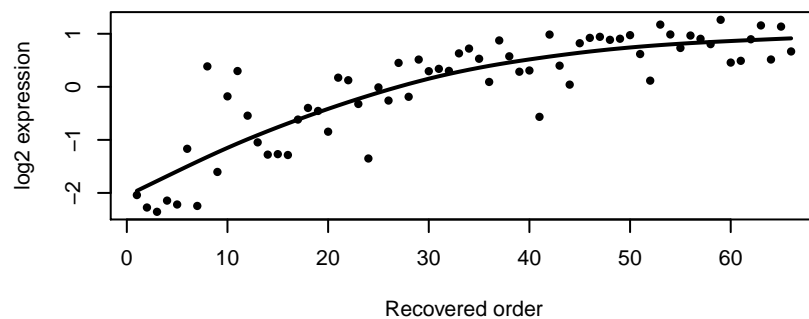**Sfxn1**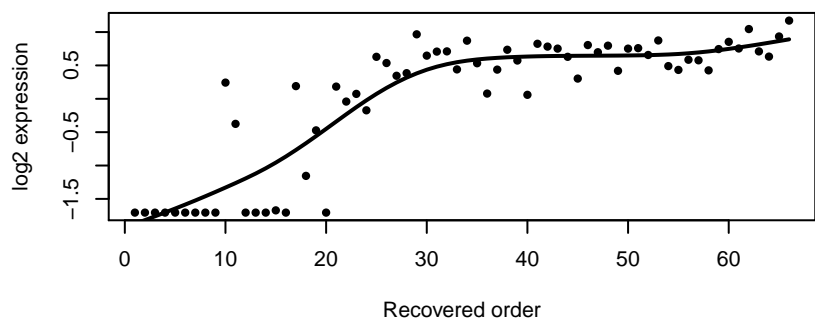**Cyb5**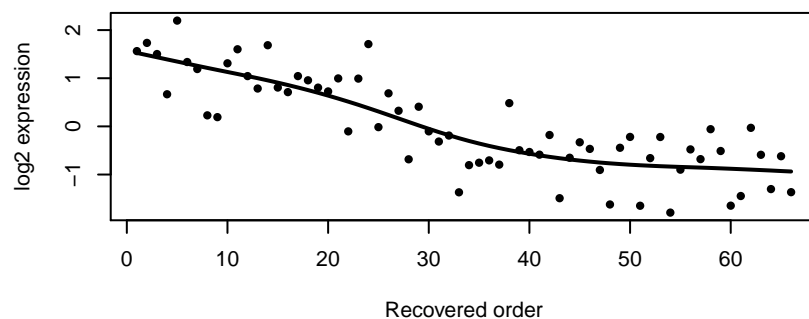

**Aldh1a1**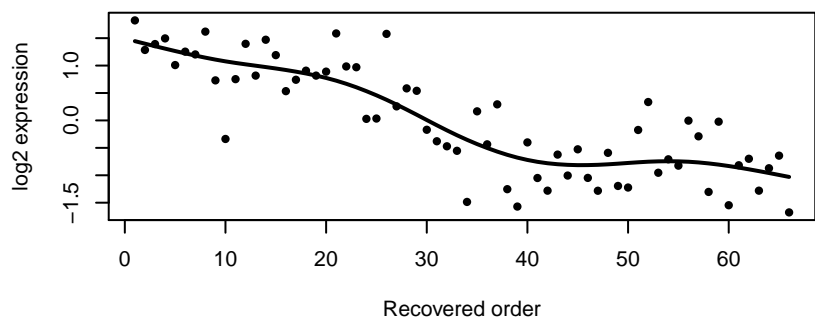**Gsta3**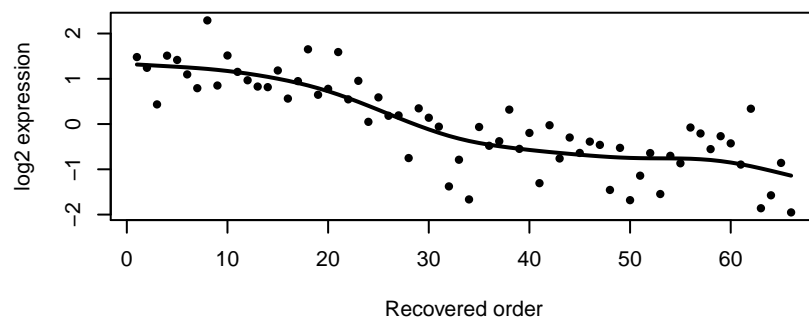**Mup17**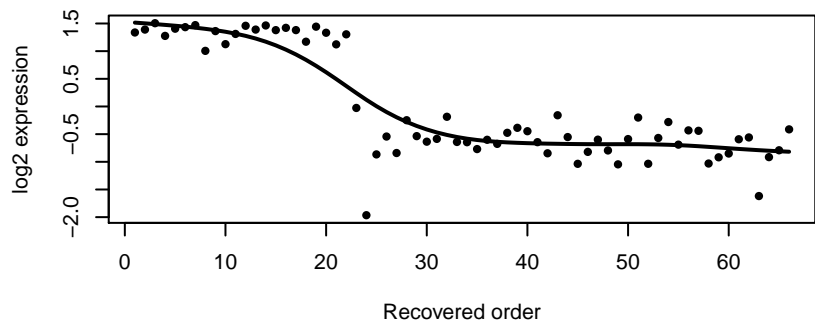**Susd4**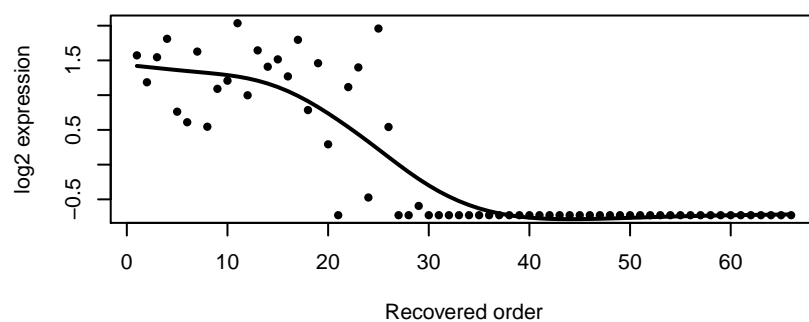**Akr1c6**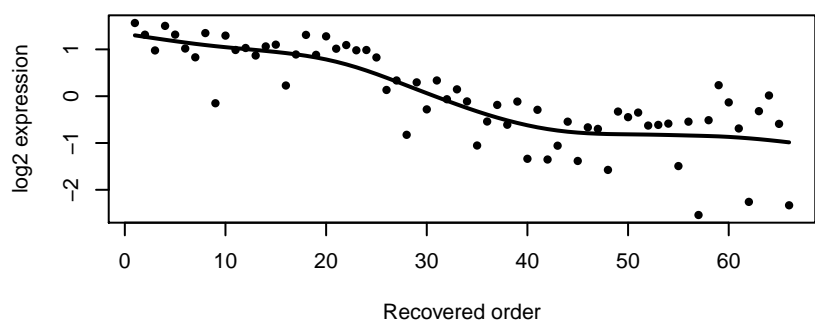**Gulo**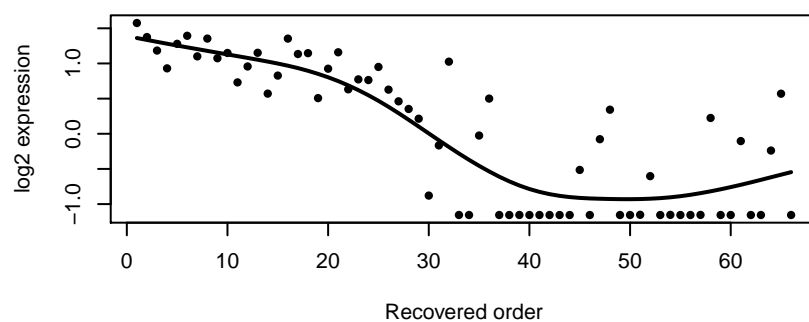**Sepp1**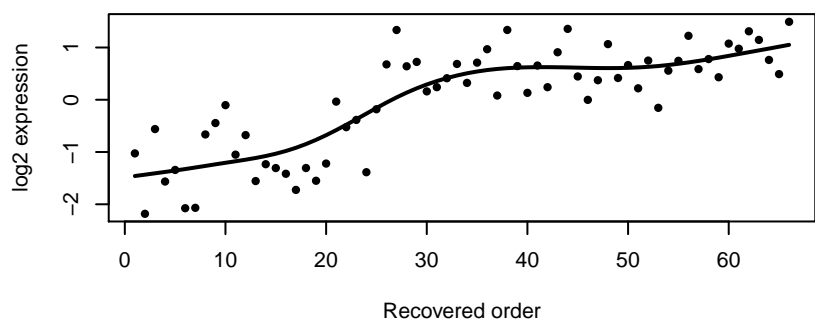**Pon1**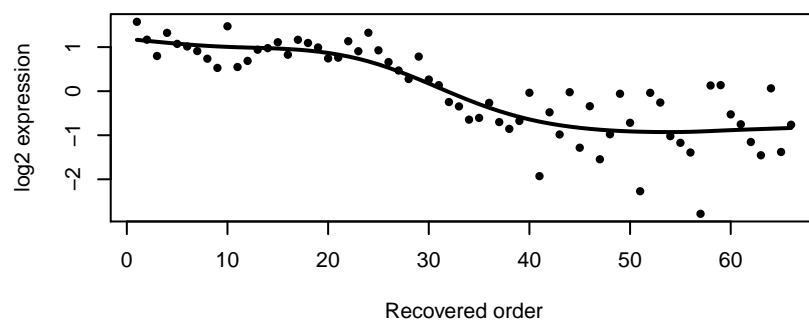**Ly6e**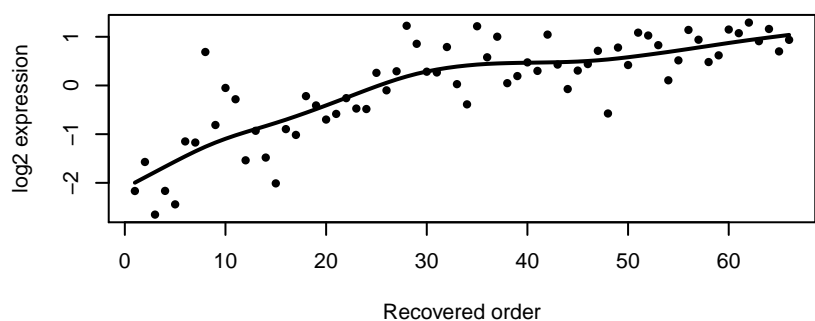**Hsd11b1**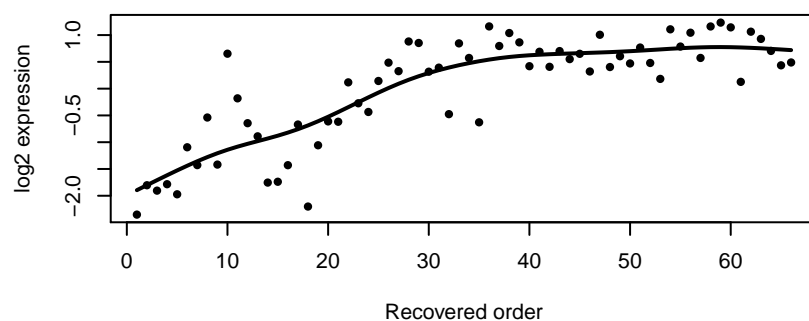

**Mup2**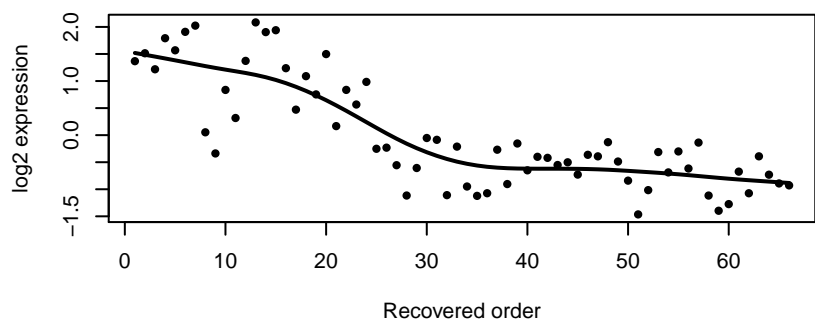**Cyp2c67**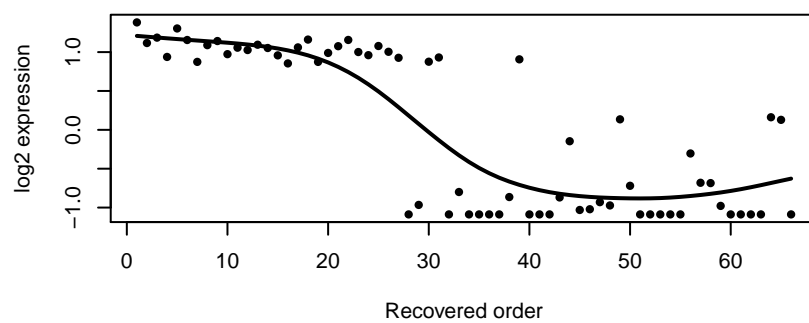**Uroc1**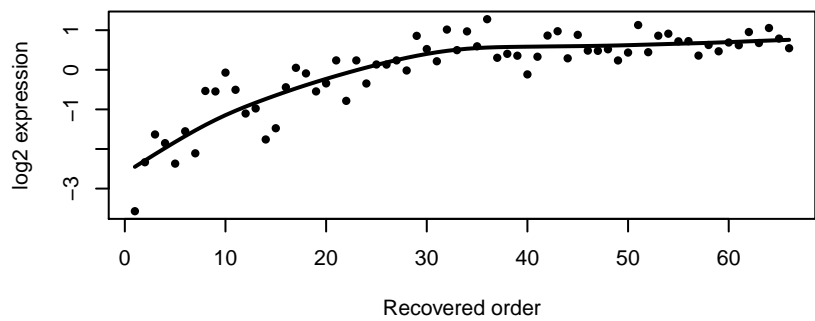**Mup15**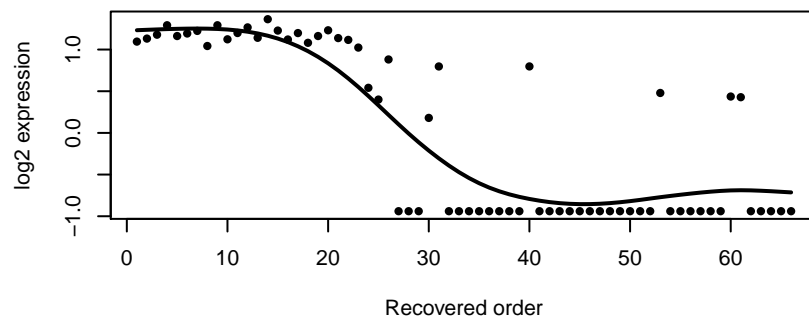**Hpx**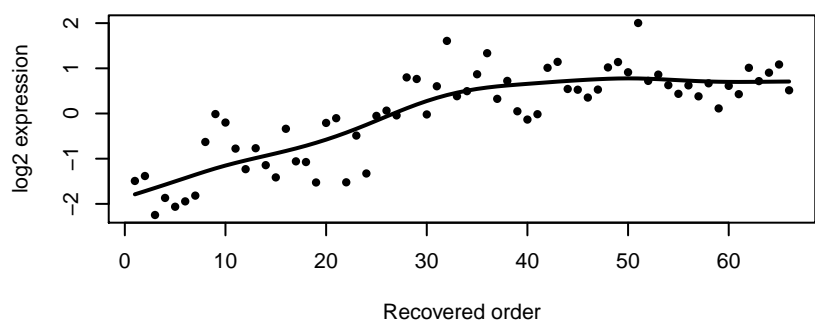**Cyp2c40**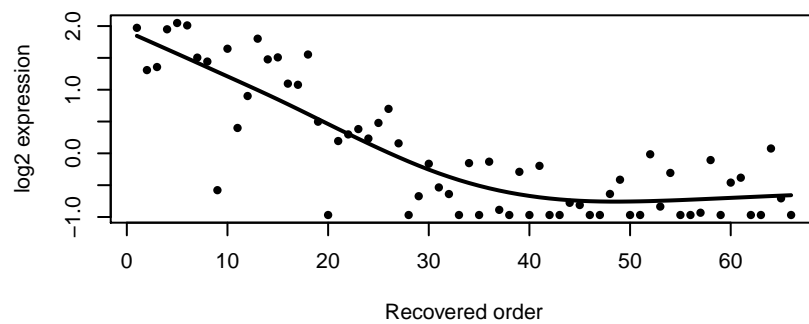**Fitm1**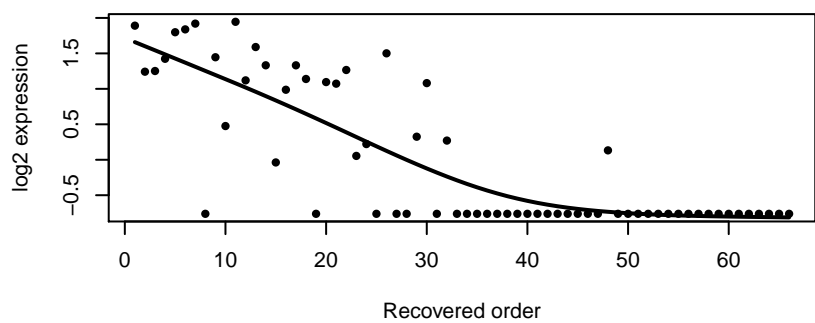**Etnpl1**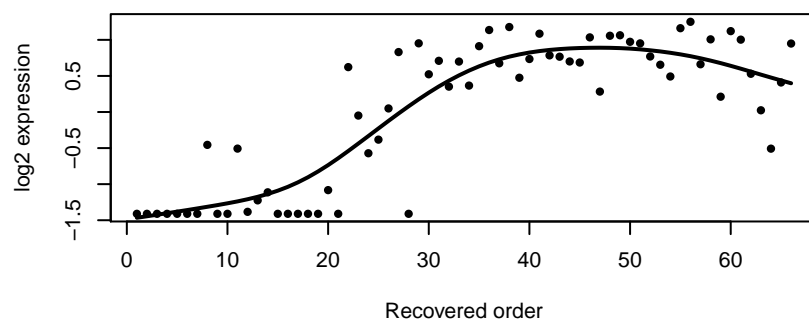**Orm1**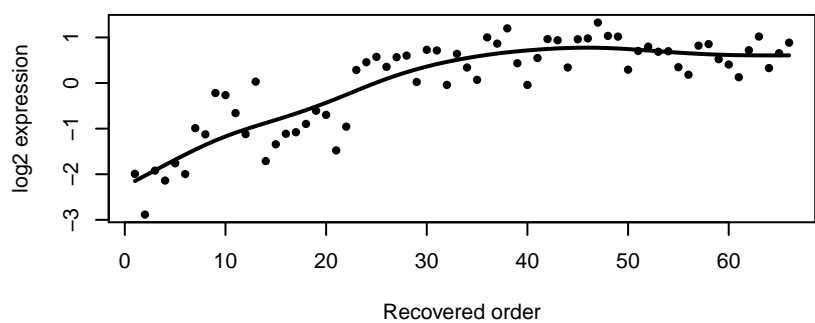**Pck1**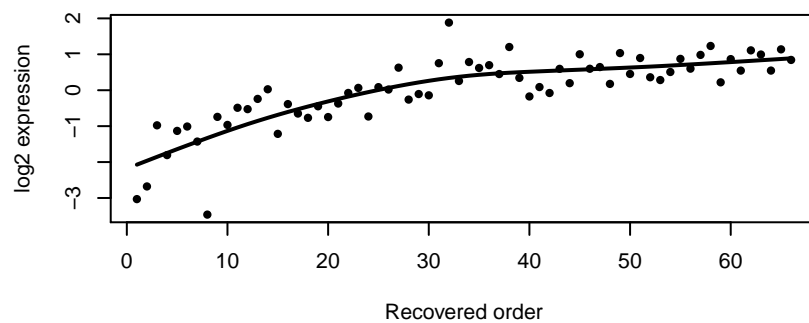

**Gc**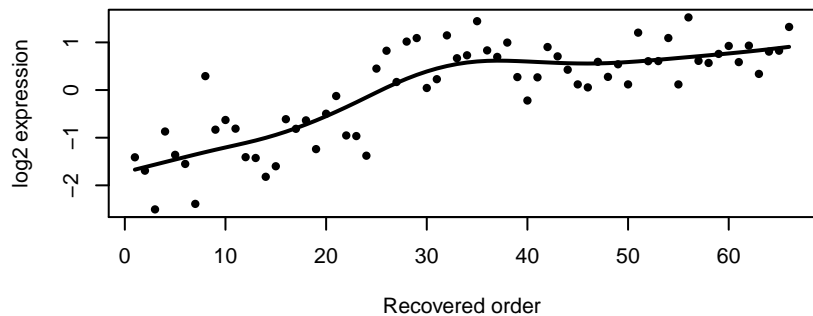**Apoc3**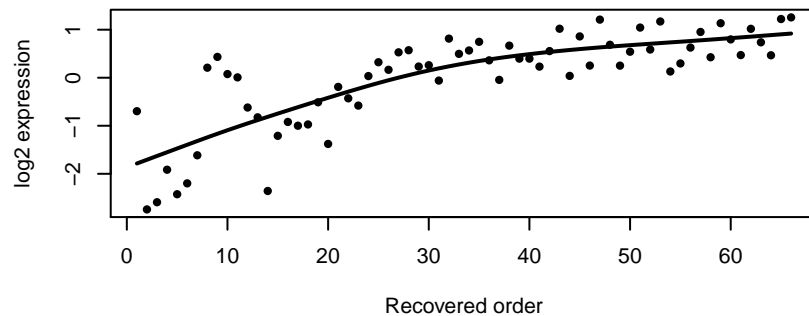**Aldob**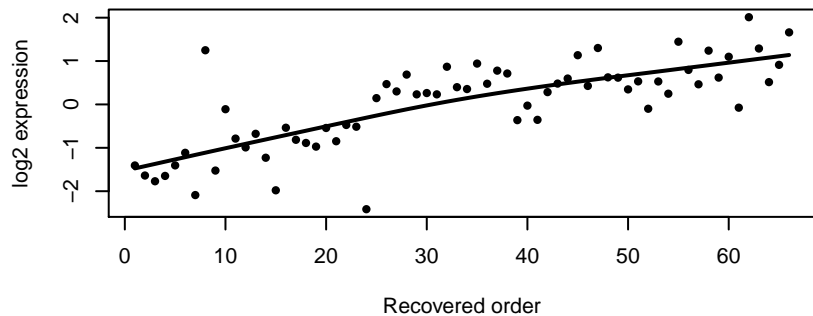**Mgst1**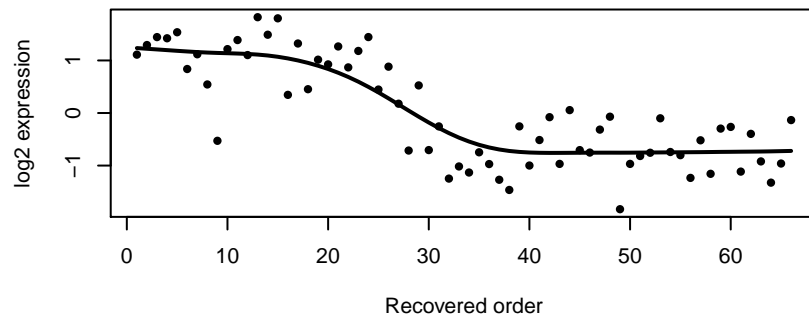**Cyp2c38**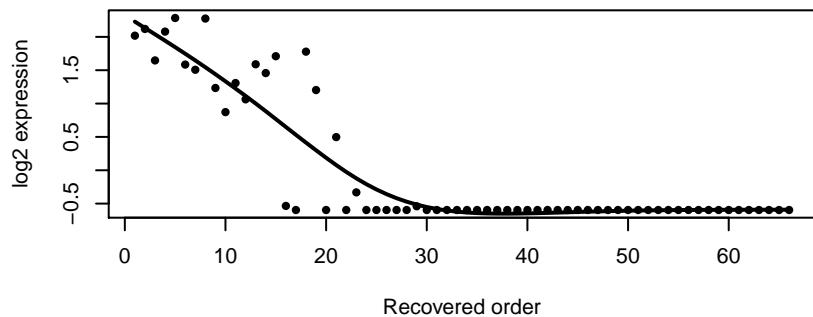**Amdhd1**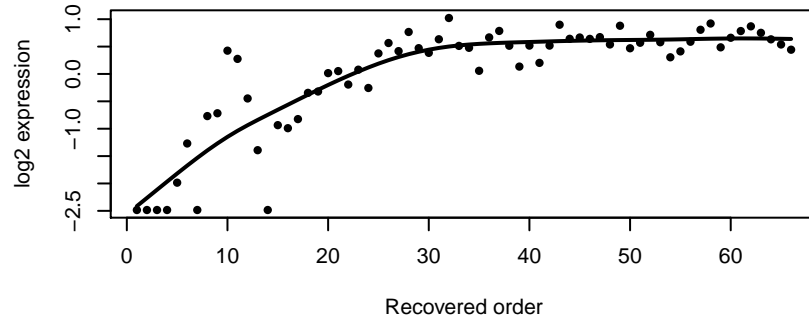**Rasgef1b**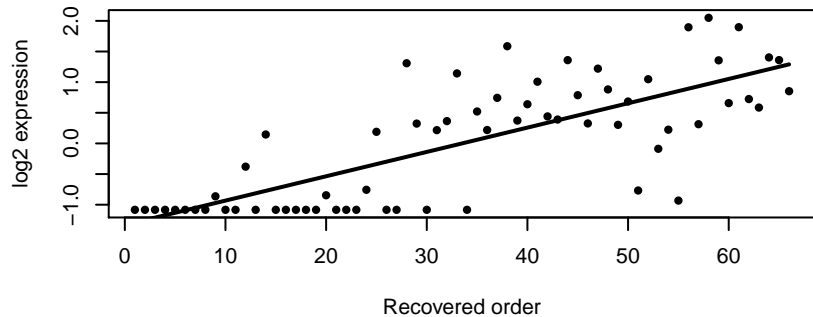**Mup3**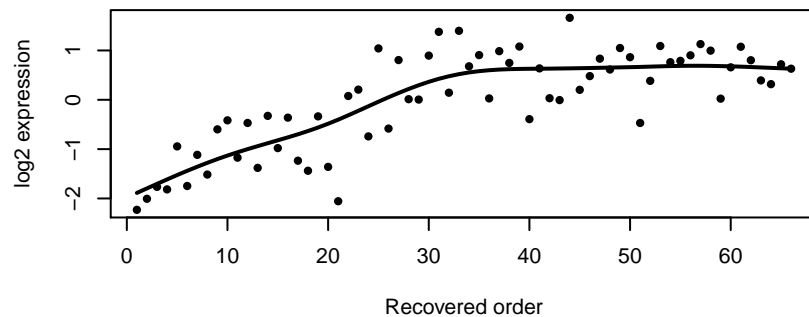**Nxpe2**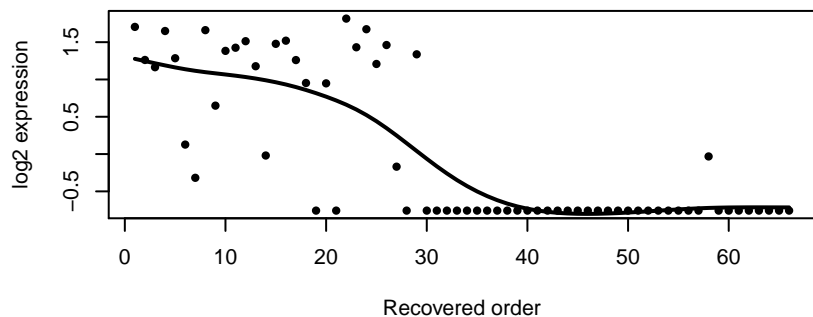**Avpr1a**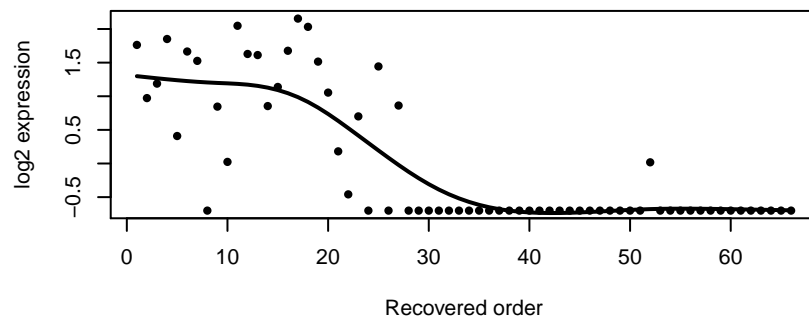

**Cyp2a5**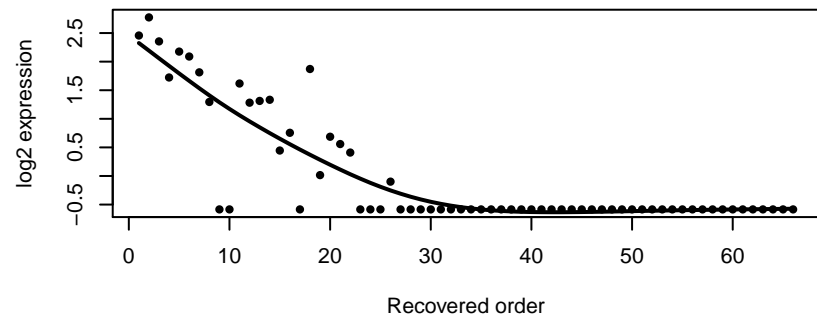**Lhpp**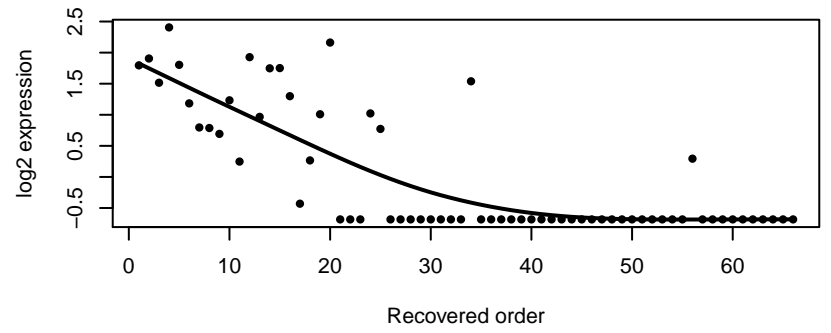**Gldc**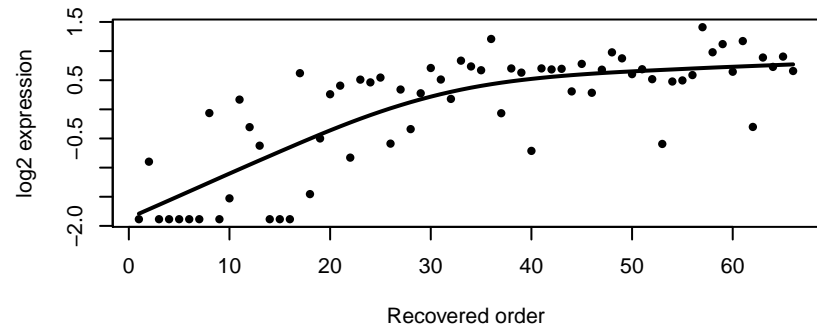**Fbp1**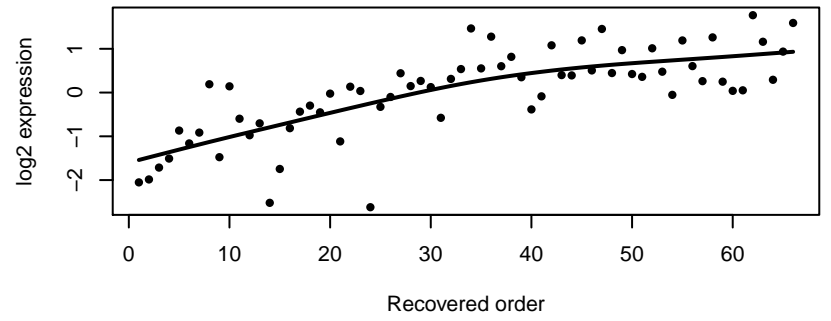**Mup20**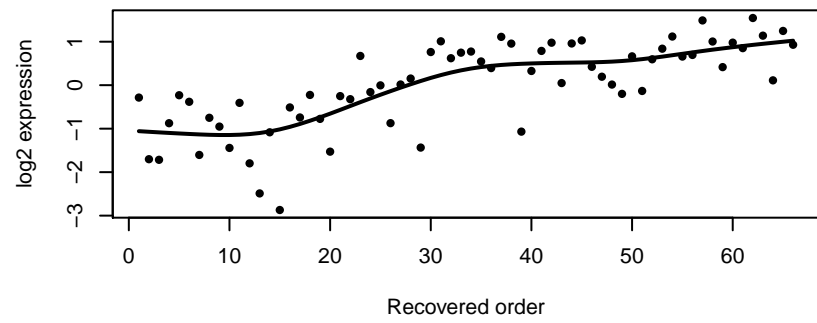**Pigr**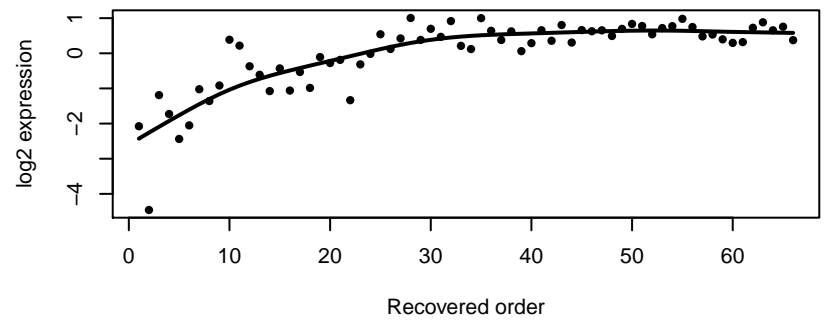**Ugt2b38**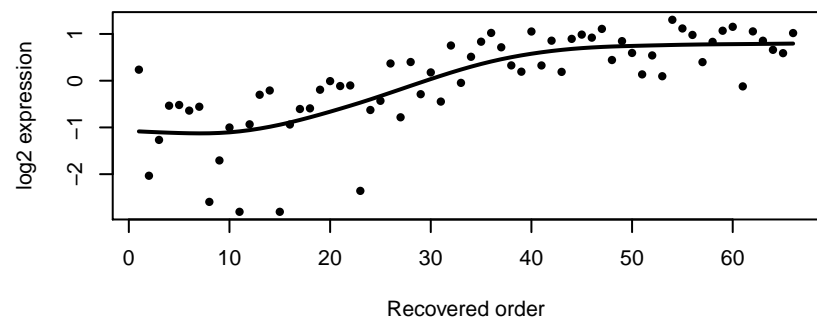**Gm20594**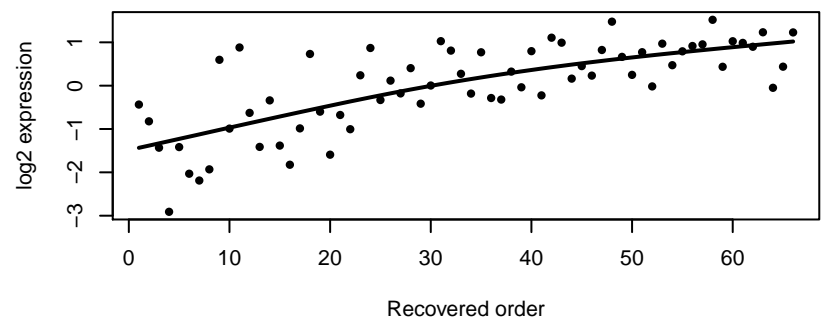**Slc3a1**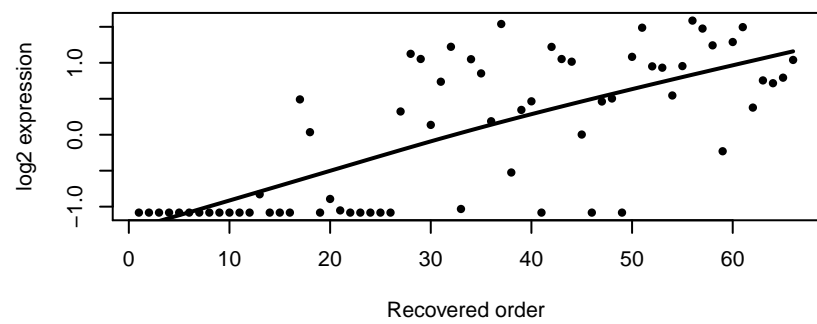**Cldn2**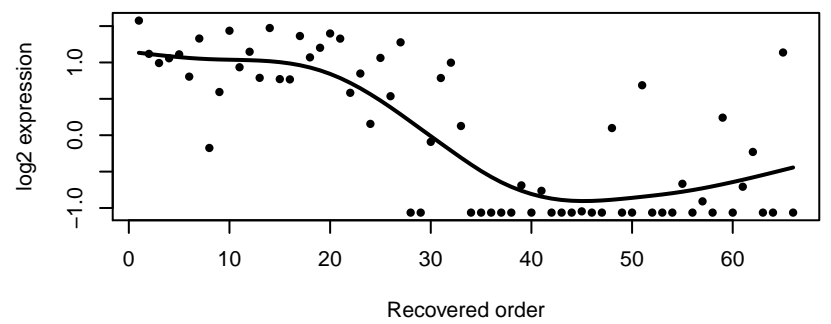

**Tm4sf4**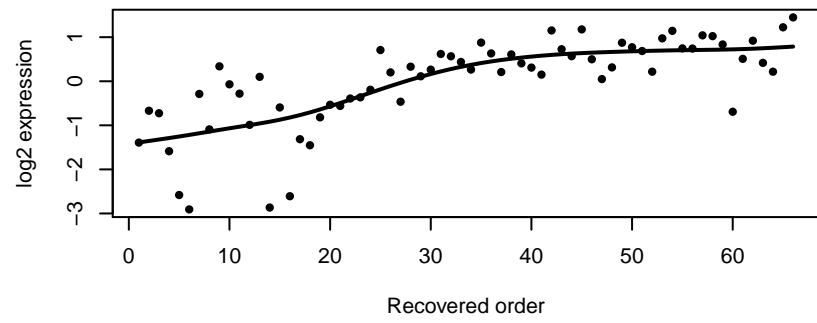**Sord**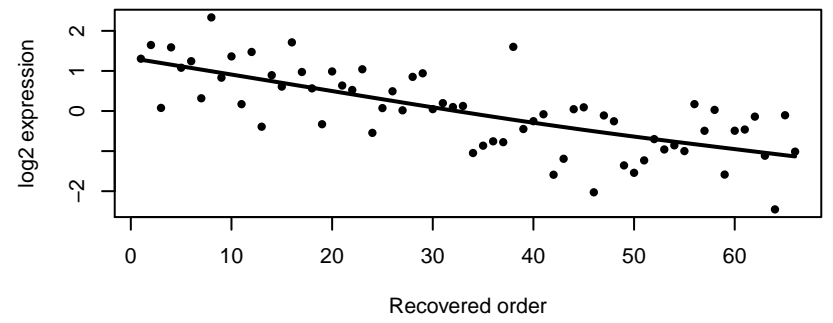**Gapdh**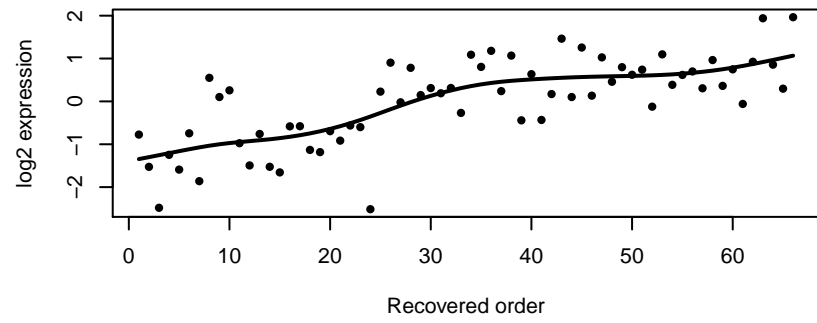**Alb**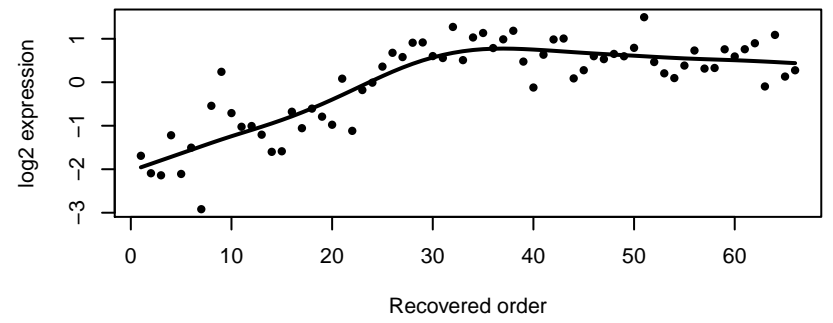**Pparg**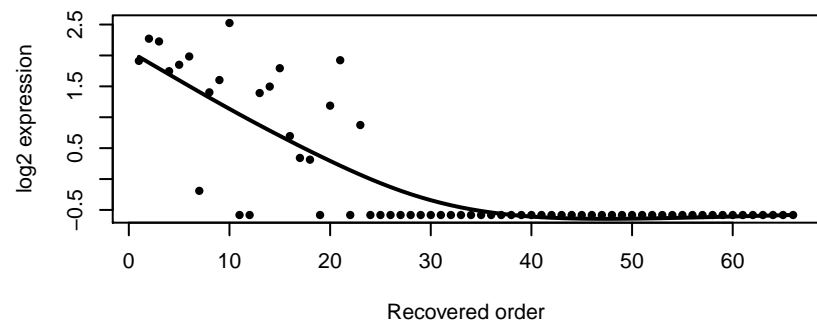**Hsd17b6**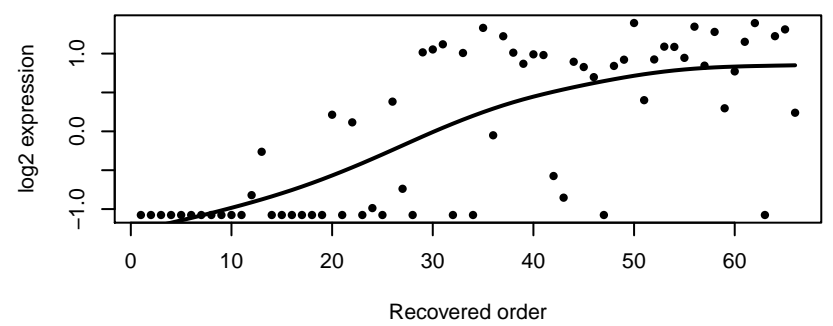**Ambp**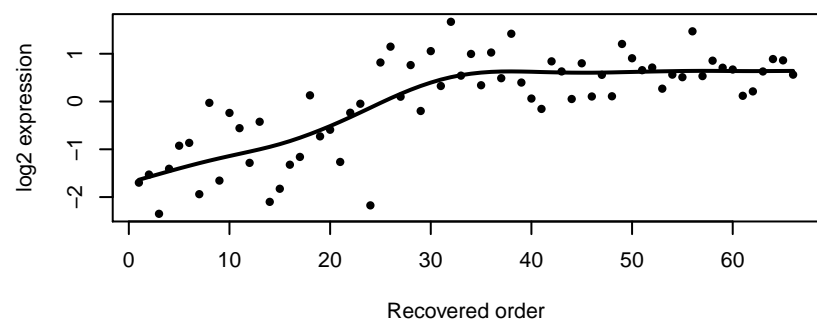**Hp**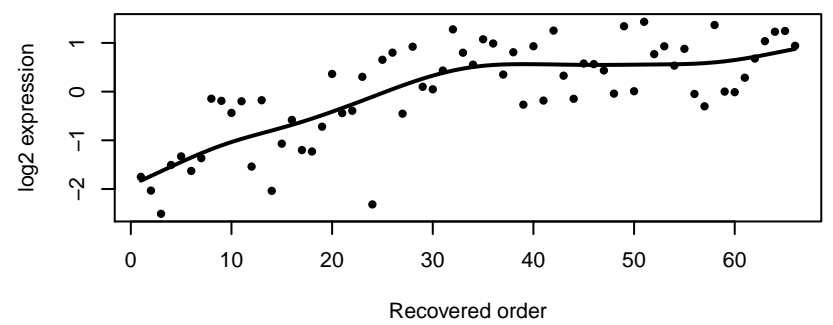**Slc25a47**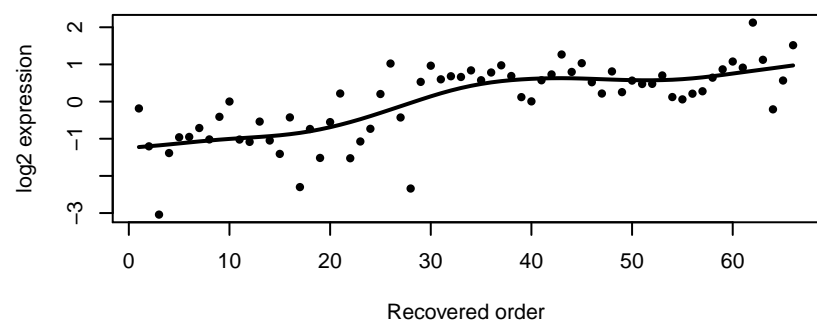**B2m**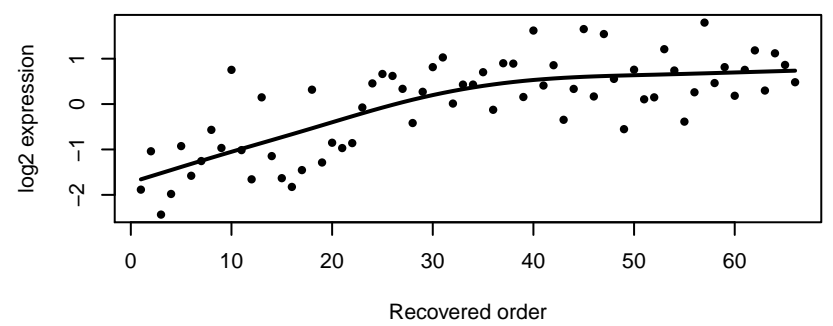



**Igf1**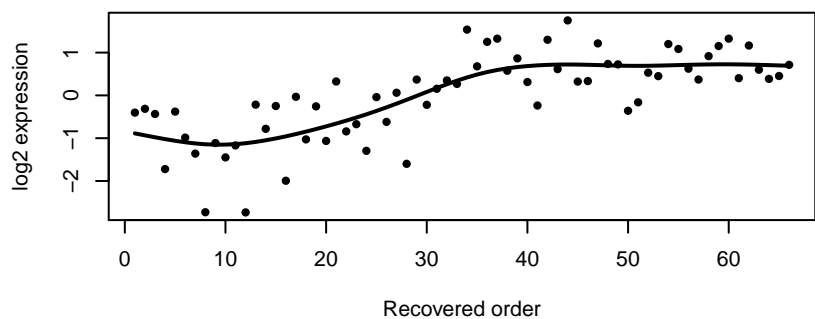**Sult5a1**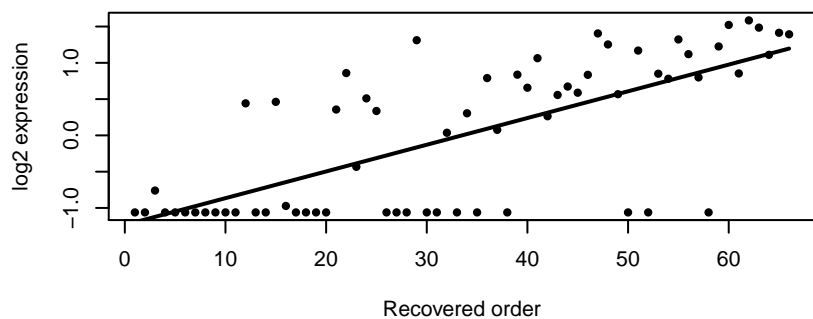**Bdh2**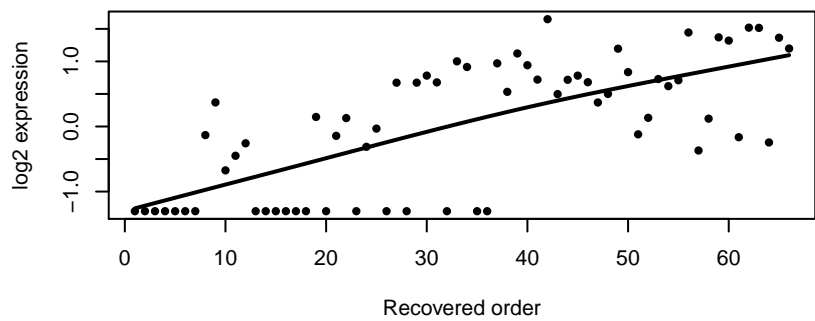**Glul**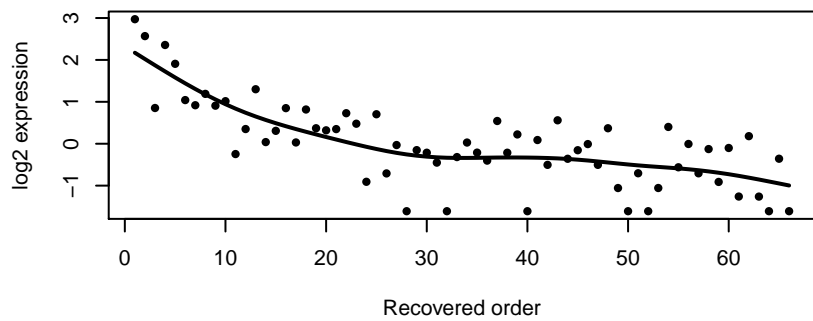**Cfh**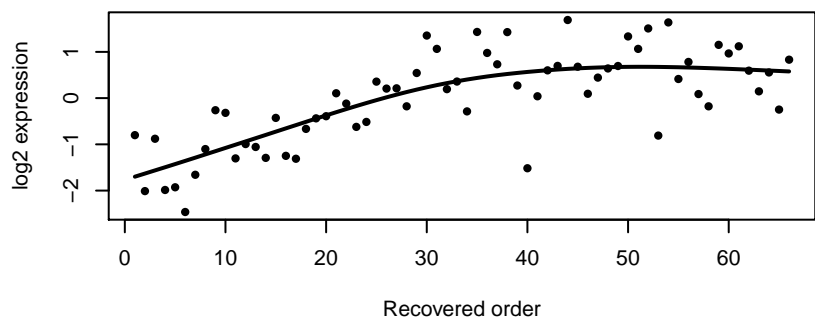**Npr2**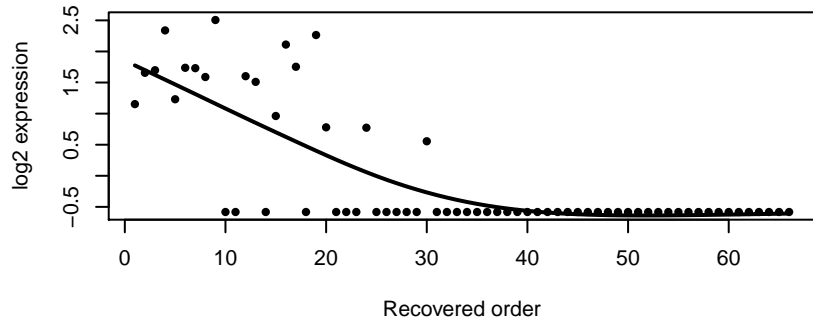**Csad**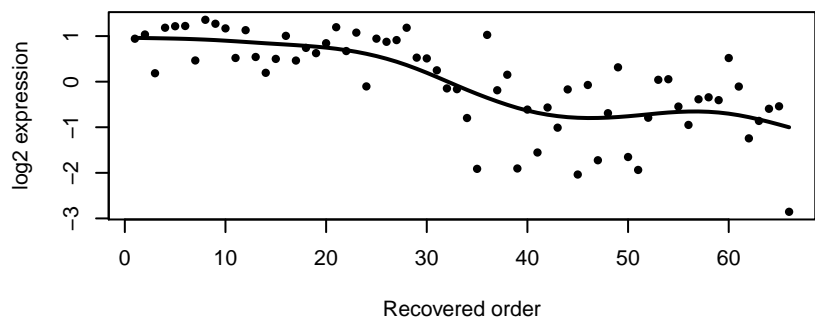**Nr1i3**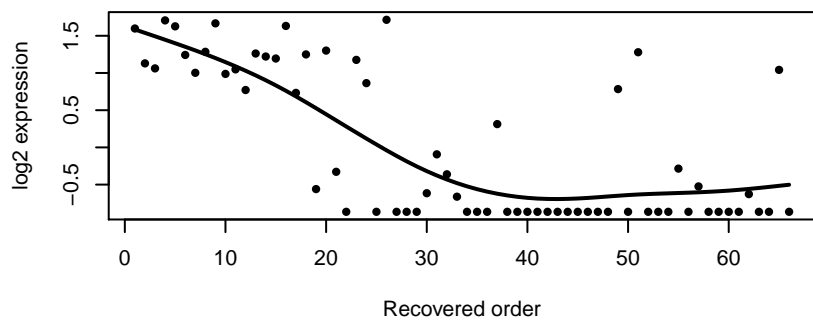**Gas2**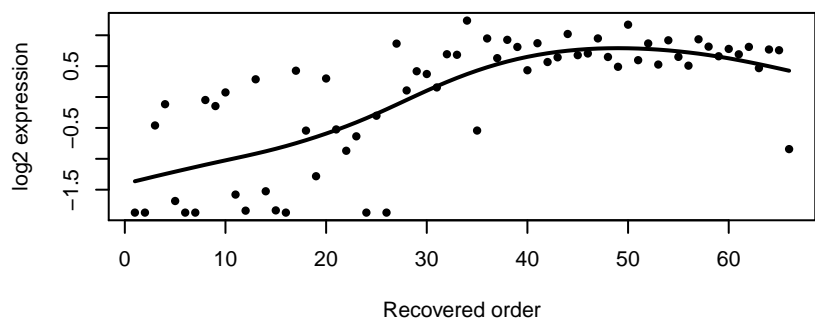**Abhd2**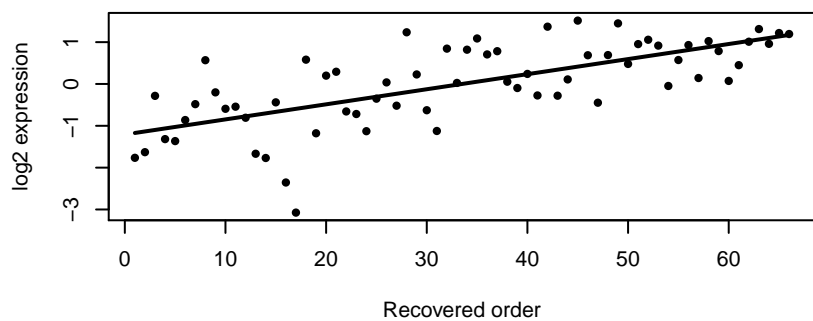

**Serpina7**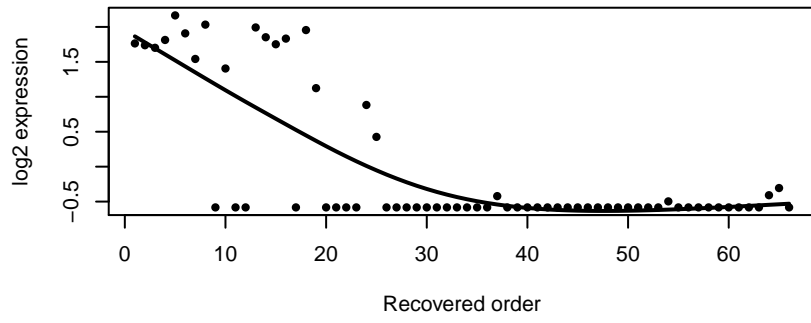**Ftcd**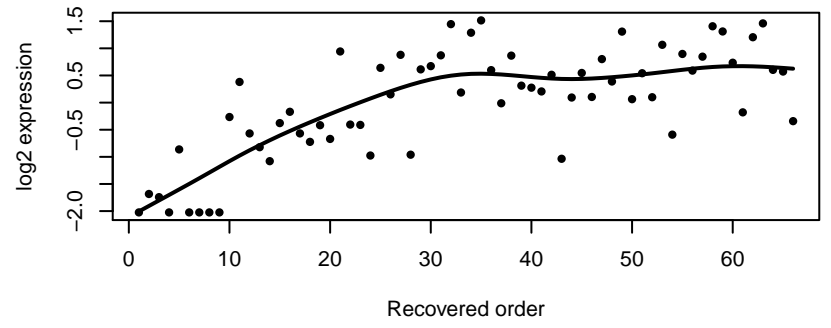**281007J24Rik**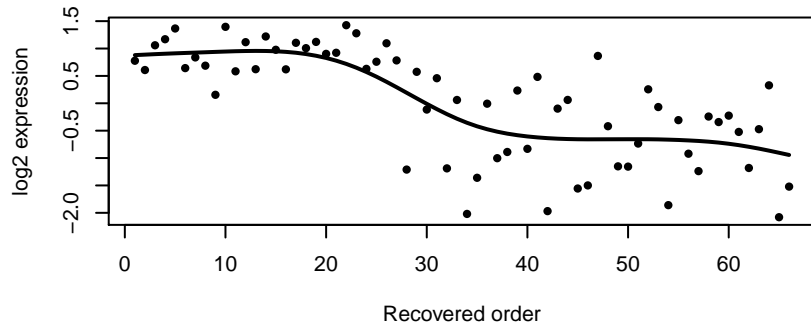**Fgg**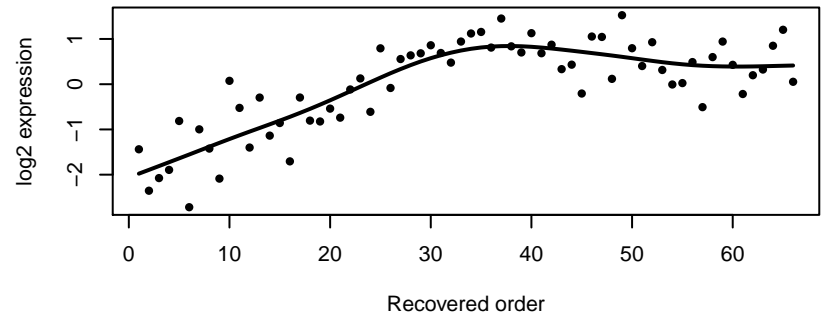**Cfi**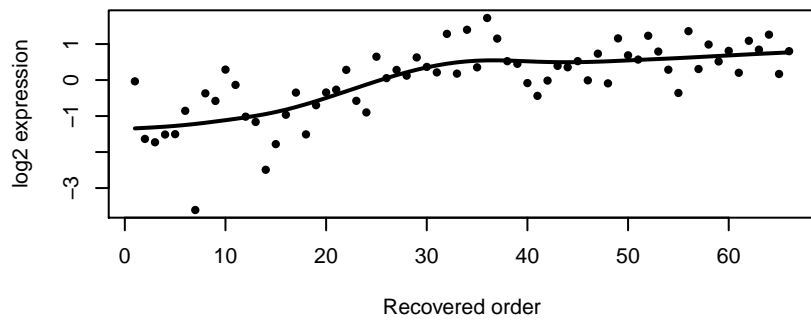**H2-Q10**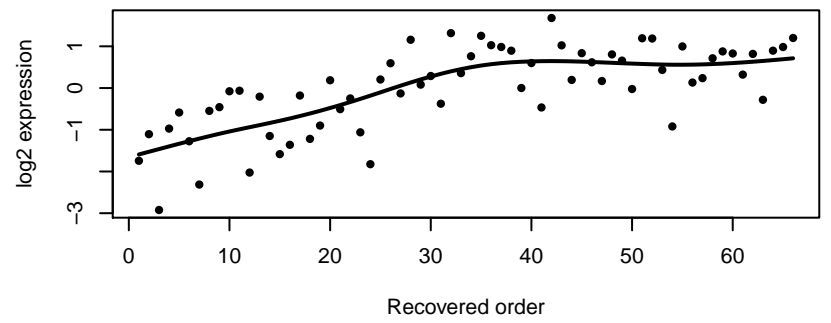**Aldh1b1**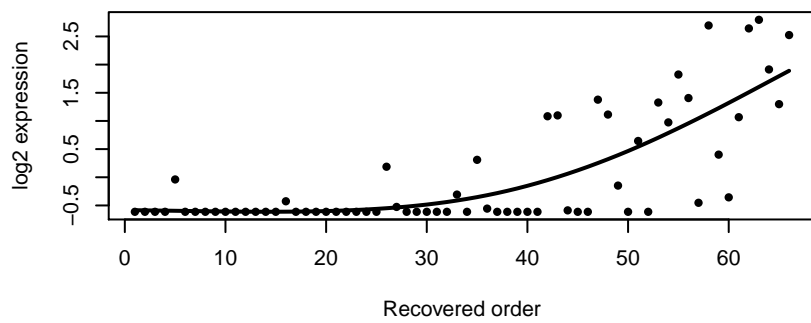**Apoa4**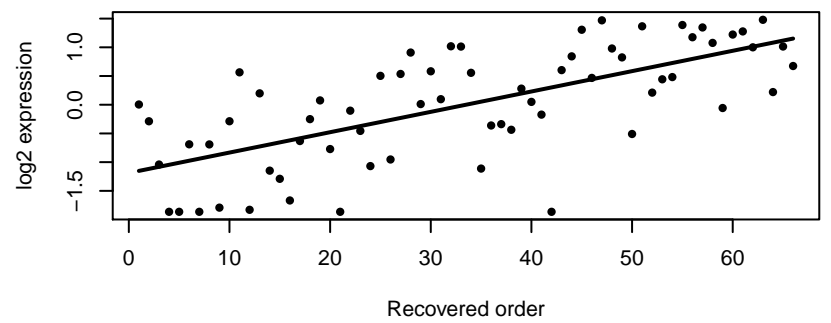**C8a**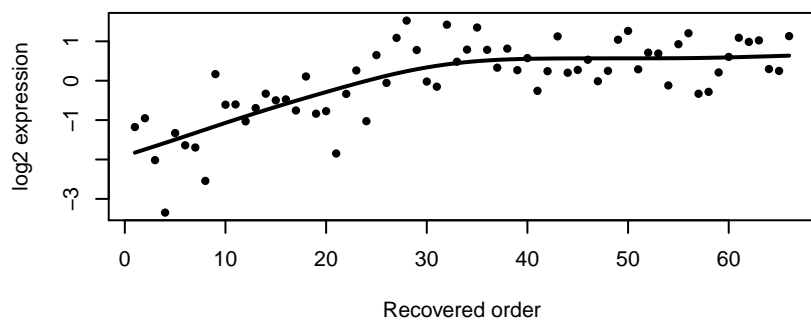**Mup6**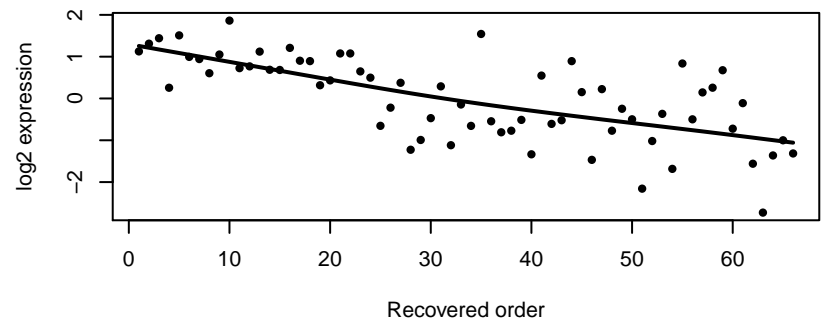

**Cyp2d26**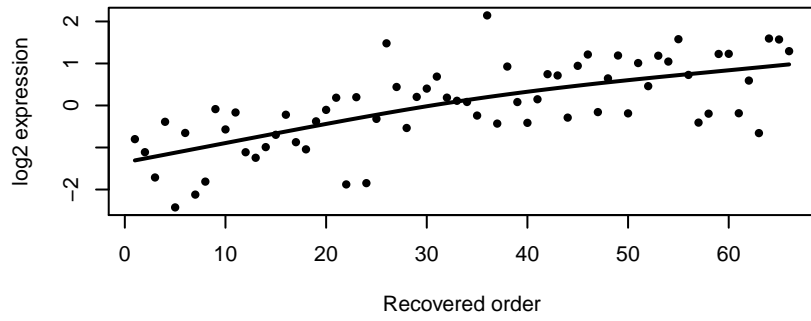**Slc7a2**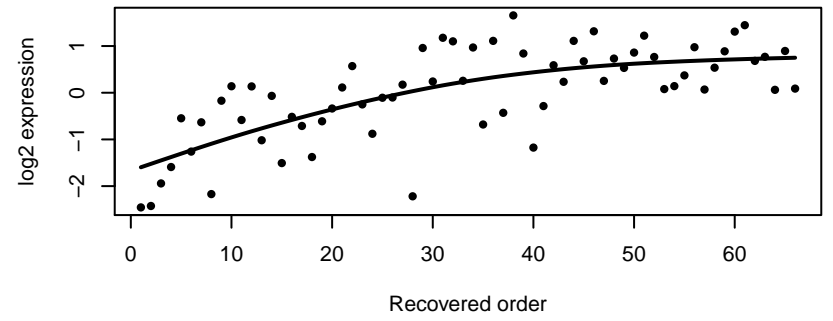**Tsc22d1**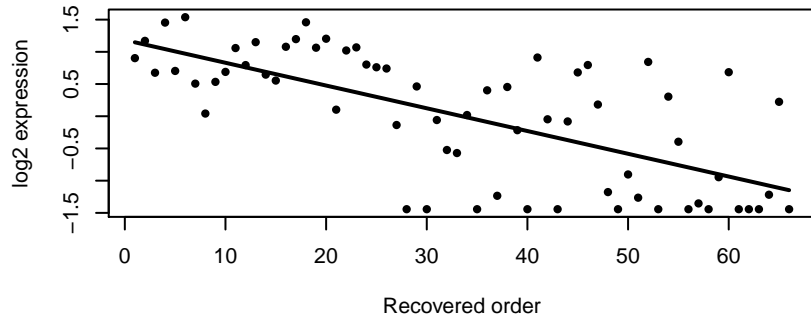**Azgp1**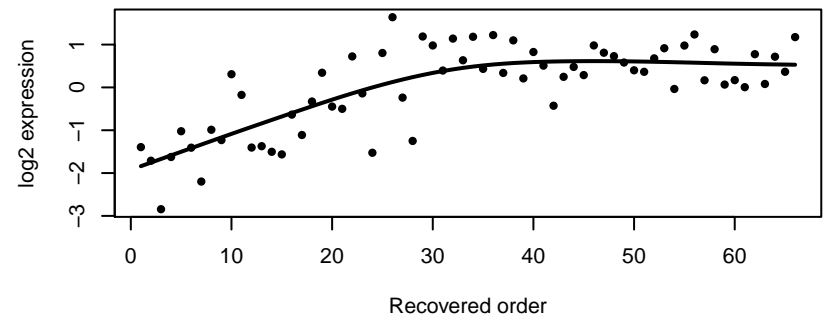**Gm2a**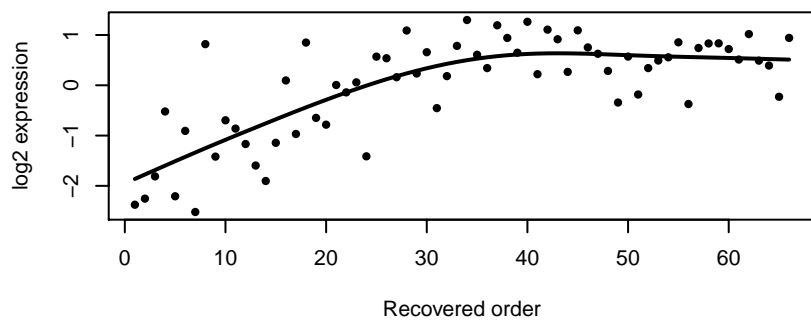**Ctnnbip1**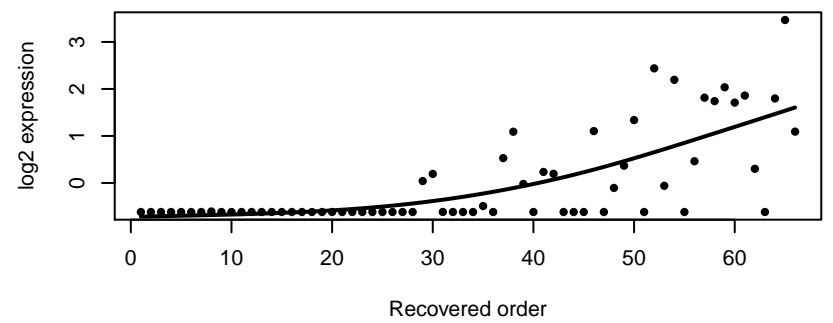**Otc**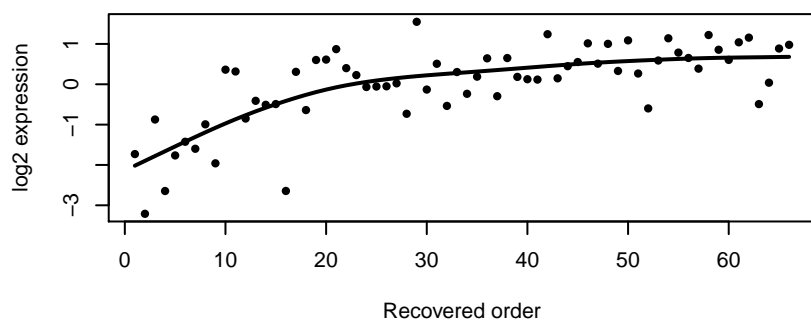**Apom**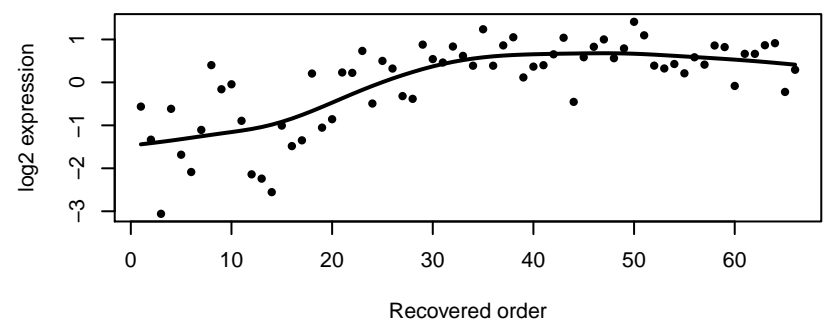**Serpind1**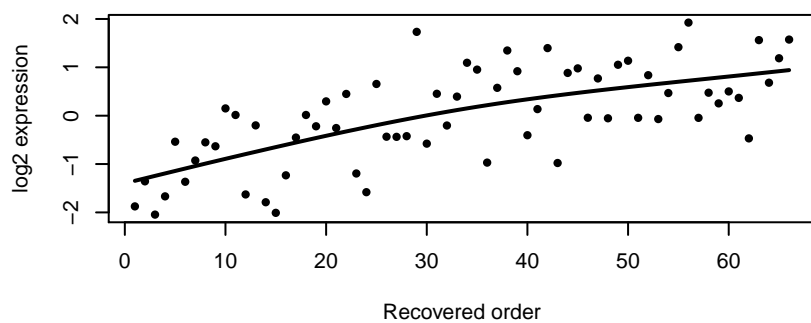**Cyp2c68**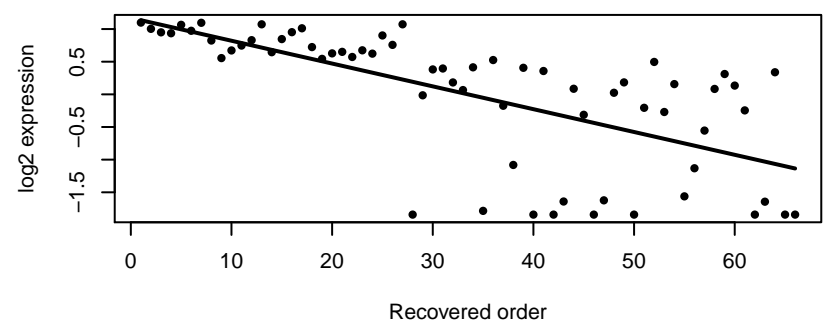

**Plxna2**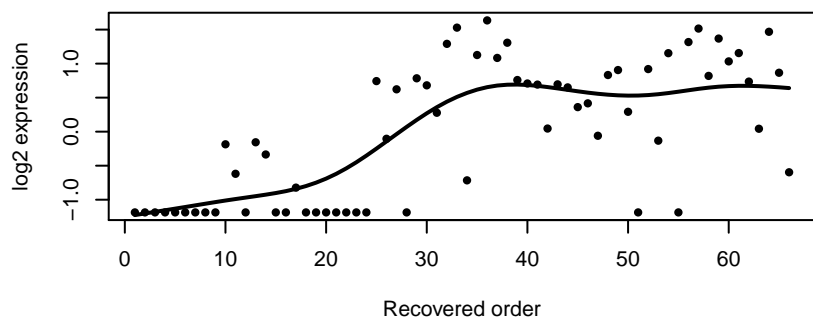**Serpina1b**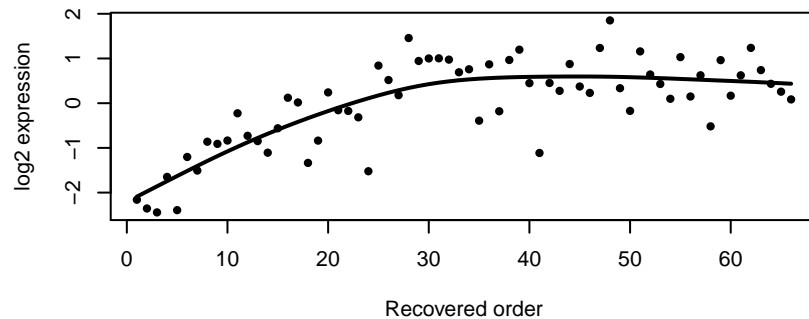**Apof**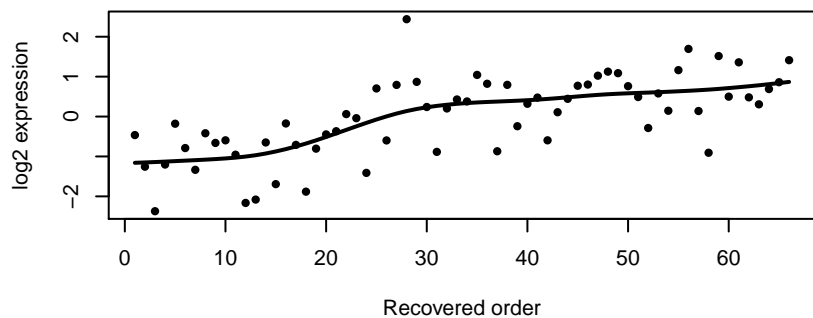**Kng1**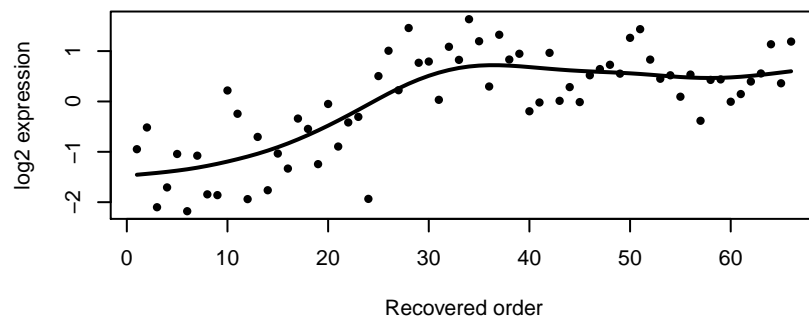**Cyp2a12**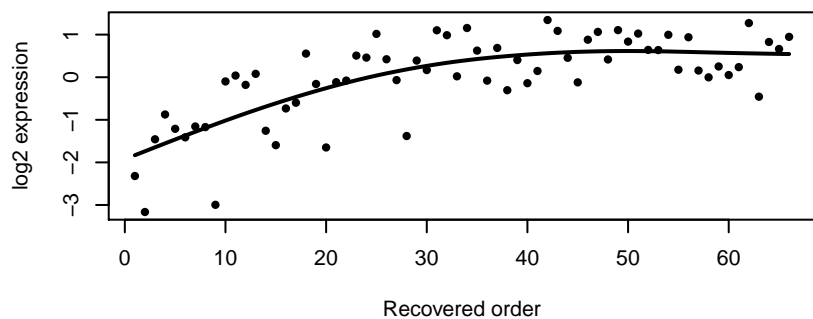**Apoa5**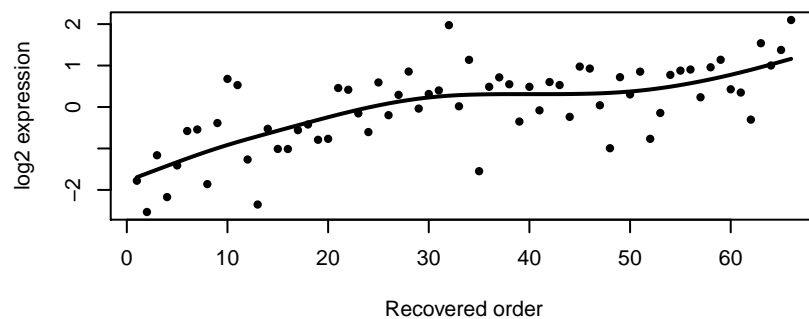**Ifitm2**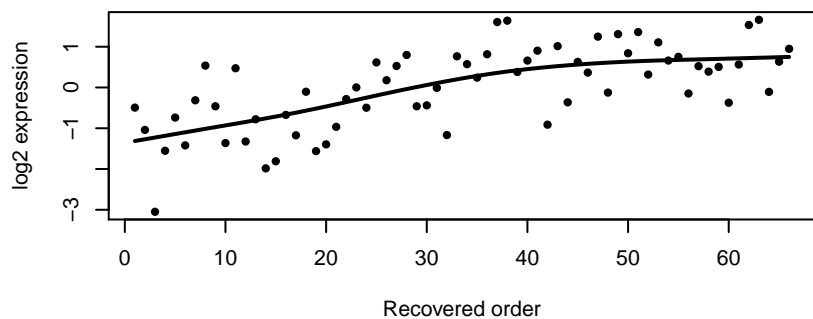**Tsku**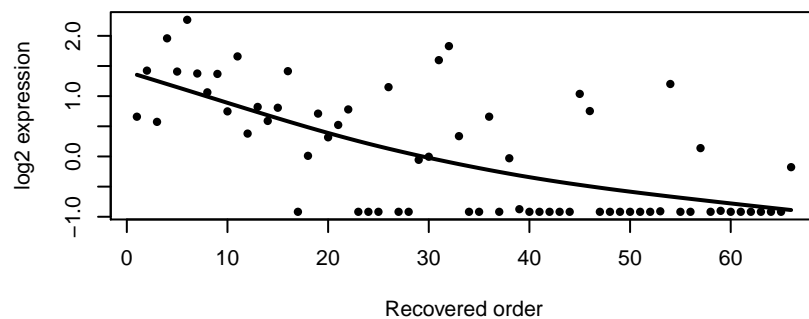**Mme**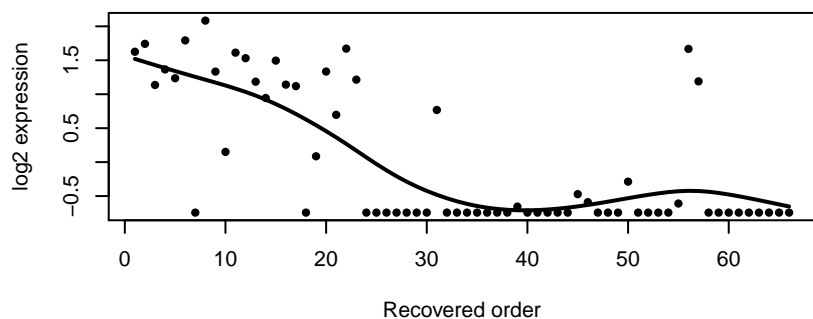**Cyp2c69**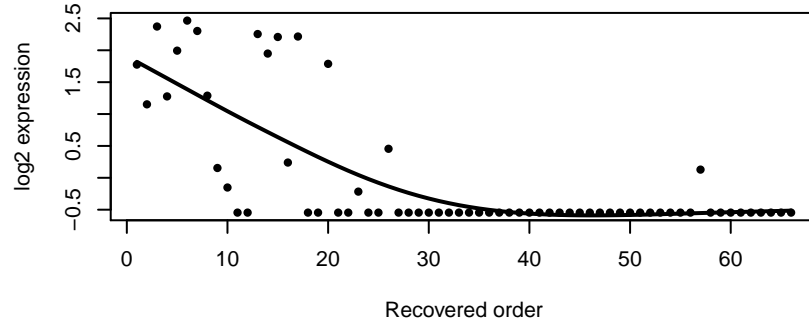

**Mug2**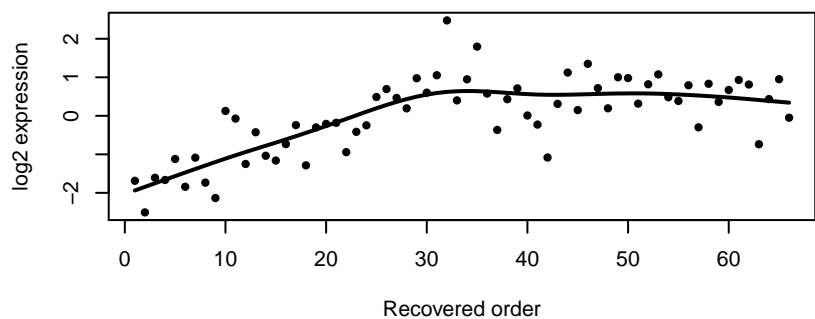**Gnmt**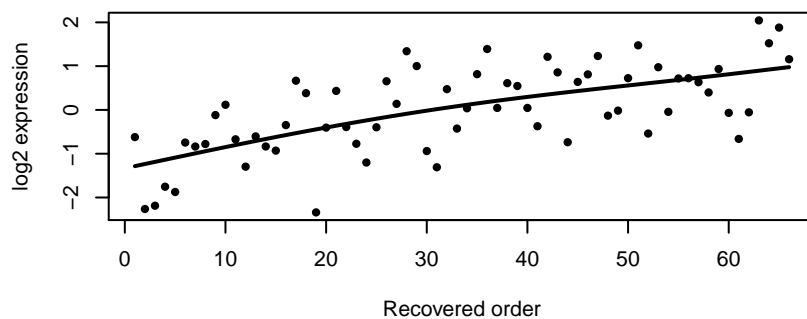**Atp5h**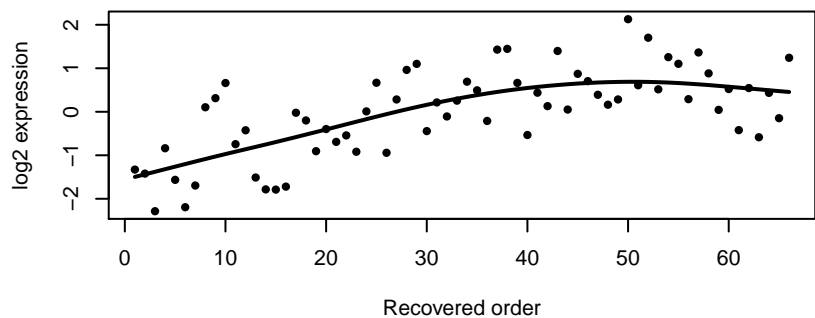**Arg1**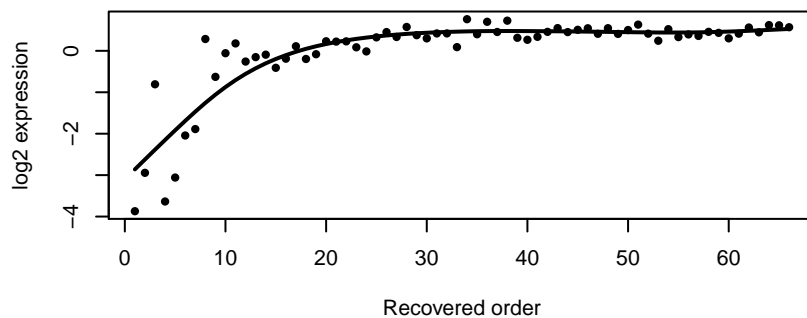**Pcp4l1**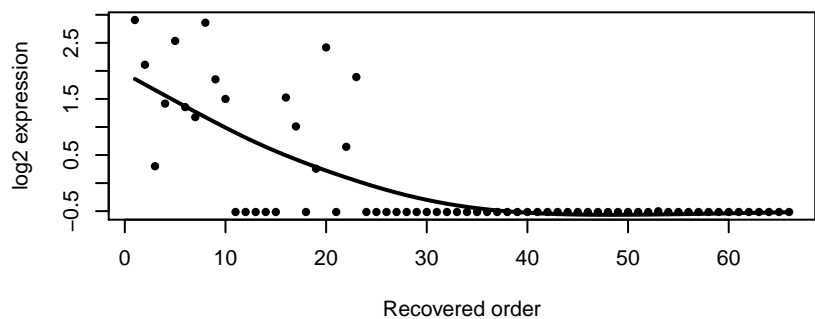**Itih4**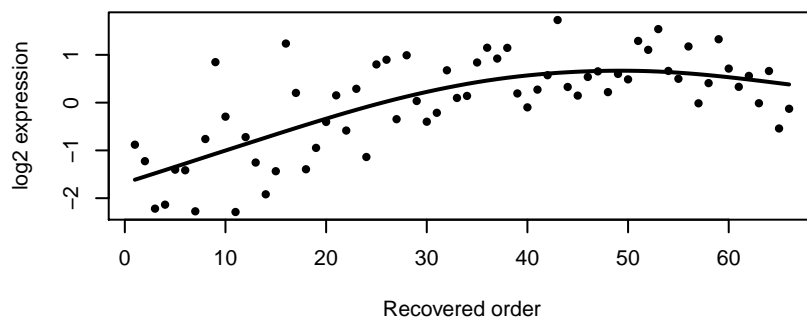**Gstp1**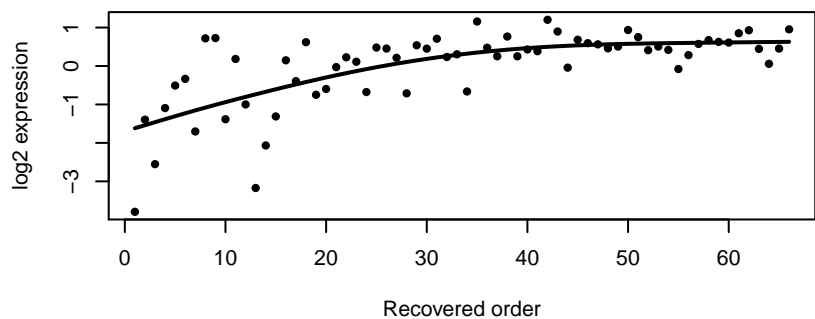**Uqcrh**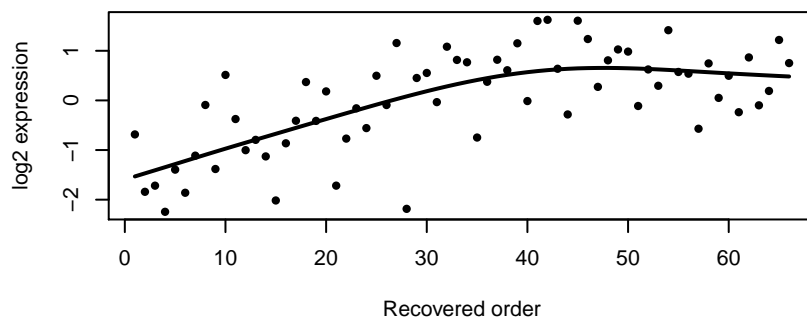**Fgb**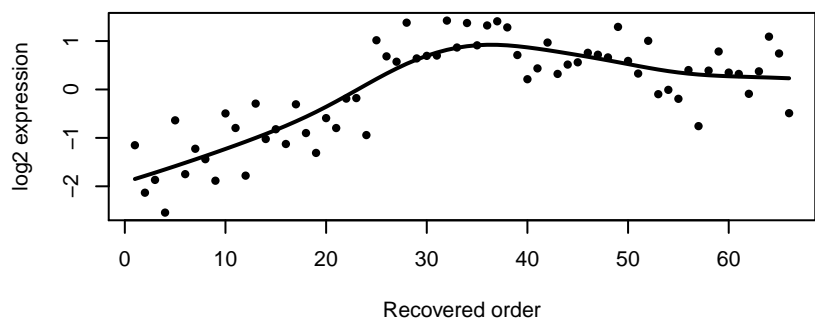**Serpina1c**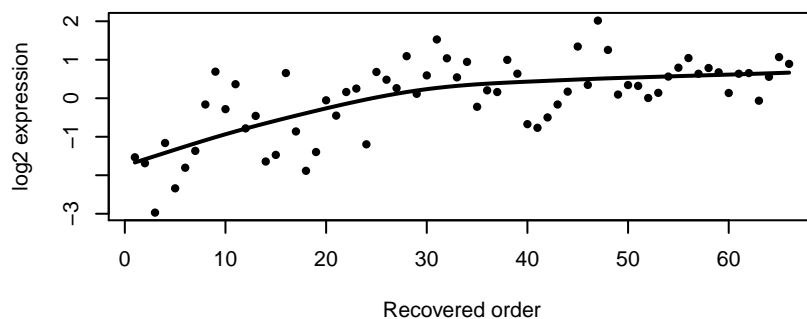

**Serpina1d**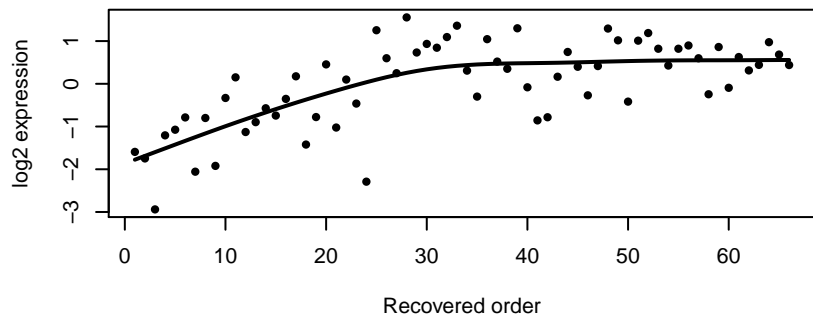**Elovl5**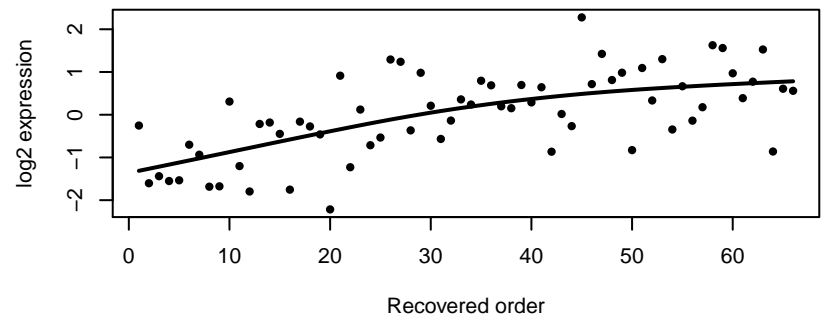**Ctsl**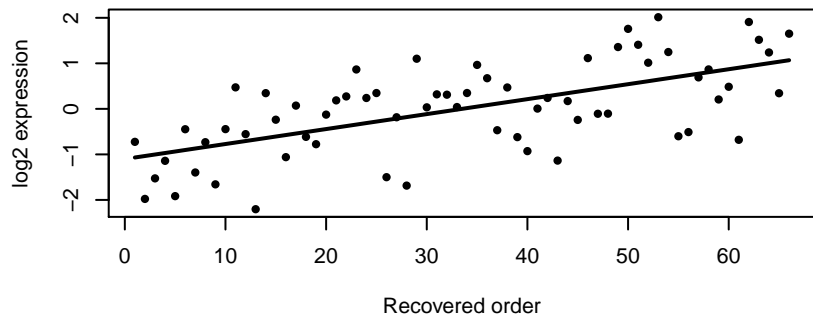**Cp**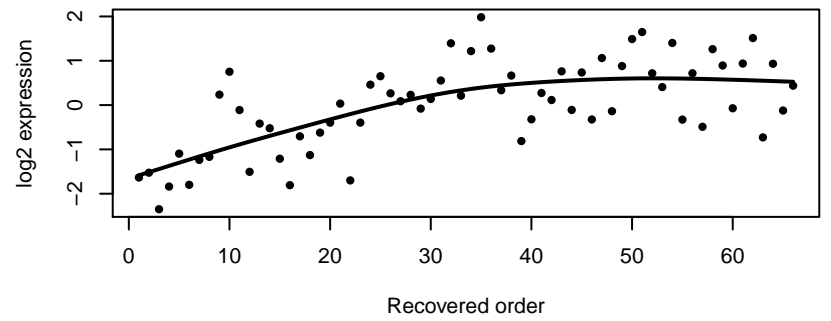**Sox9**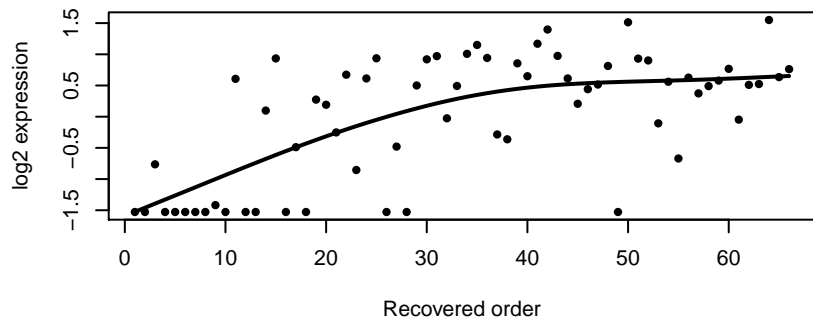**Ass1**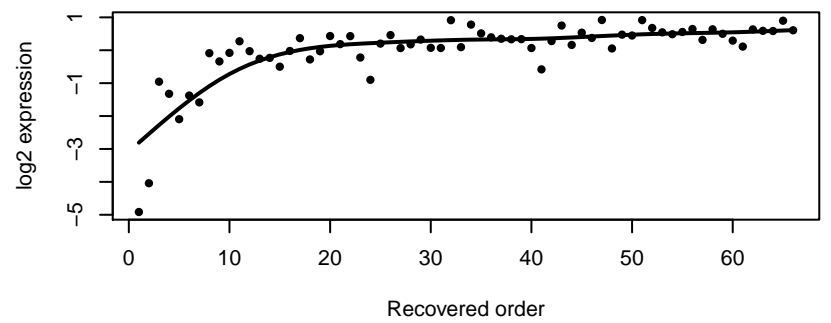**Asl**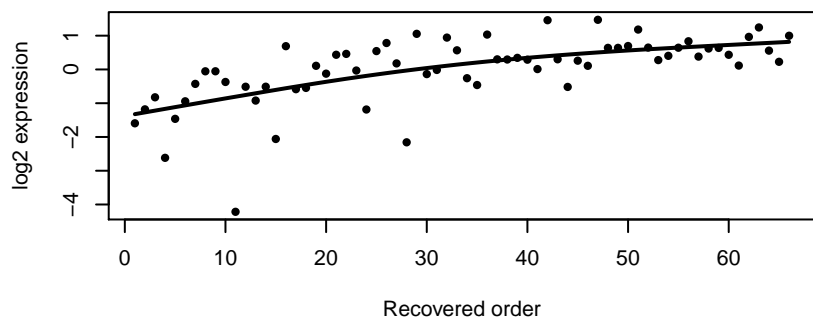**G6pc**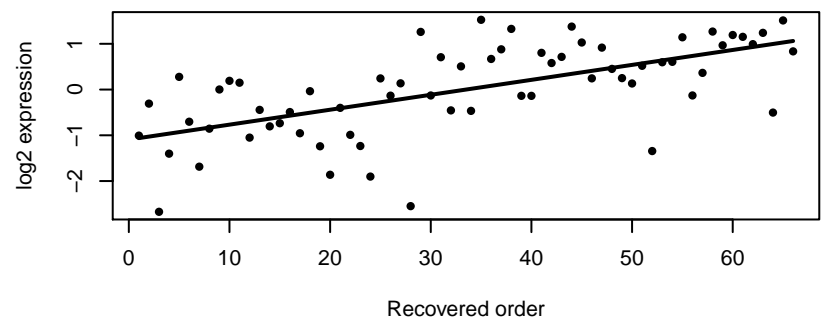**Vtn**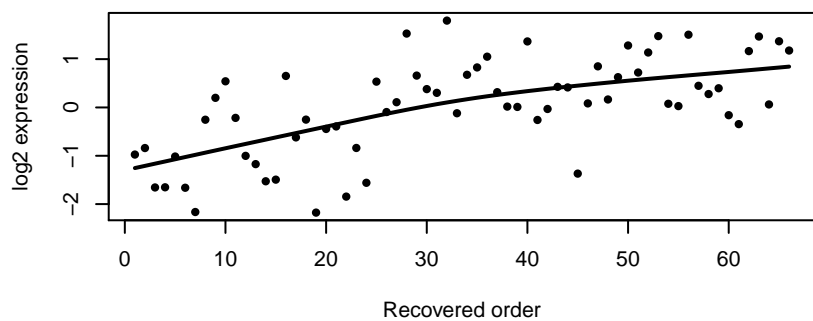**Tenn3**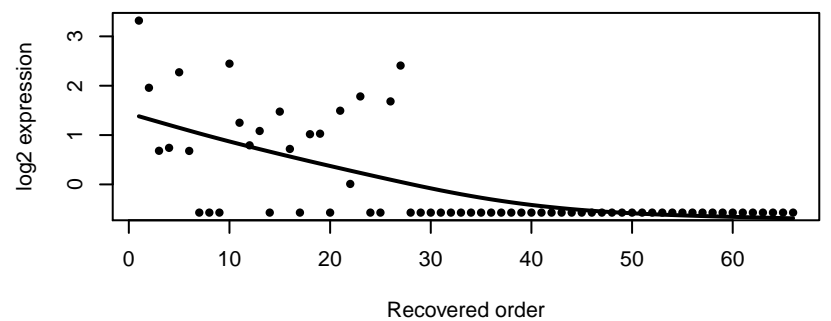

**Tstd1**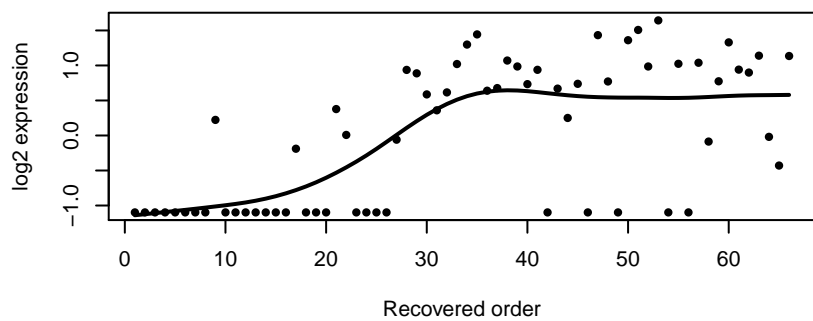**Cfhr2**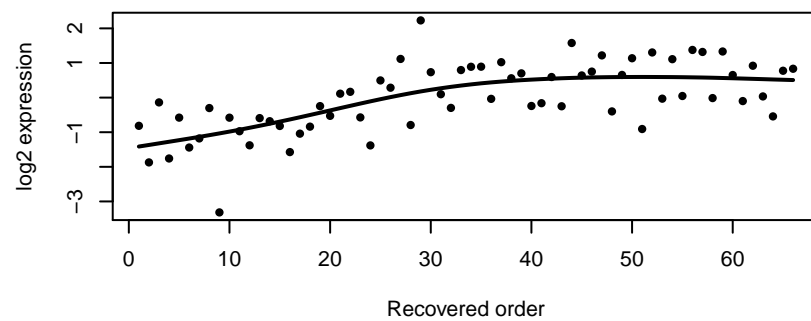**Apoa1**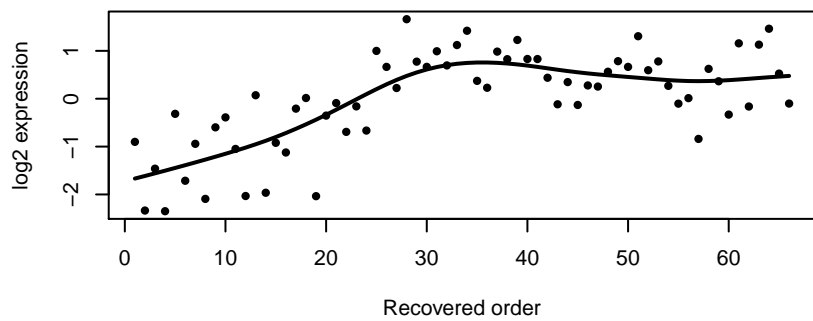**Serpina1a**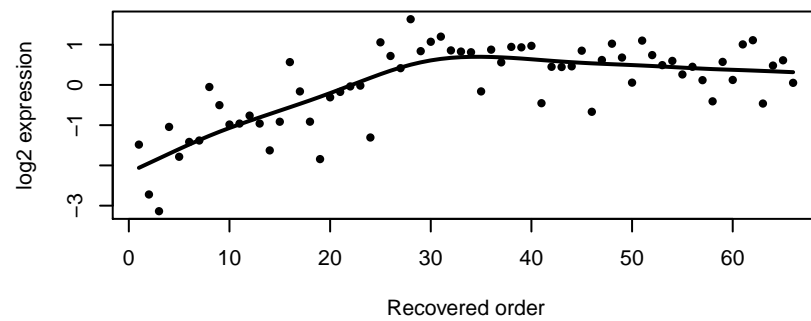**Serping1**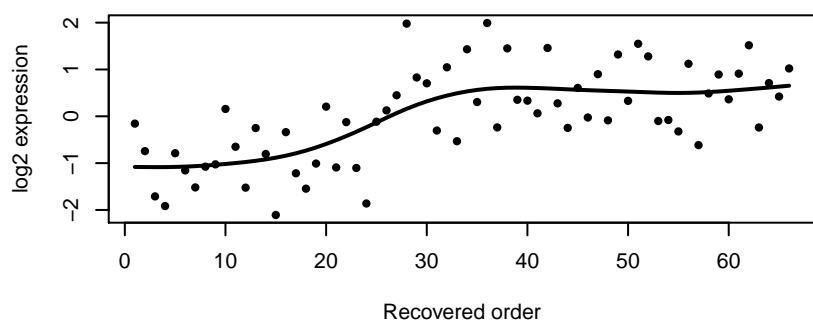**Zfp575**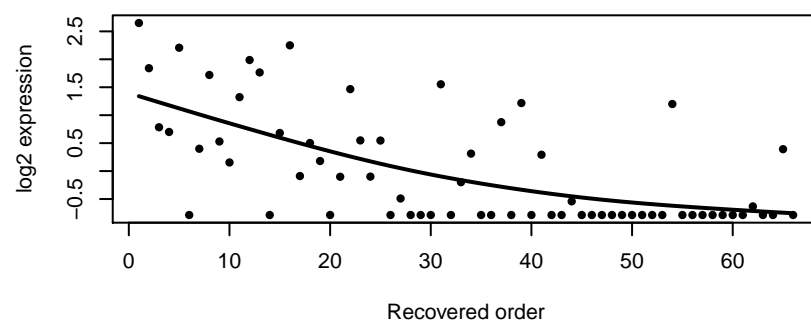**Ak4**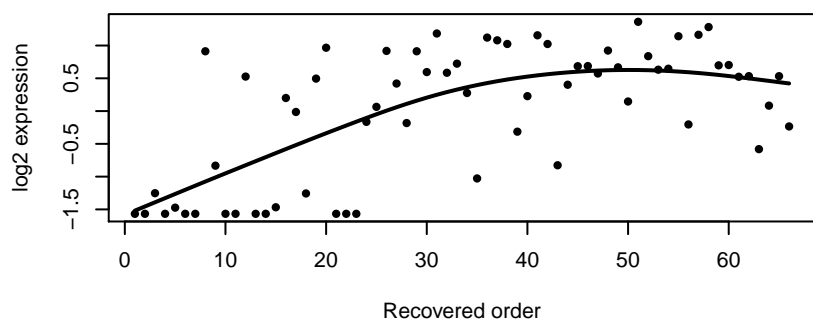**Cyp3a41a**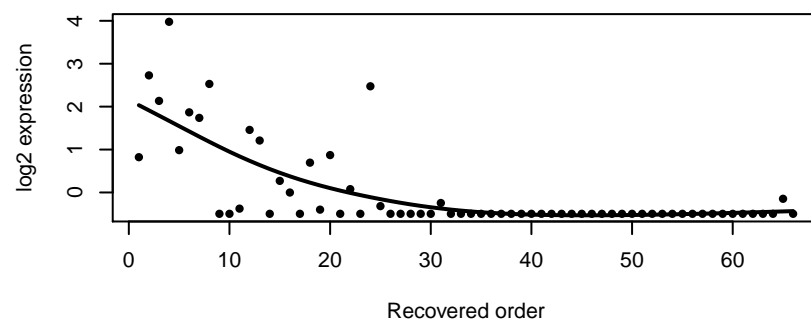**Elovl2**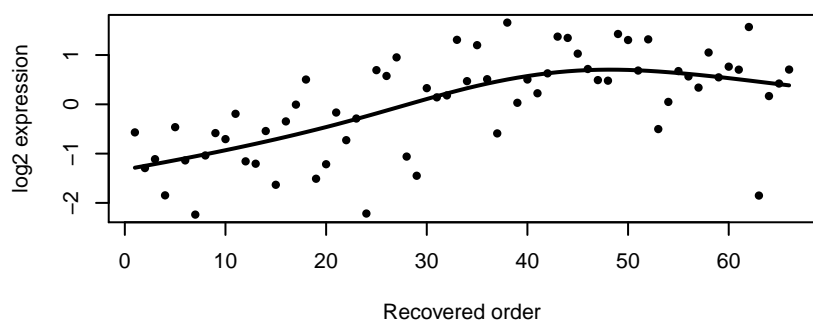**Ccl9**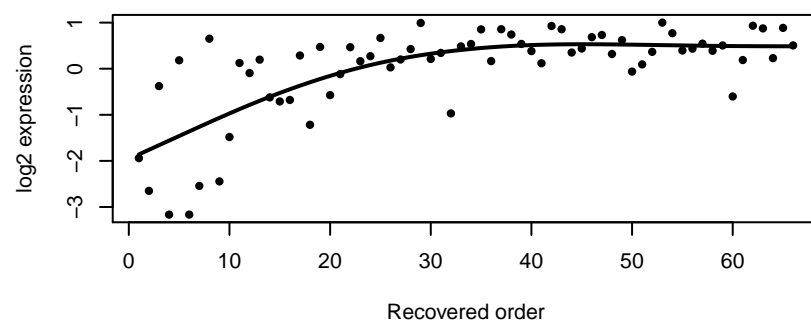

**Tdo2**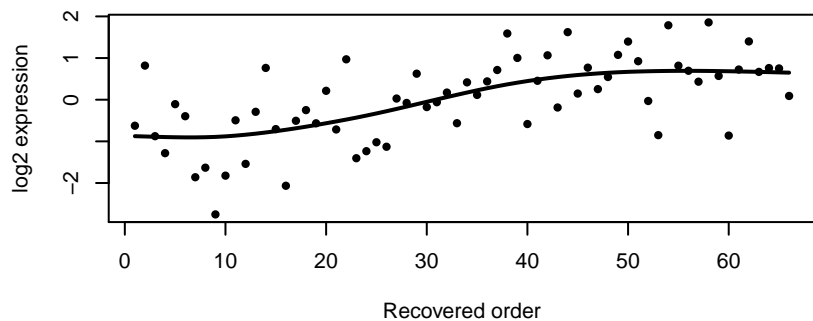**Slc16a10**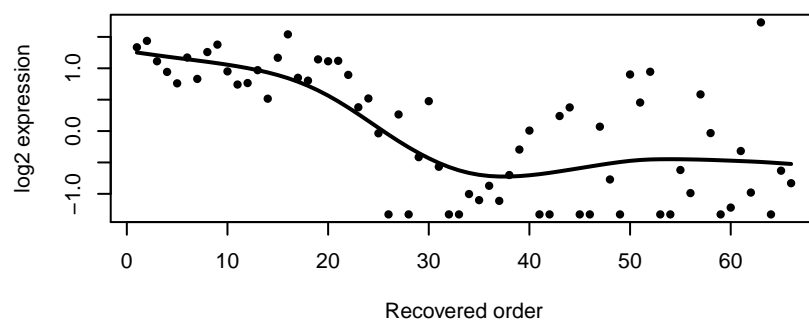**Cyp4v3**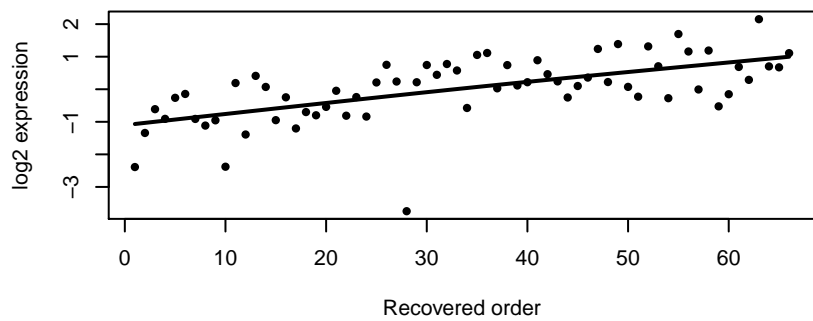**Clu**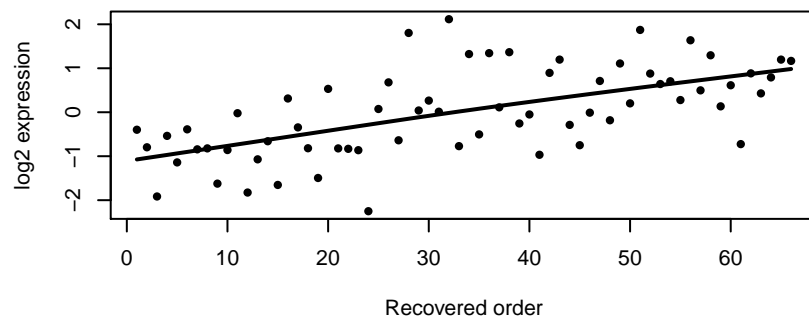**Scp2**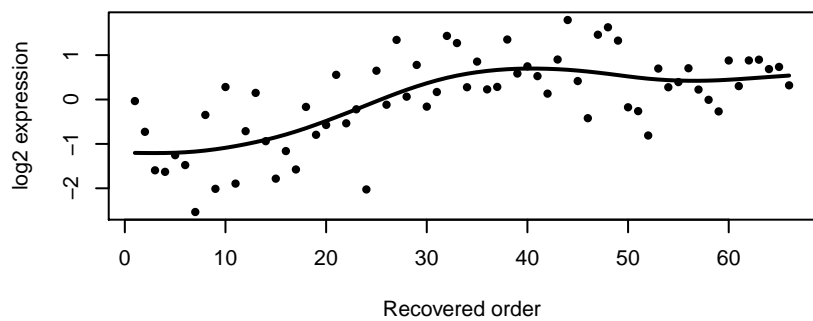**C8g**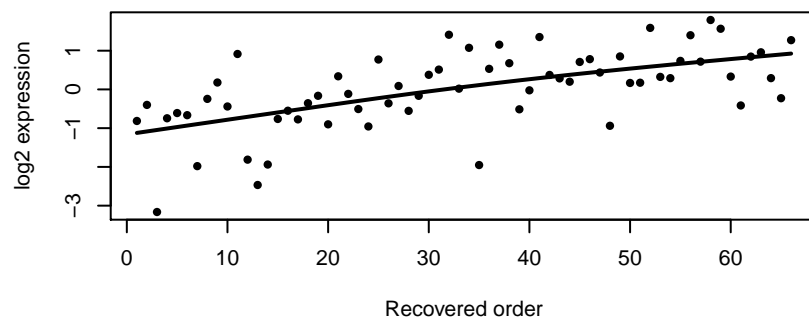**Aox3**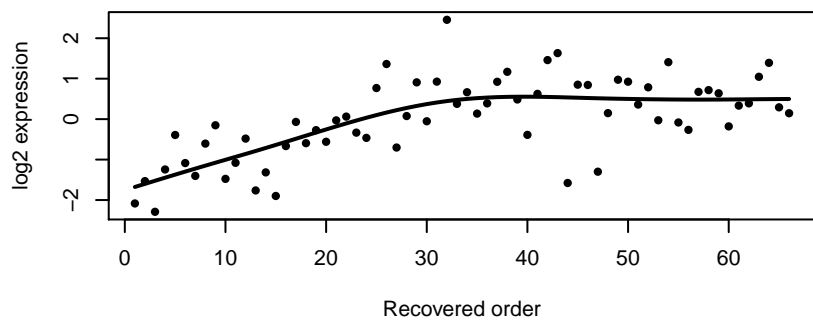**Blvrb**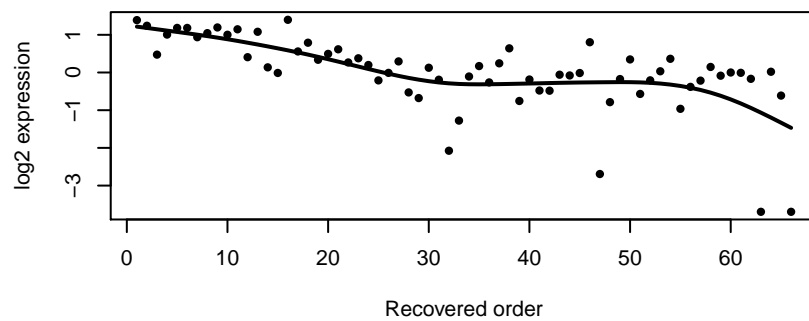**Rmdn2**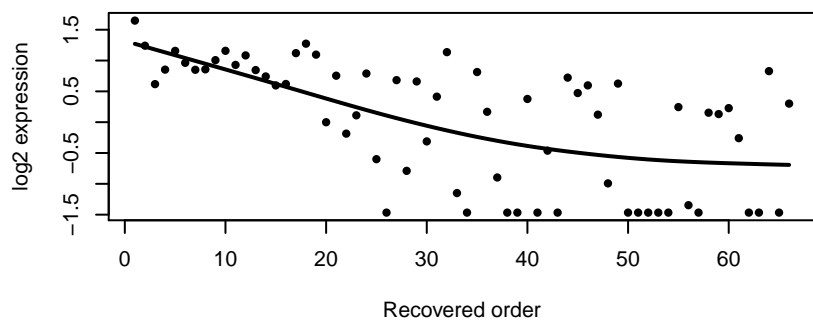**Ifitm3**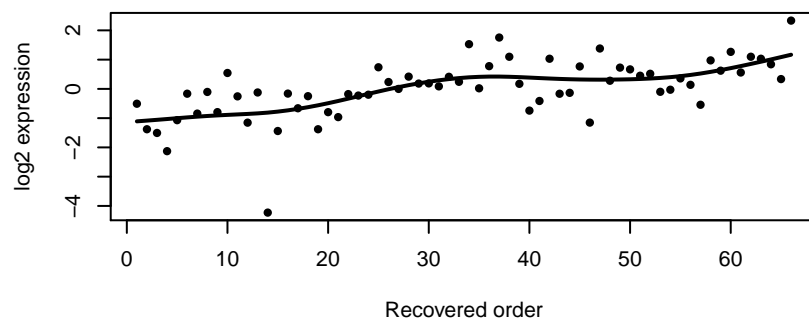



**Pdcd4**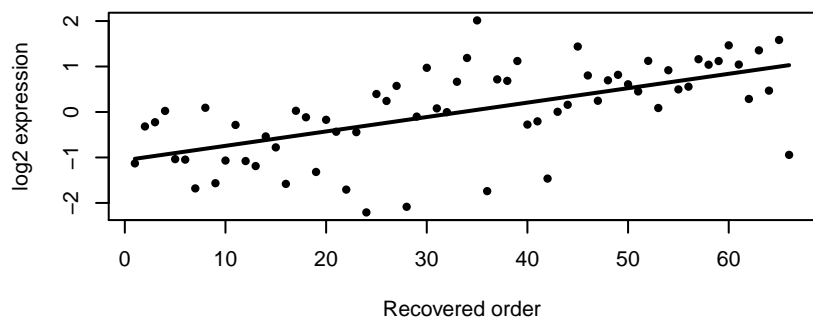**Uqcr10**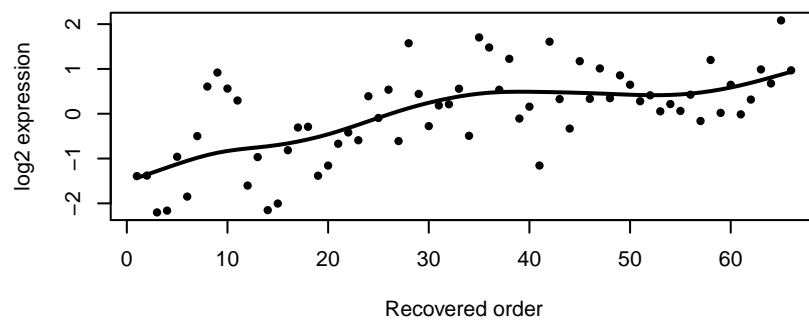**Mup9**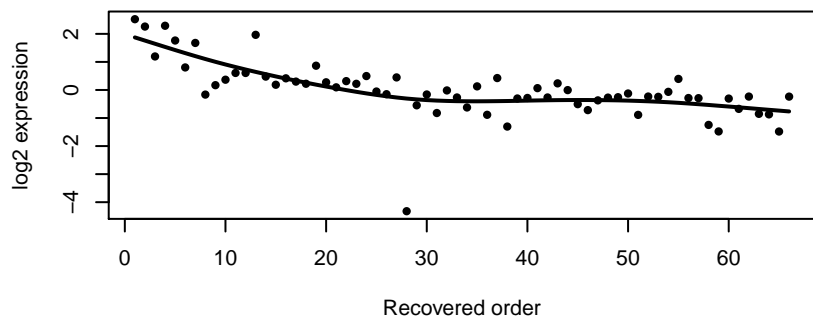**Cry11**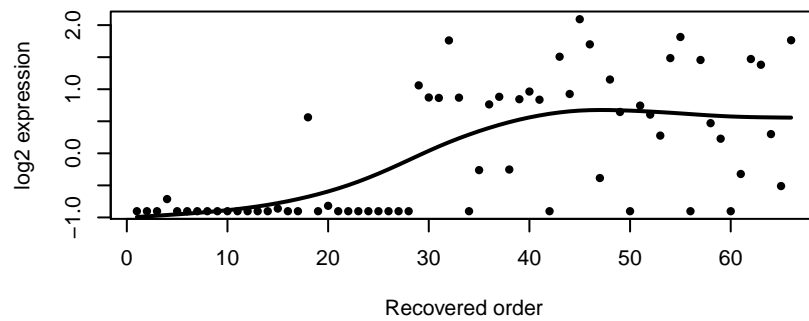**Id2**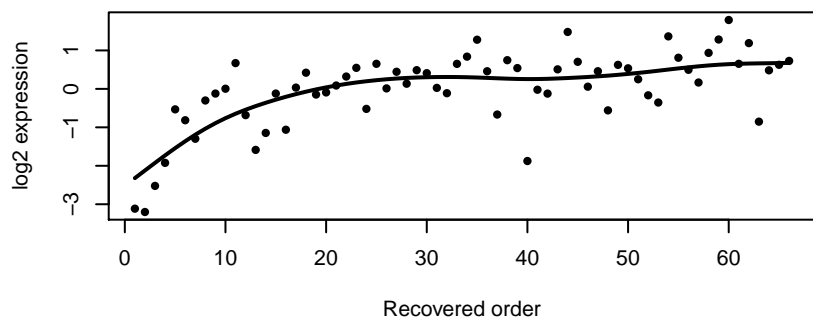**Serpinc1**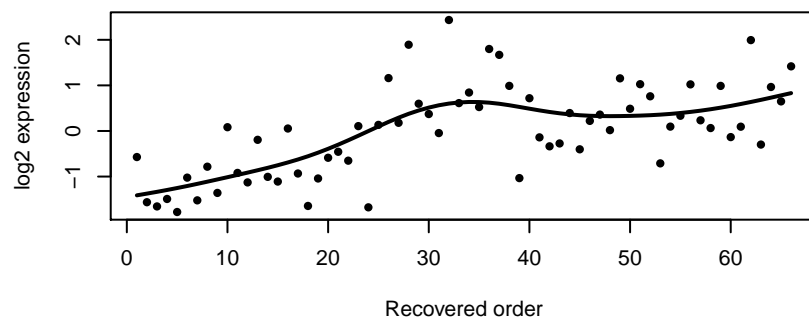**Fga**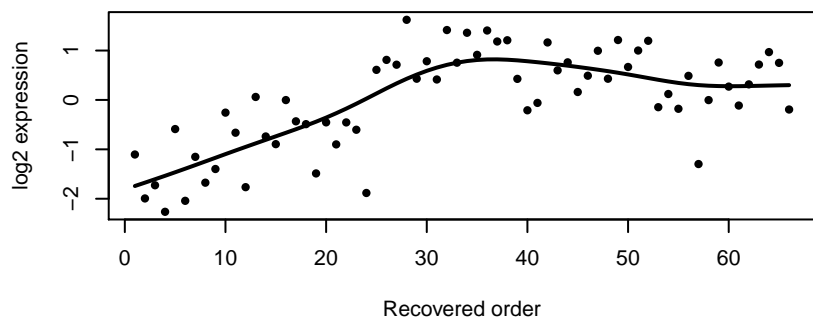**Aspg**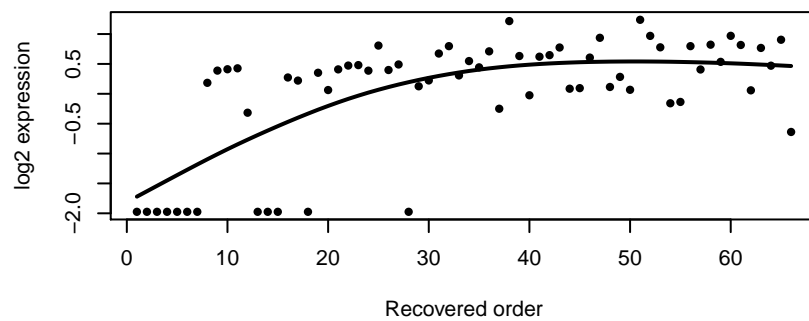**Calr**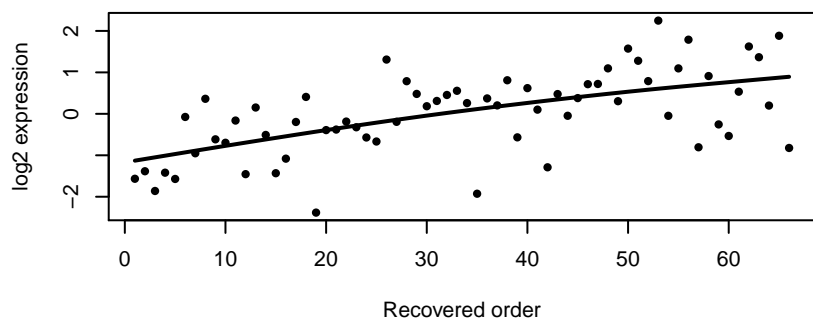**Spin1**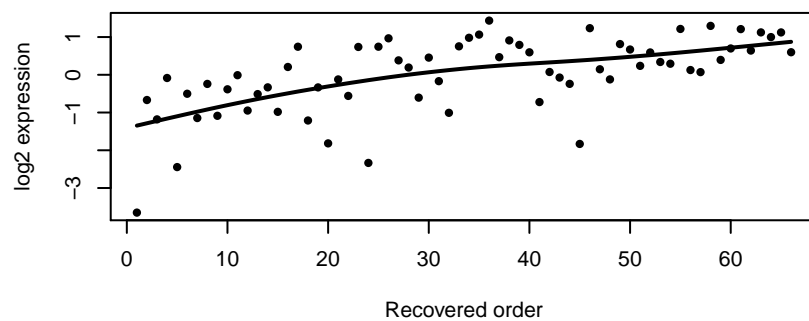

**Ugt2b1**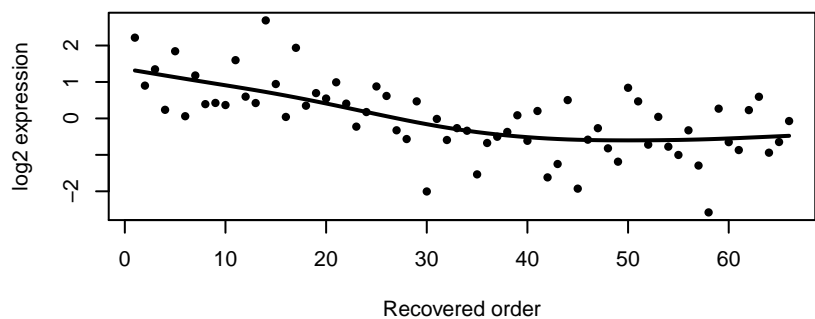**Atp5j2**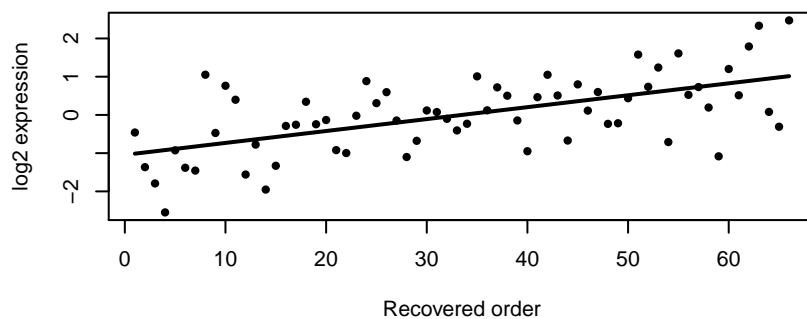**Ces2c**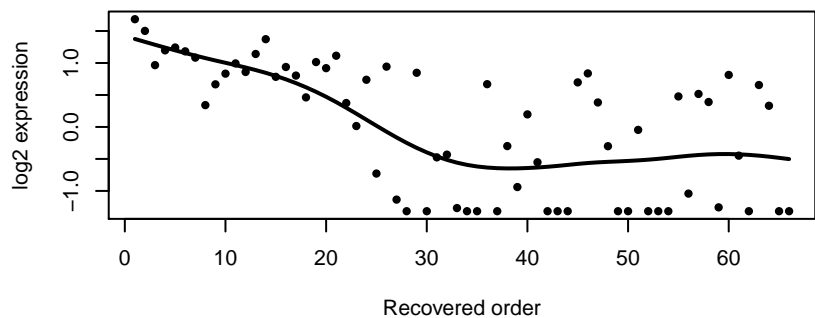**Fxyd1**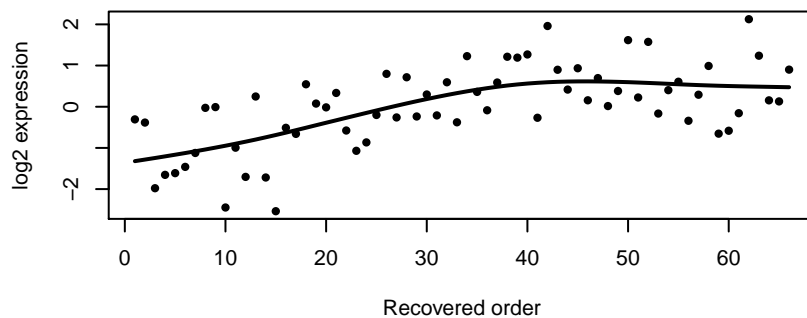**Ahsg**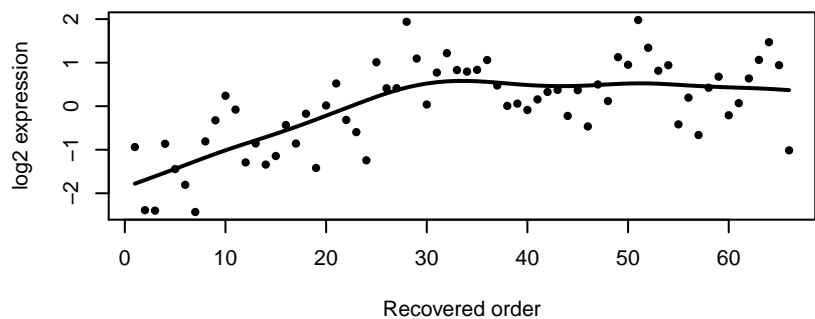**Slc16a12**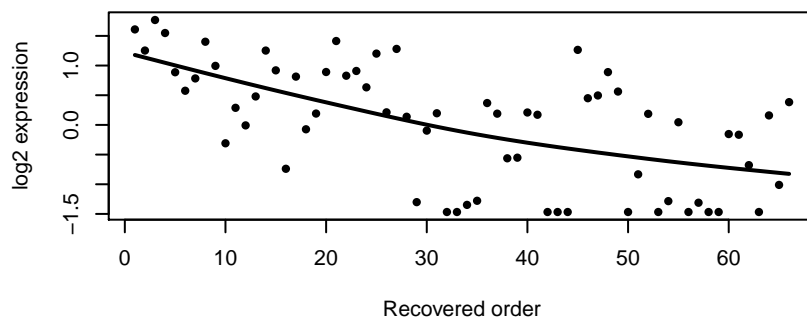**Cml5**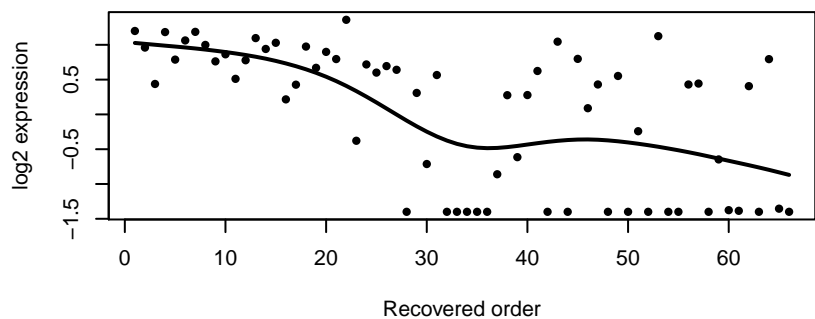**Rarres2**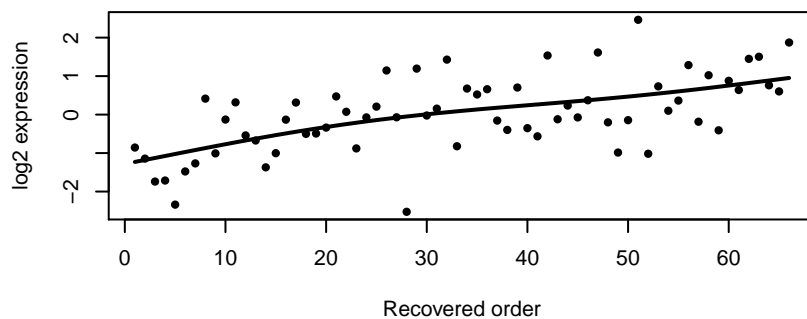**S100a1**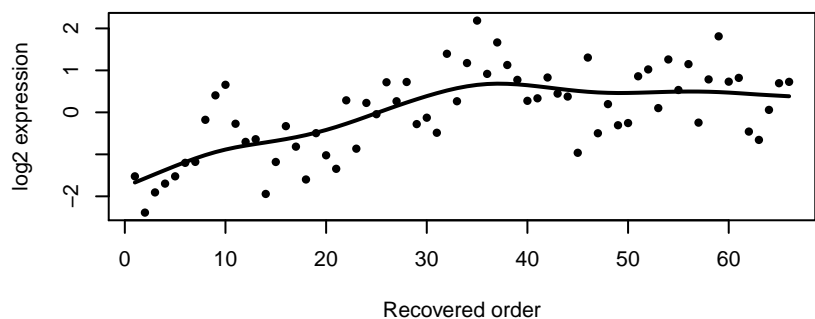**Atp5g1**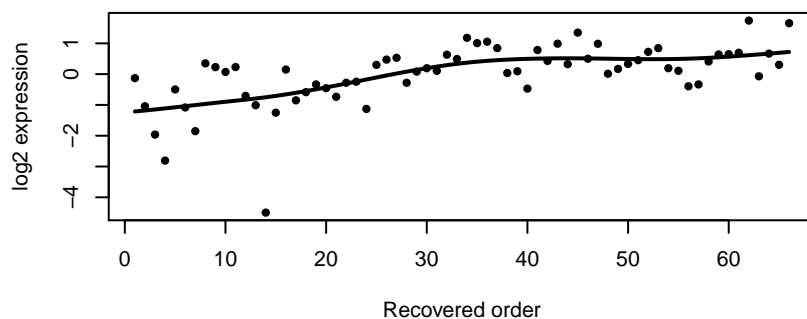

**Aadac**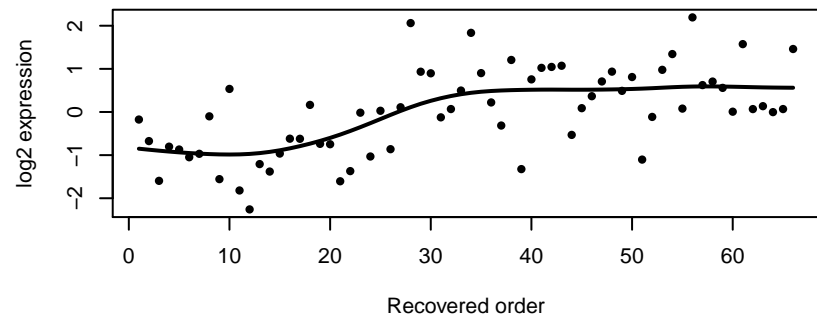**Rdh9**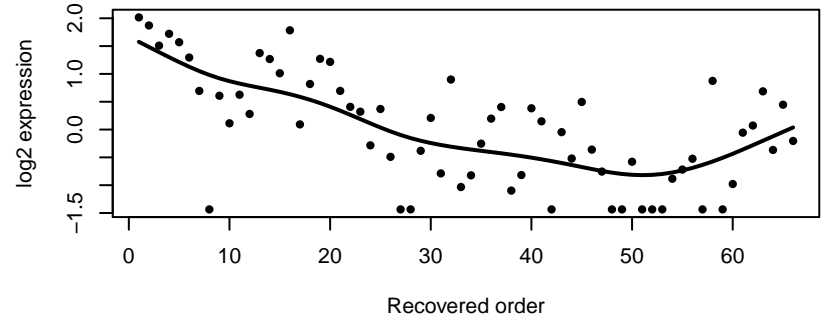**Lpl**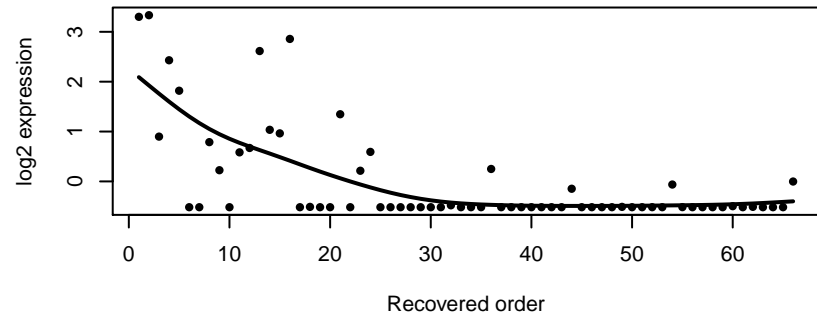**Rdh7**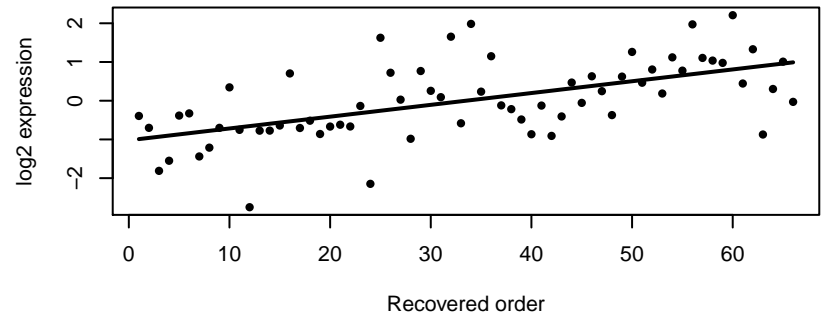**Myh9**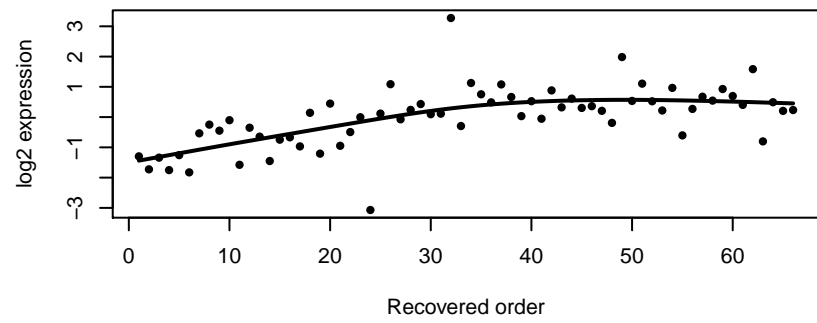**Cpox**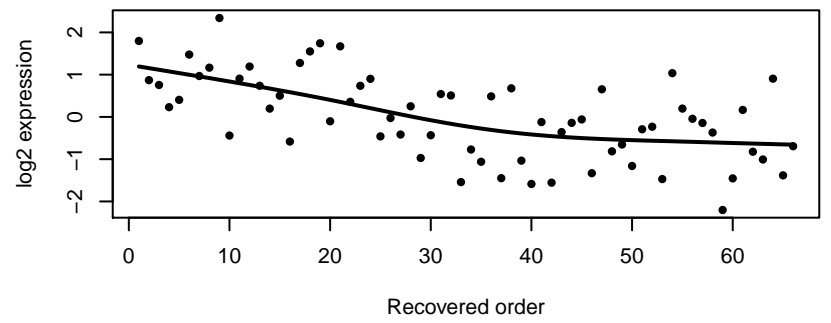**Hc**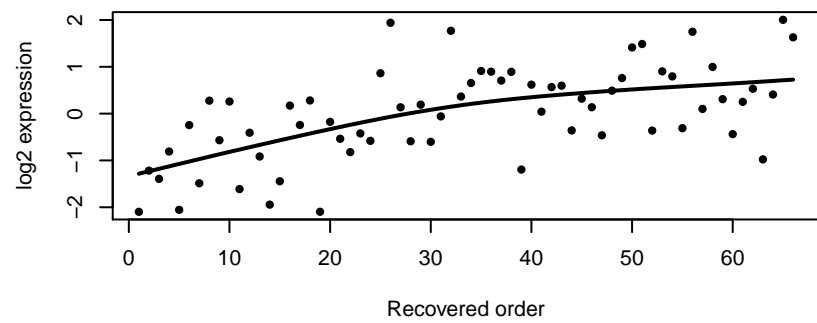**Mup16**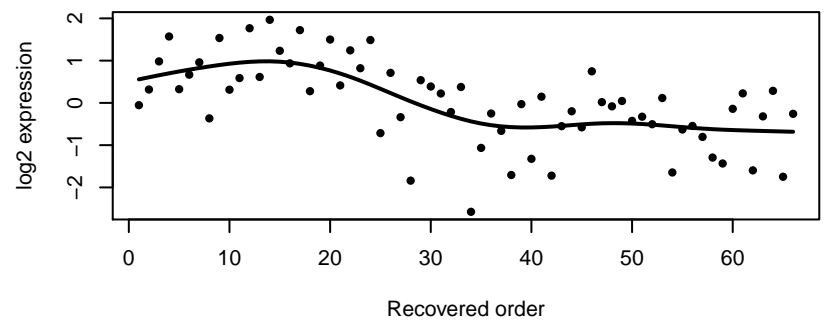**Tmem256**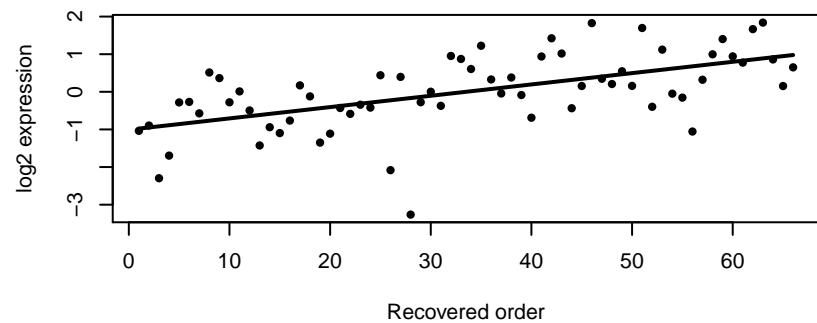**Gcnt2**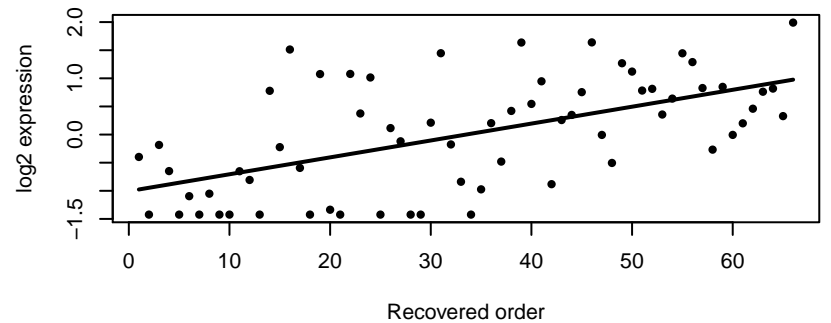

**Mdh1**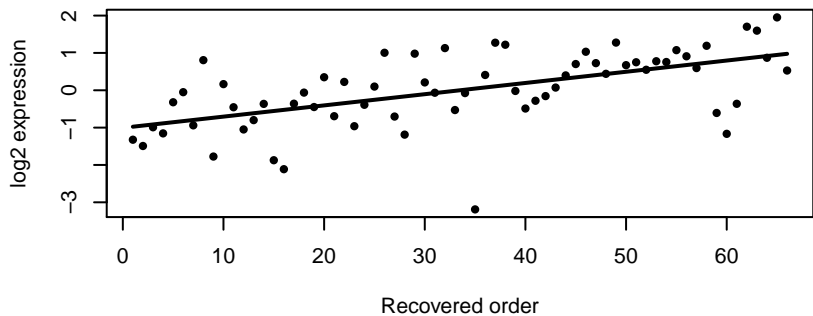**Lgals9**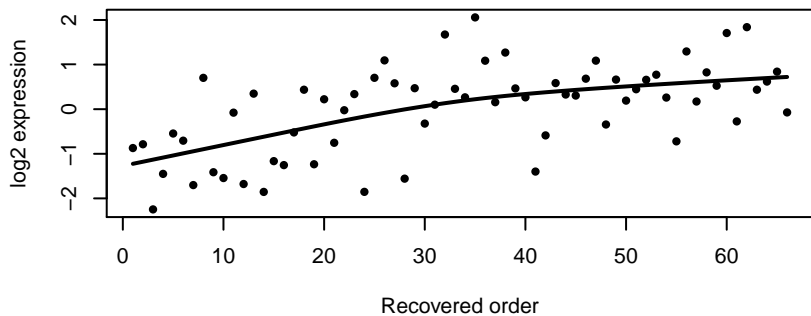**Apon**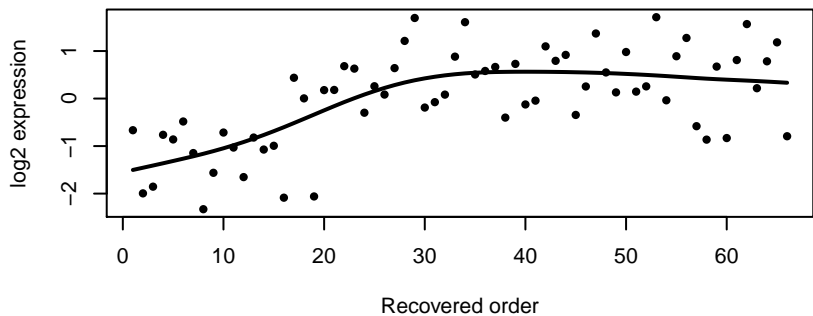**Cml1**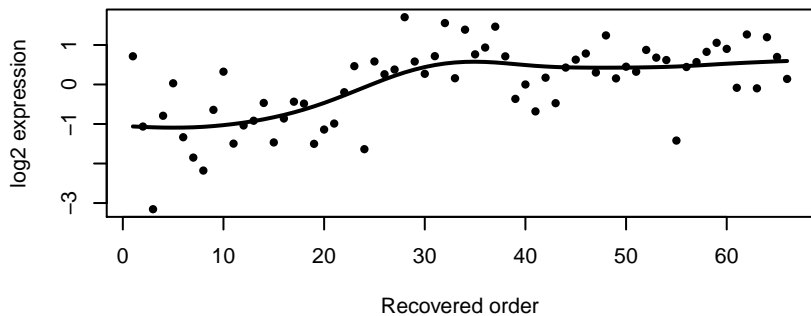**Cyp3a13**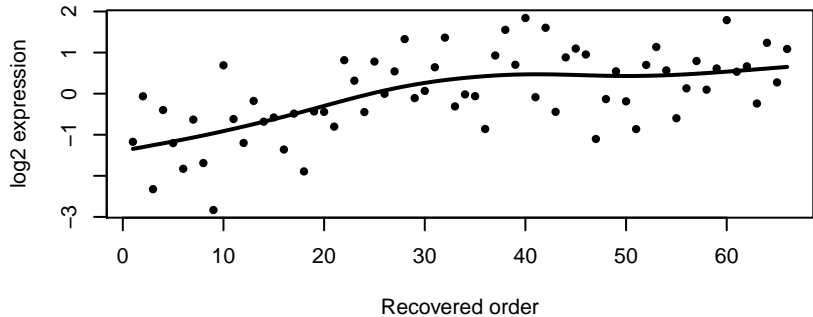**Syt1**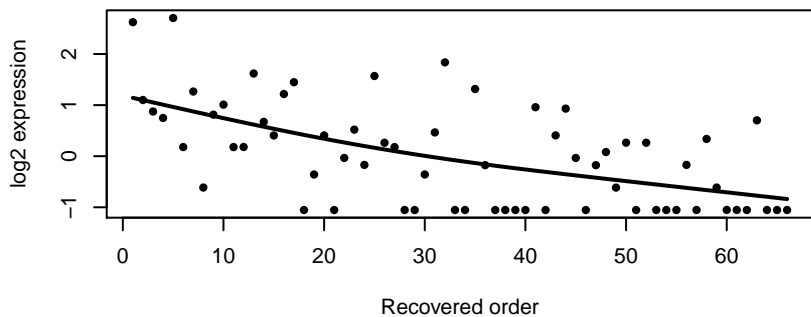**Chpt1**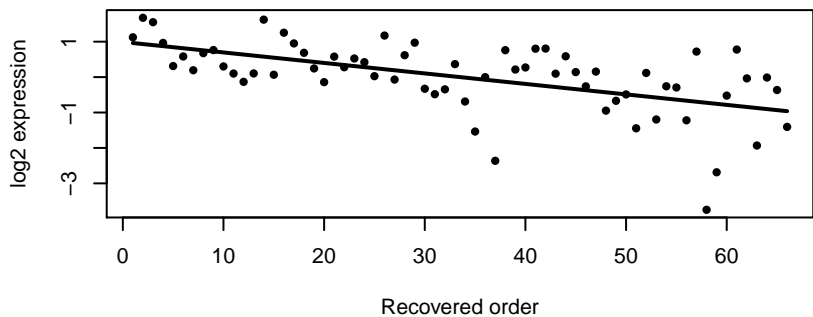**Celf2**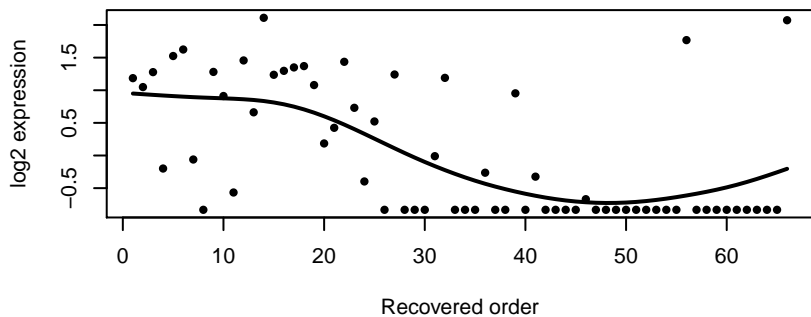**Pde4b**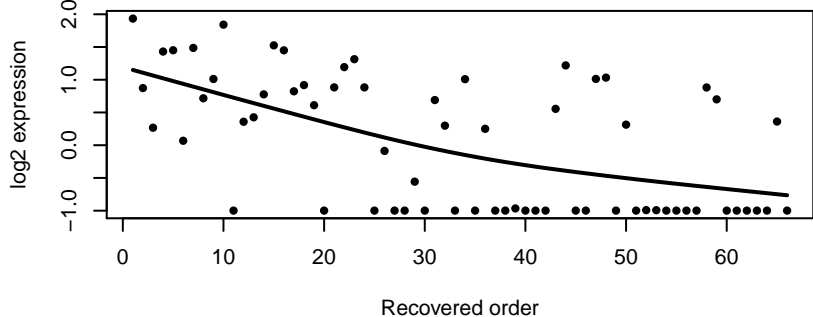**Rdh16**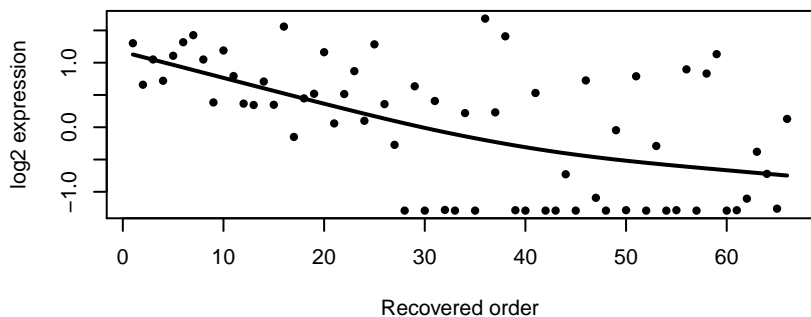

**Itih2**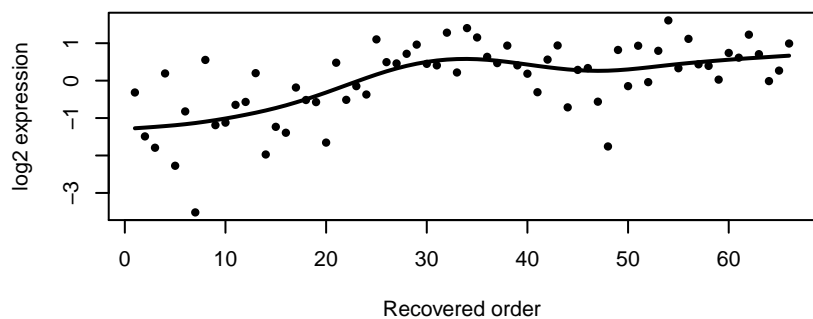**Tat**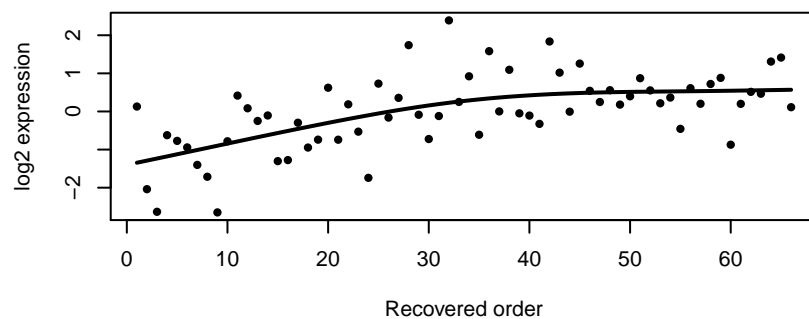**Lgr5**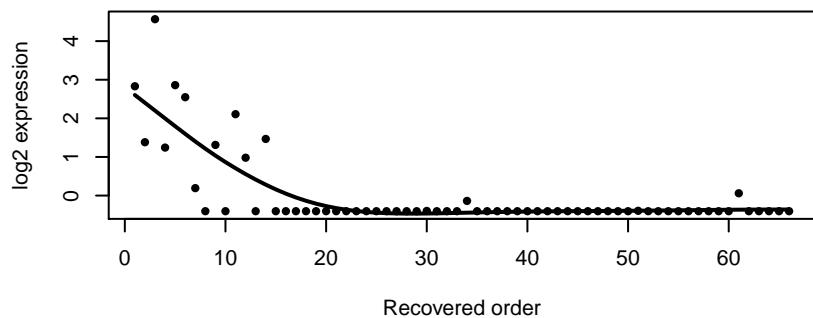**Fam89a**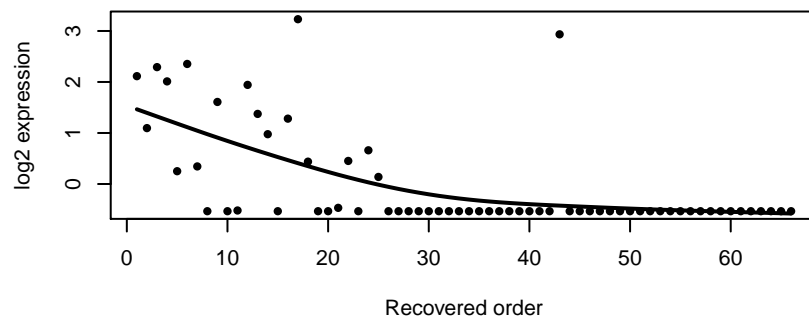**St3gal5**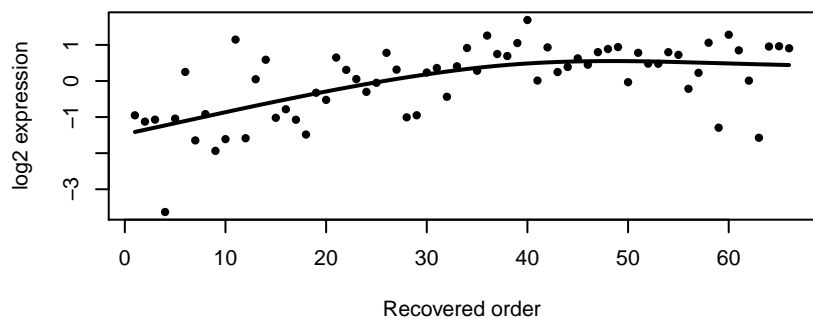**Cd36**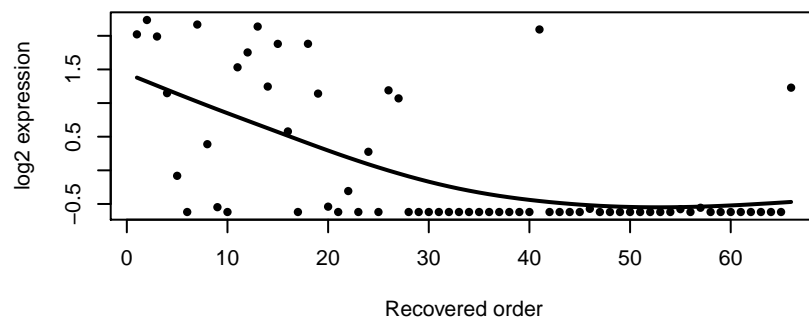**Mup11**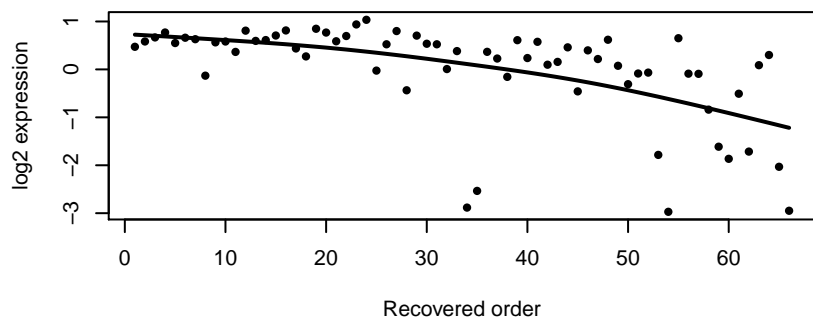**Copz1**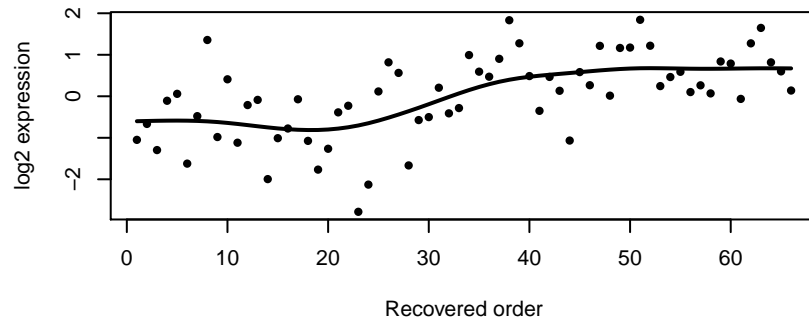**Gm11127**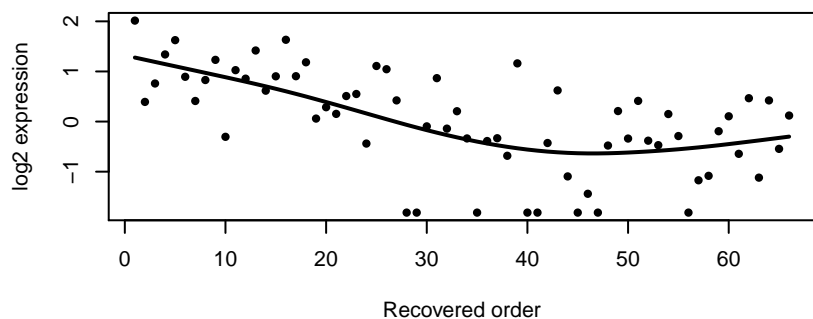**Ptma**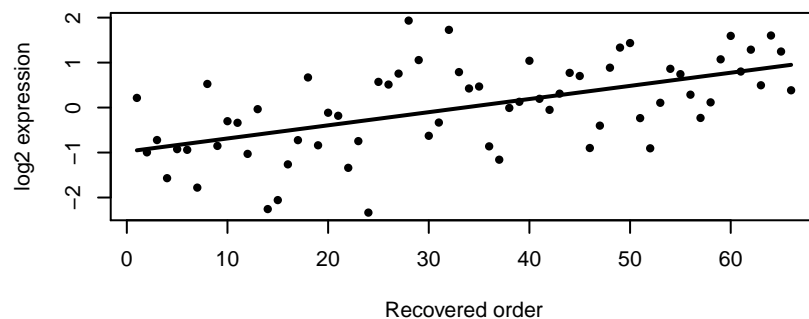

**Serpinf2**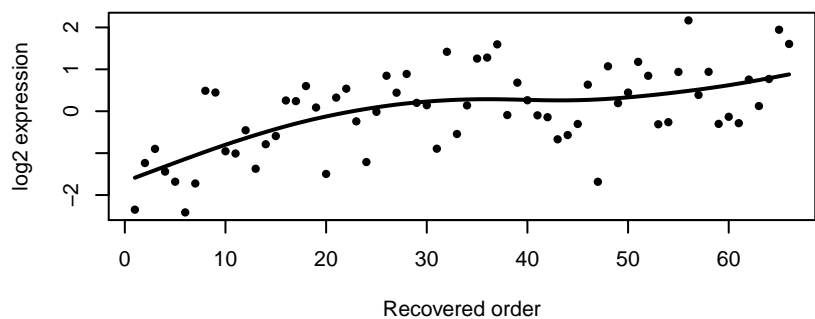**Car3**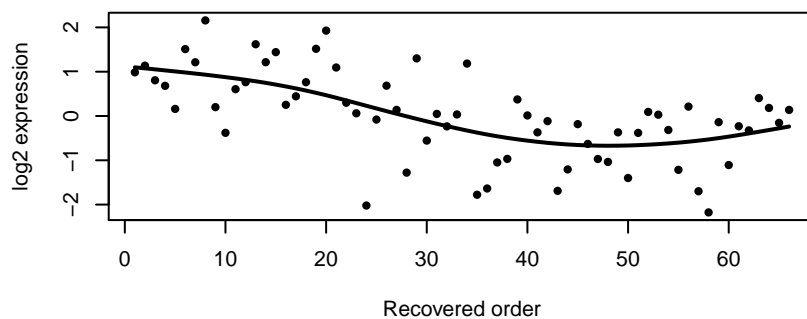**Esco2**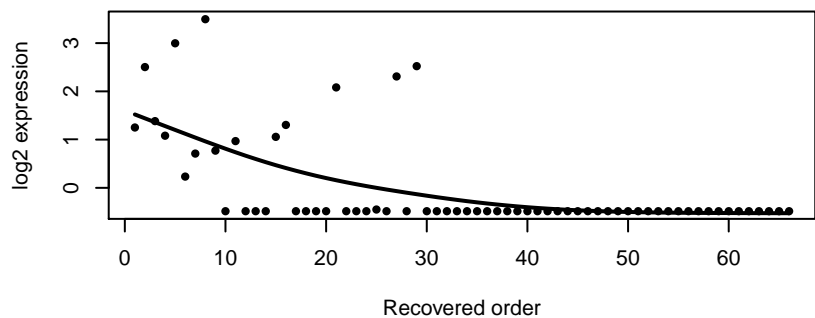**Agxt**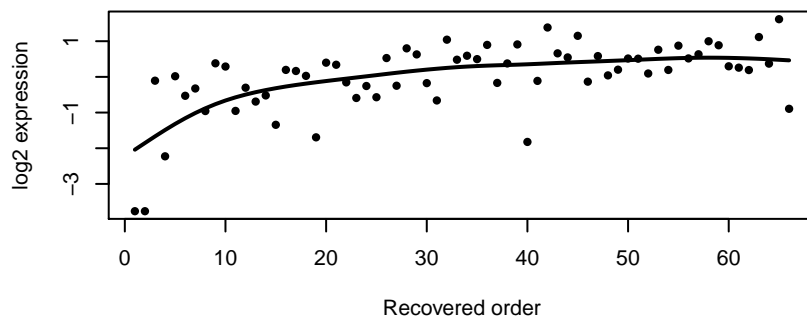**Acly**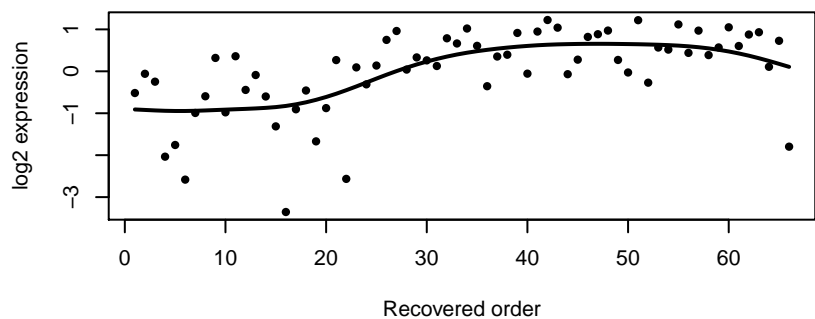**Sdc4**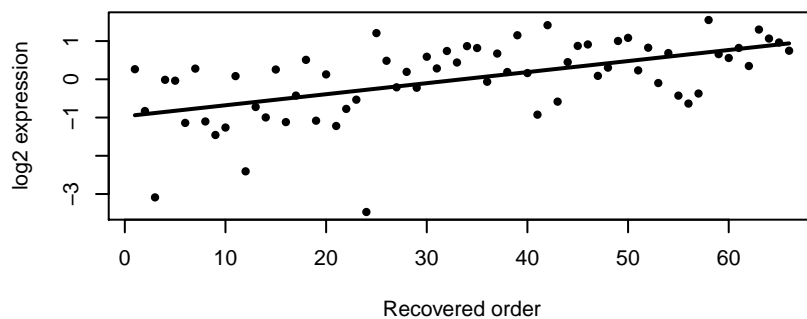**9030619P08Rik**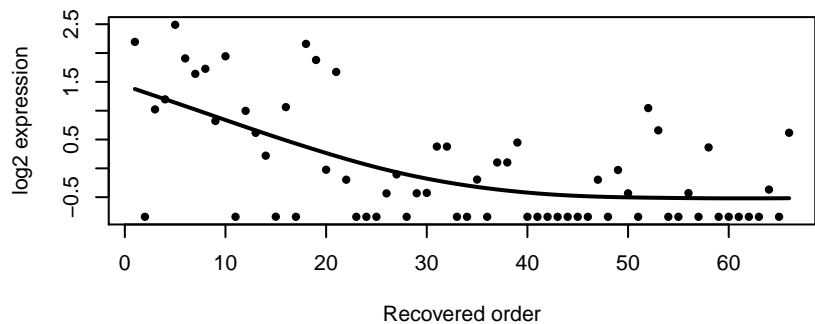**Elovl3**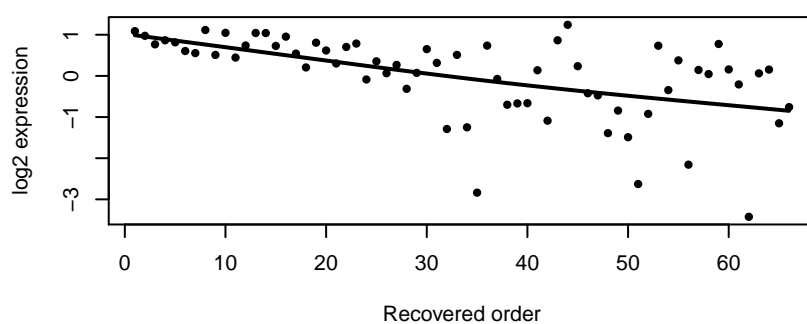**Herpud1**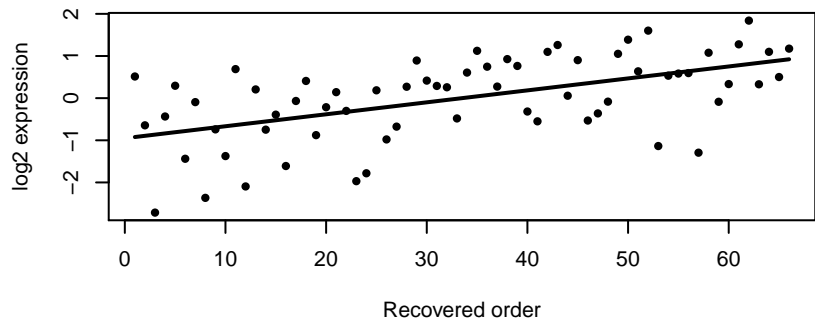**Tars**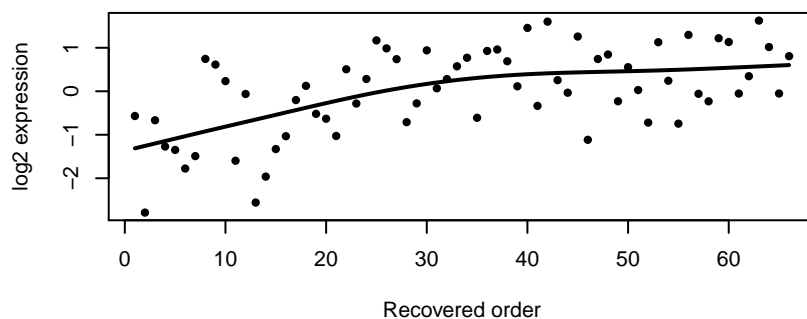

**Gm4788**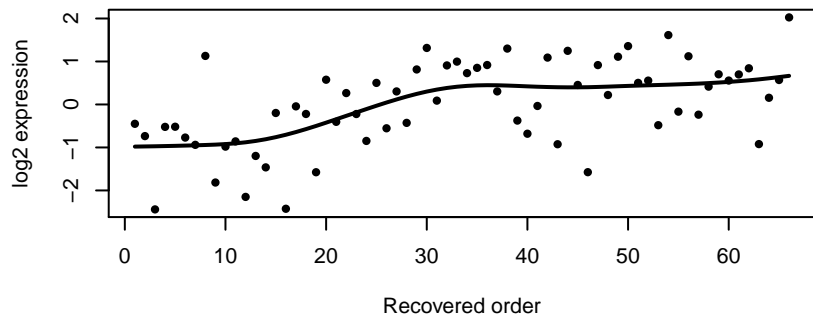**Sat1**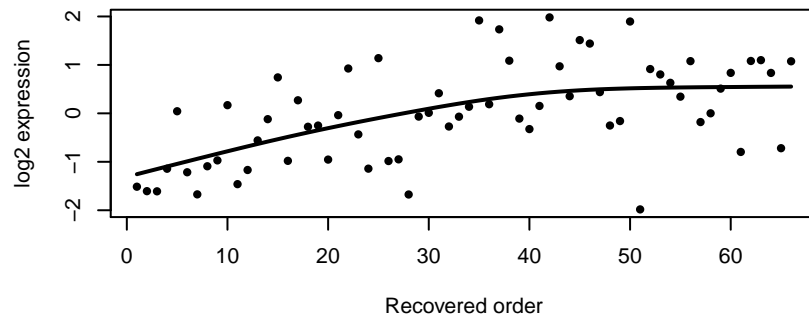**Gjb2**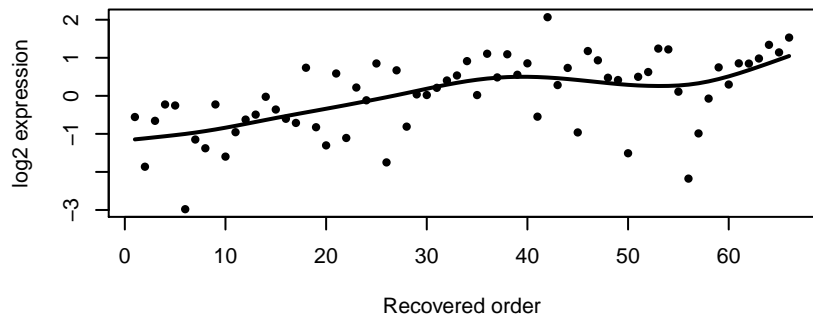**Trf**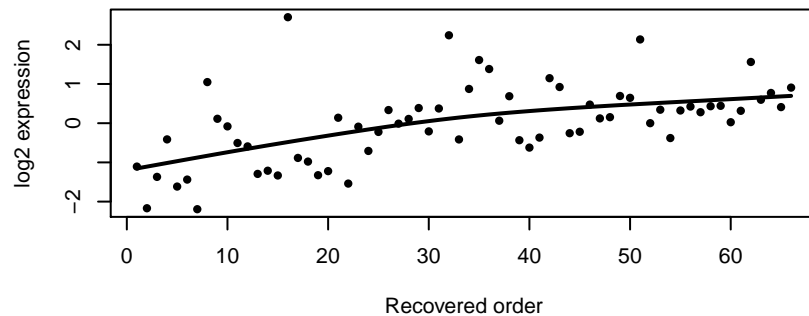**Cox7a2**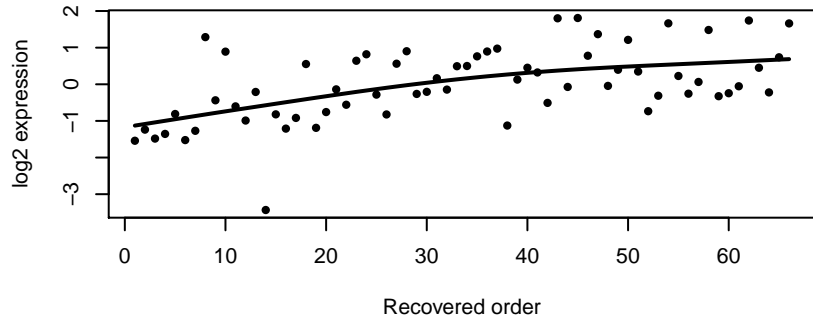**Dak**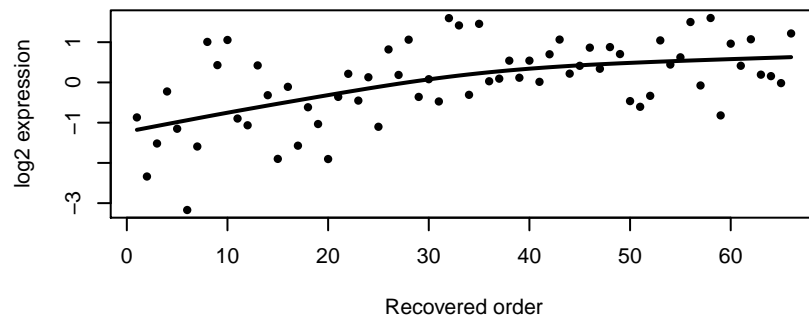**Aqp8**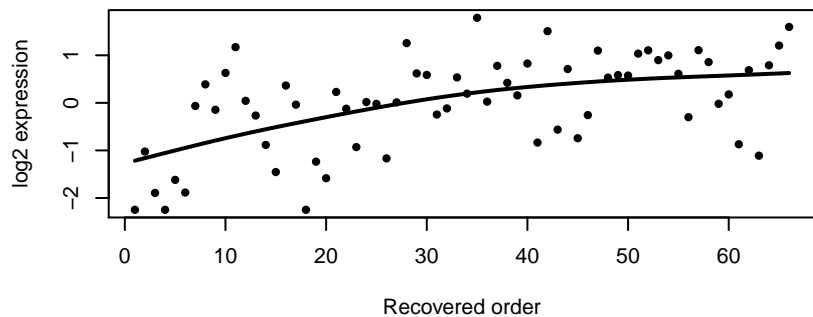**Mup18**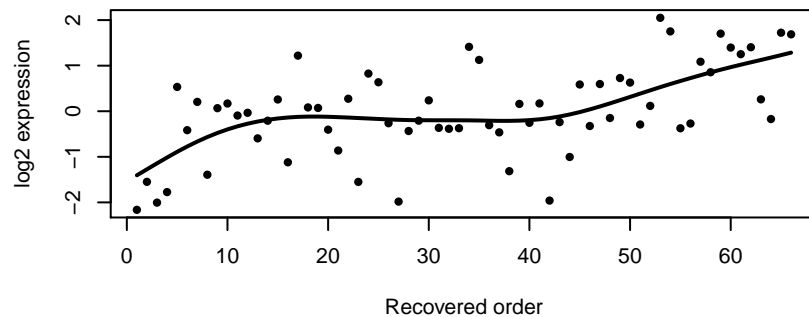**Ndufa12**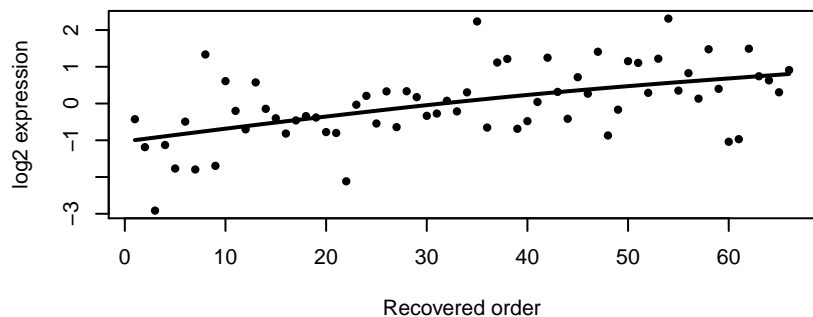**Slc13a3**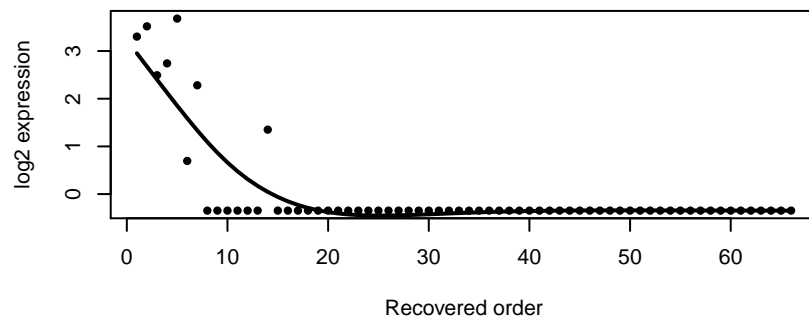

**Serpina12**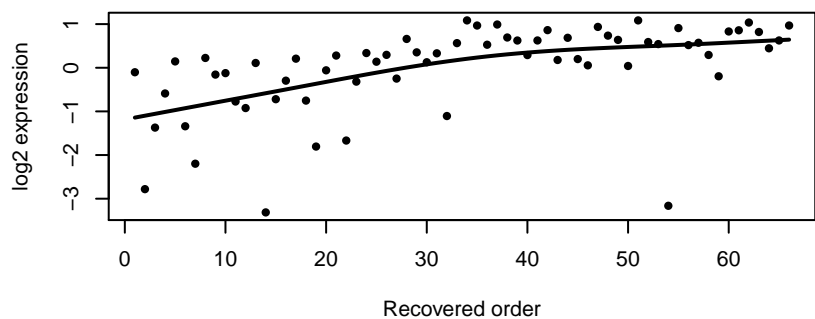**Por**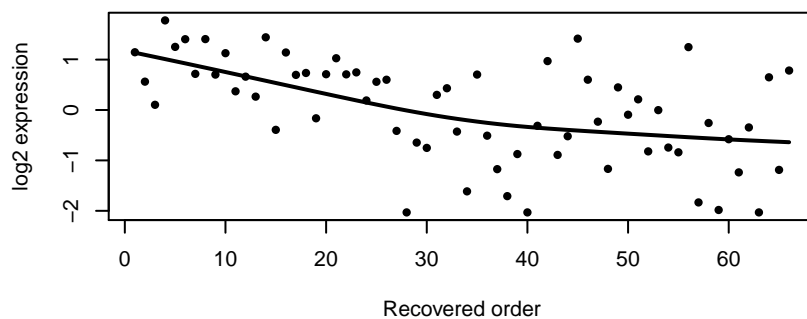**Phldb2**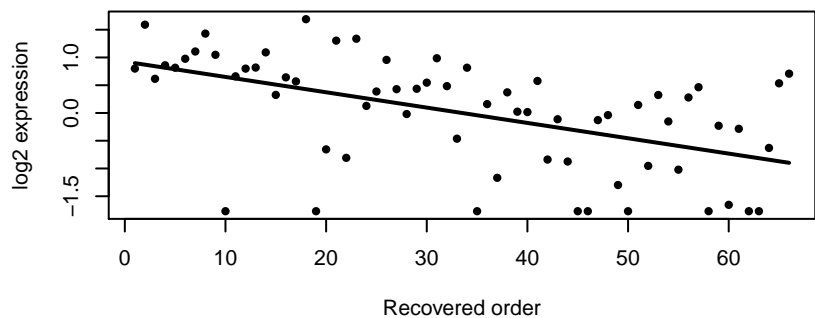**Tnfaip81l**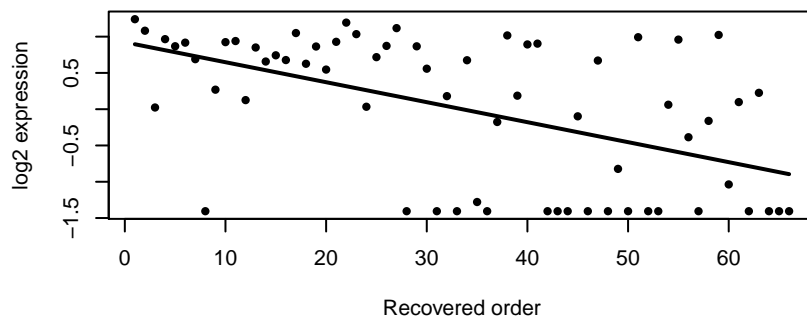**Slc25a51**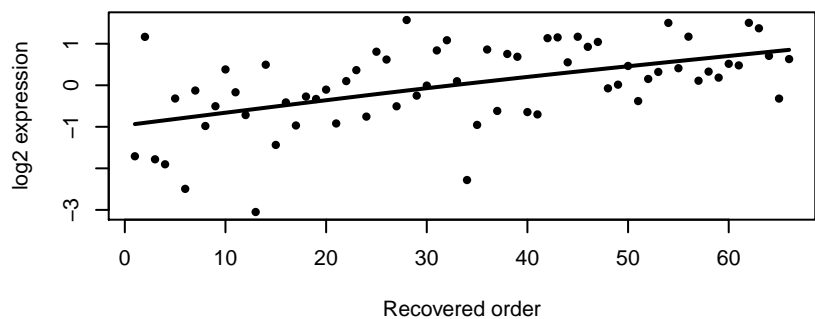**Atp5o**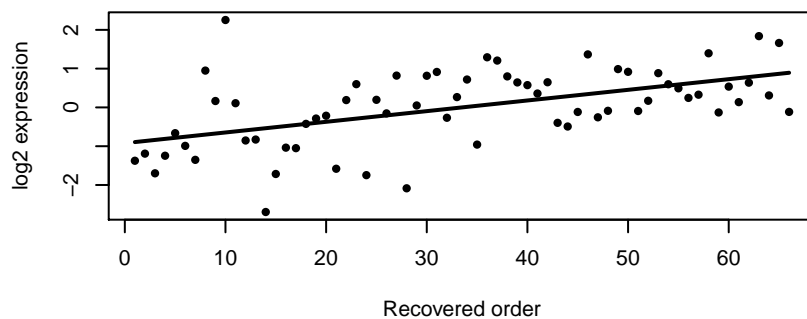**Agt**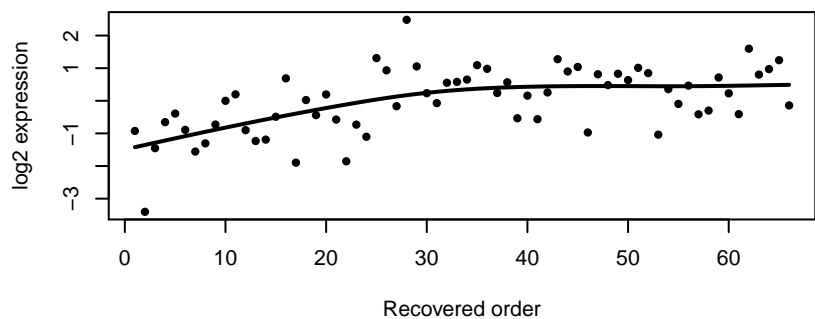**Itih3**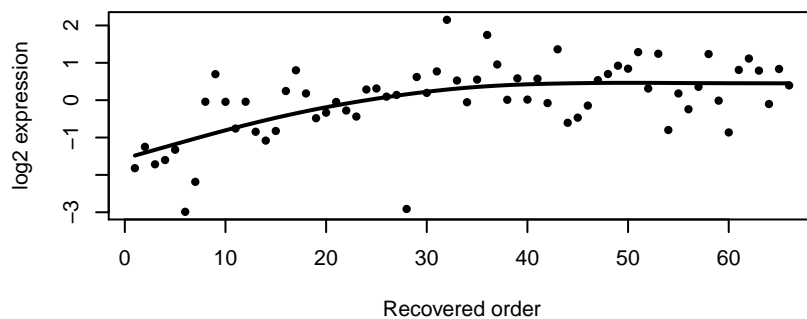**Tspan31**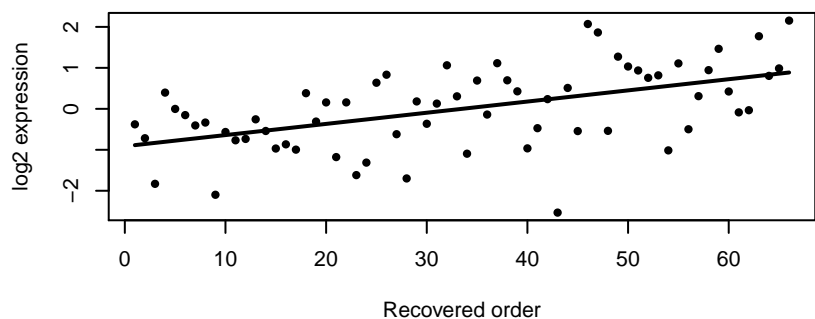**Ncald**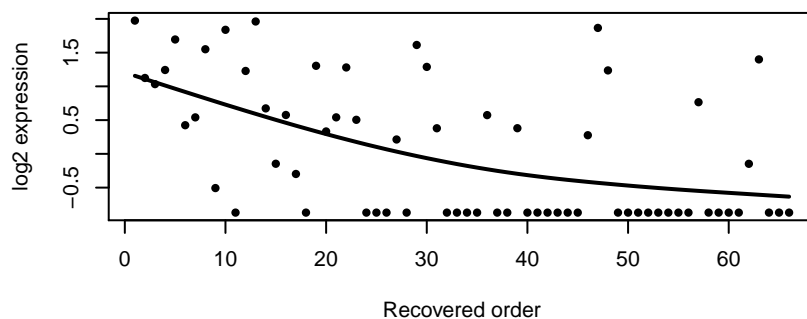



**Cyp39a1**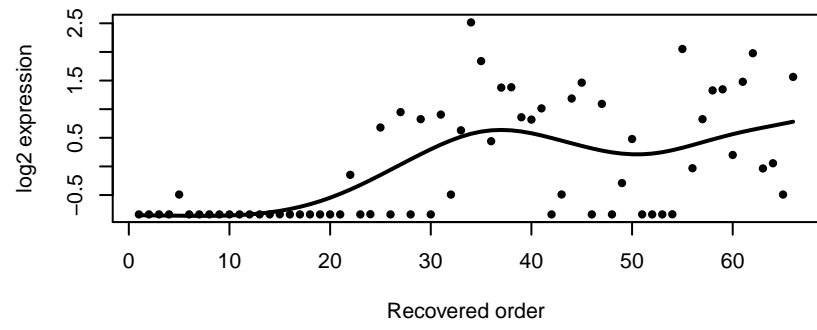**Nnmt**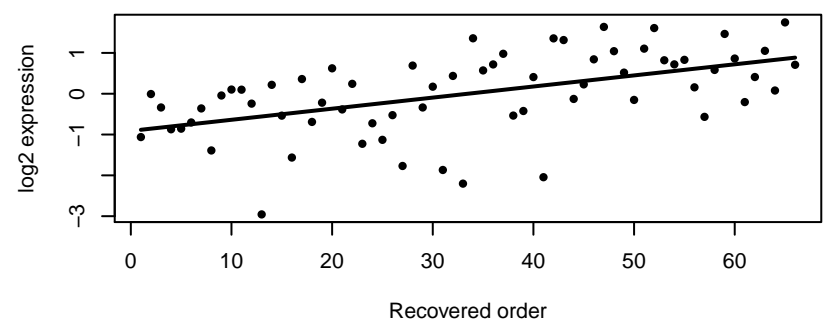**Sc5d**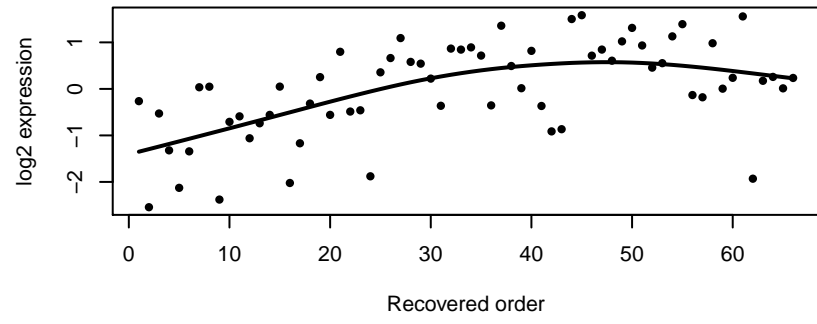**Cib3**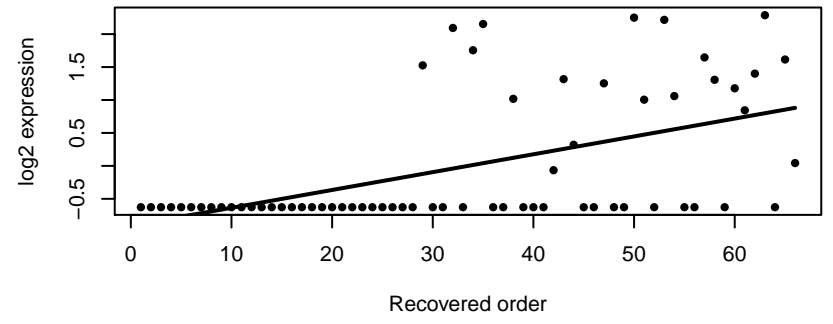**Maob**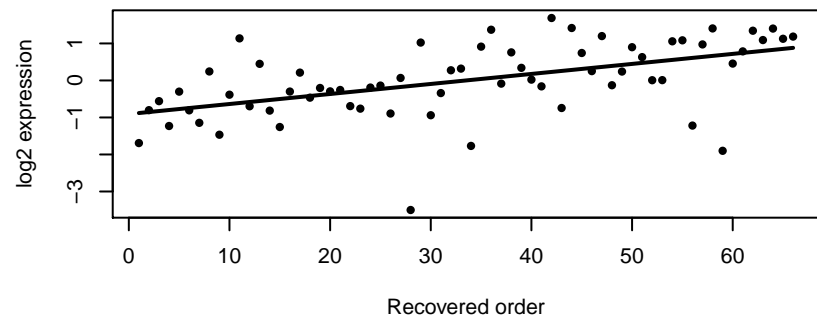**Zap70**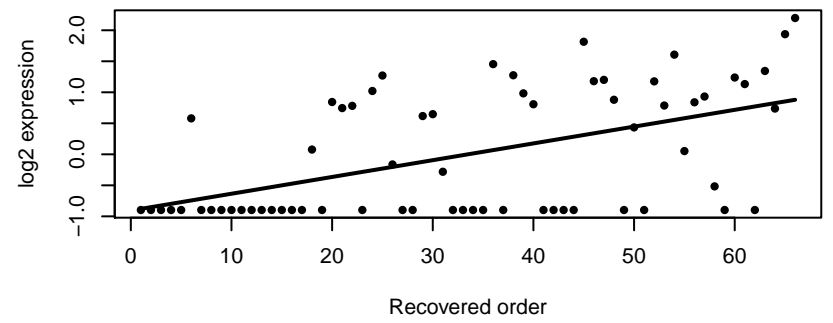**Acaa1b**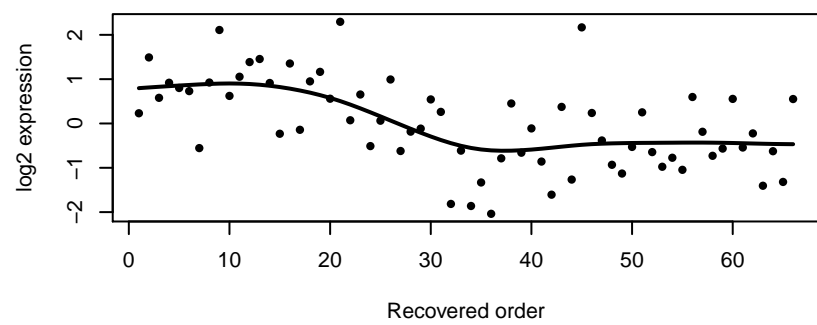**Hpgd**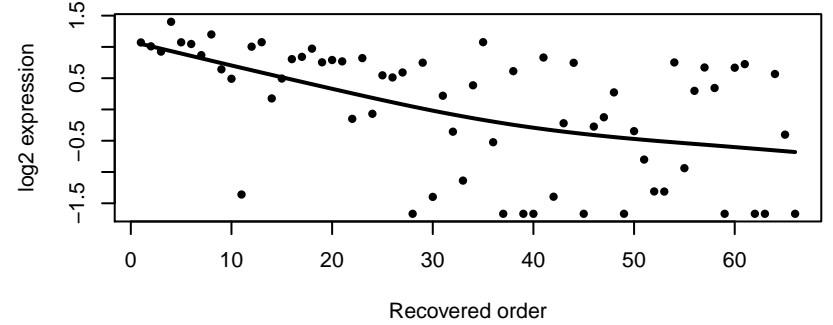**Lpin1**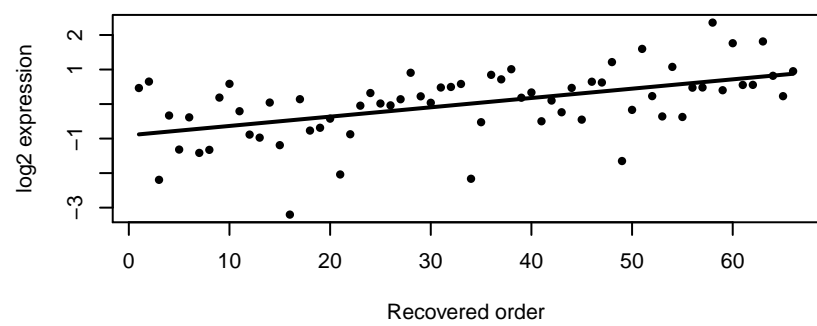**Ndufa13**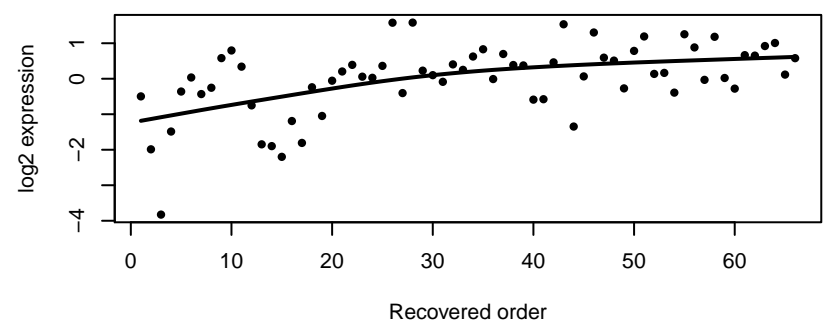

**Hmgcs2**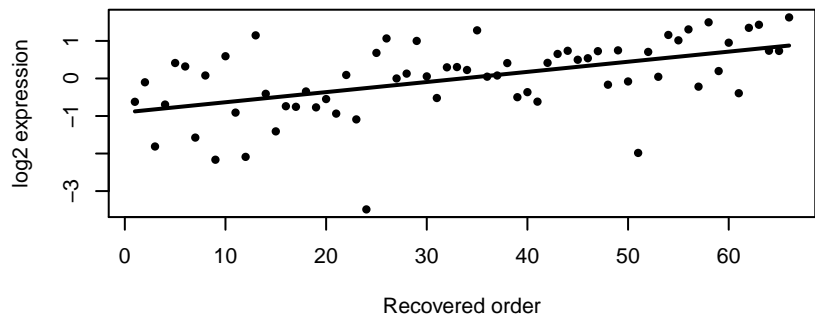**Cyp2a4**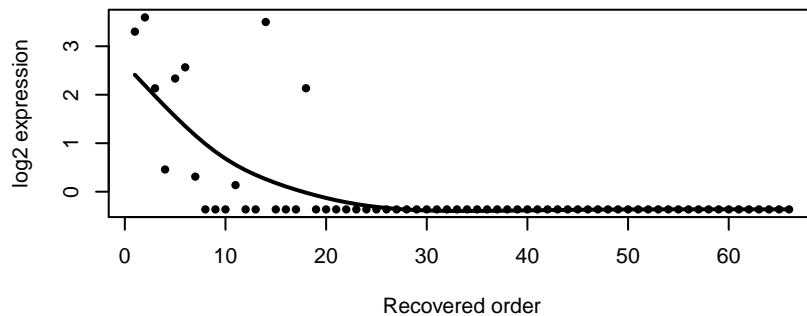**C9**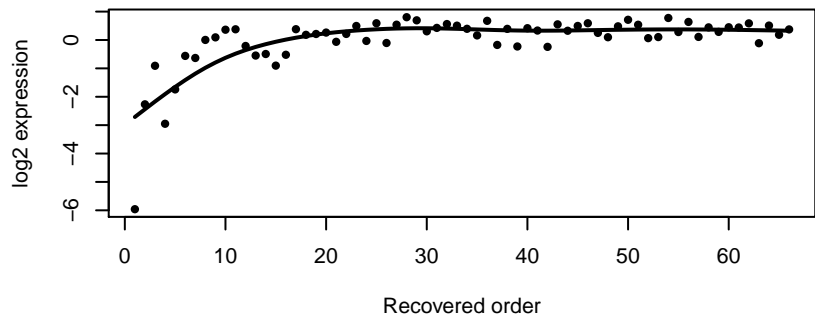**Tiam2**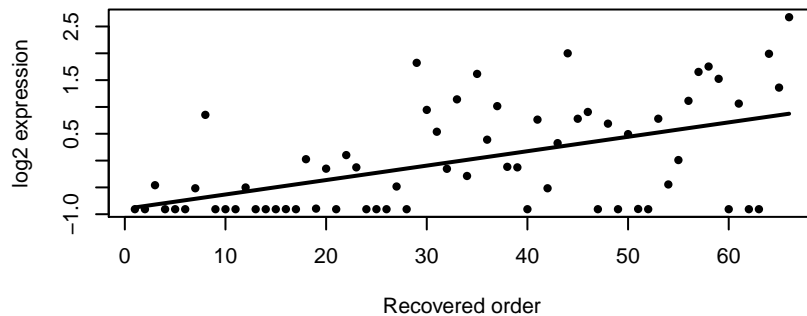**Zfp750**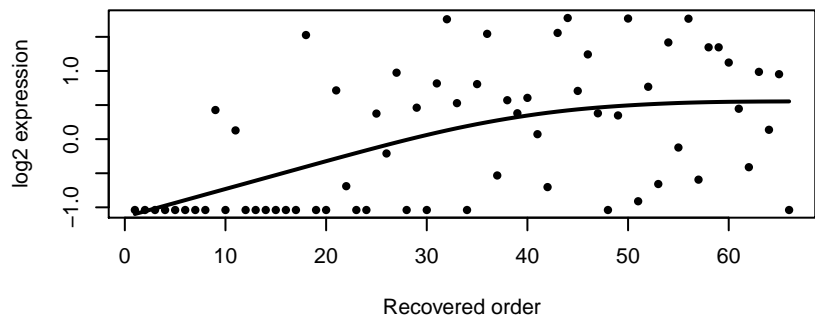**Ndufb4**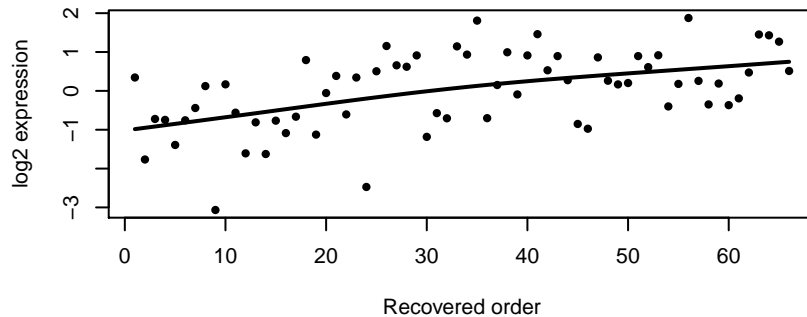**Tpi1**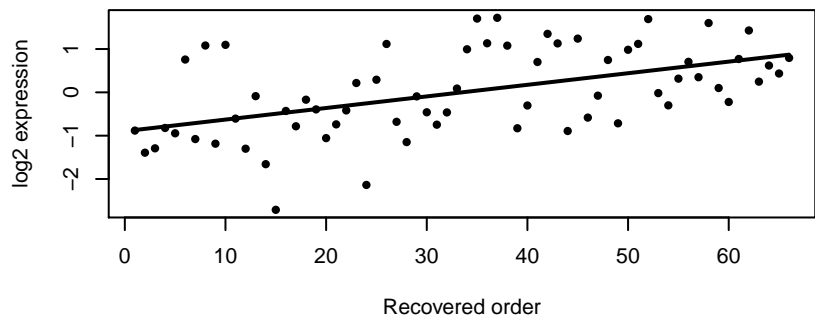**Endog**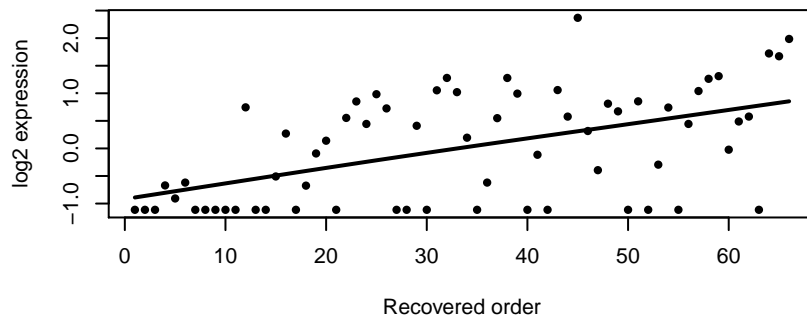**Egln3**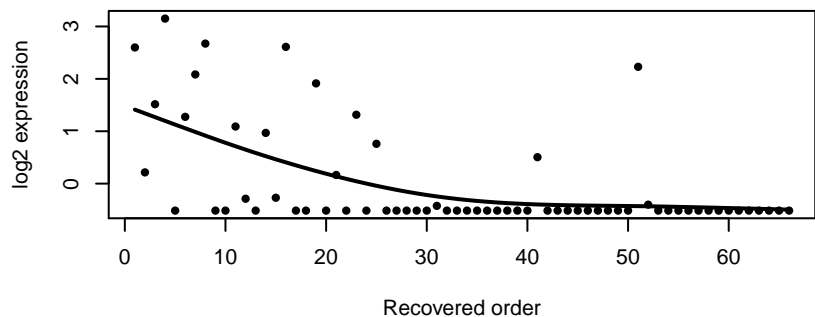**Tmem243**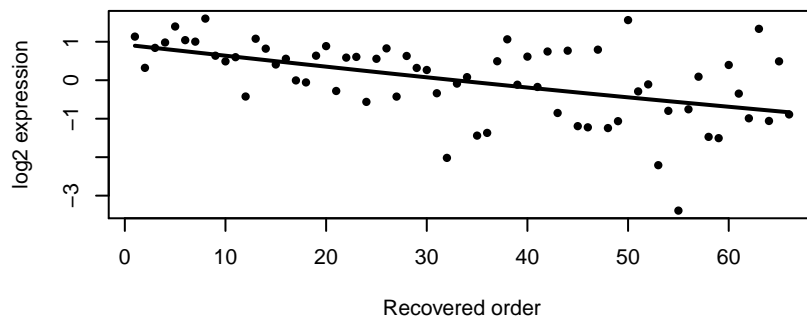

**Alcam**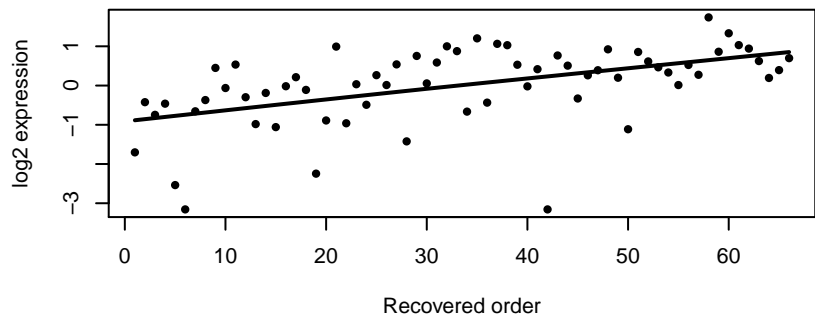**Ndufa5**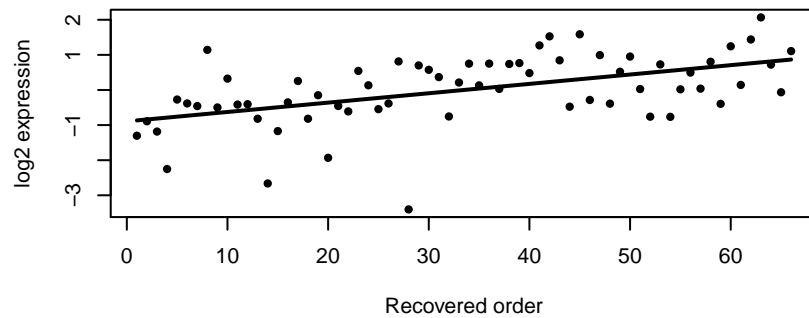**F10**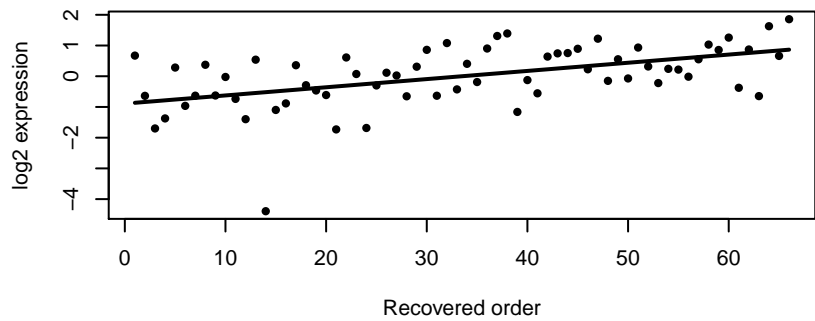**H2-D1**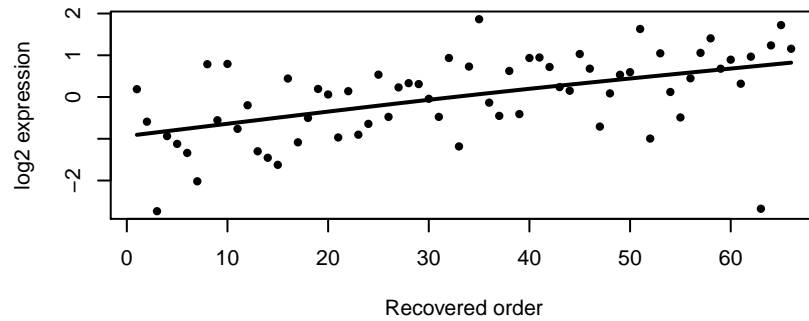**Al182371**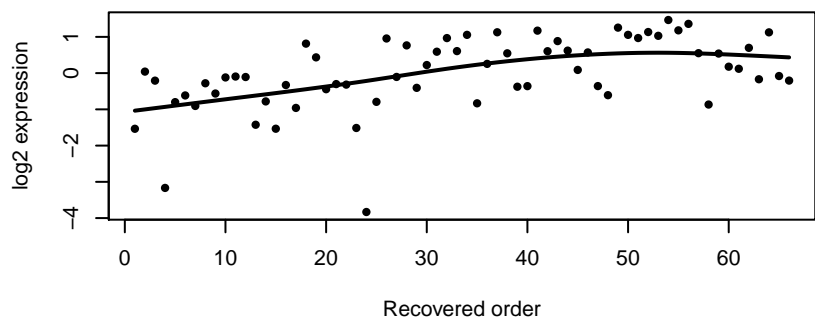**Sds1**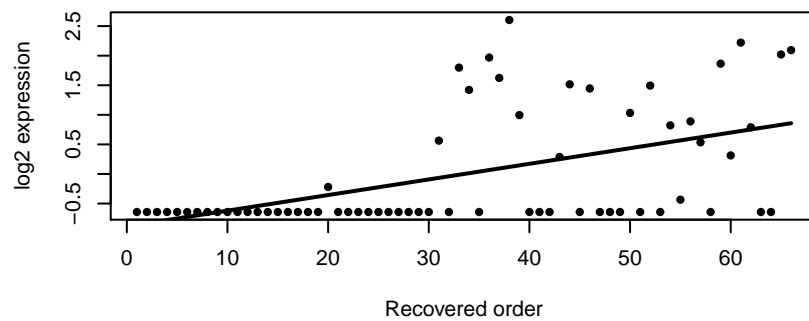**Irf2**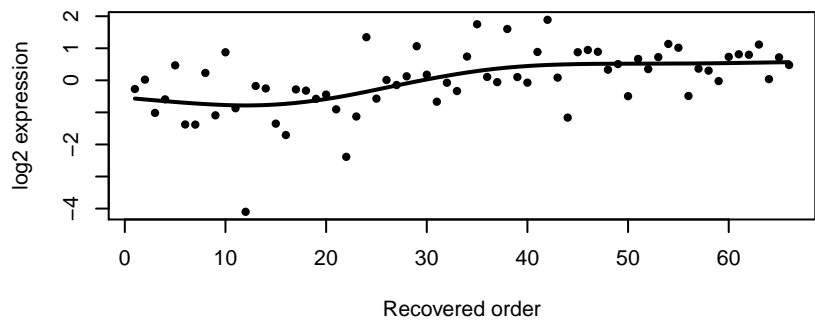**Fam25c**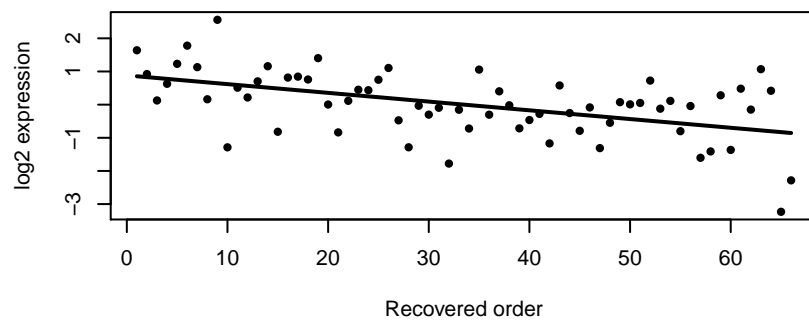**Cyp27a1**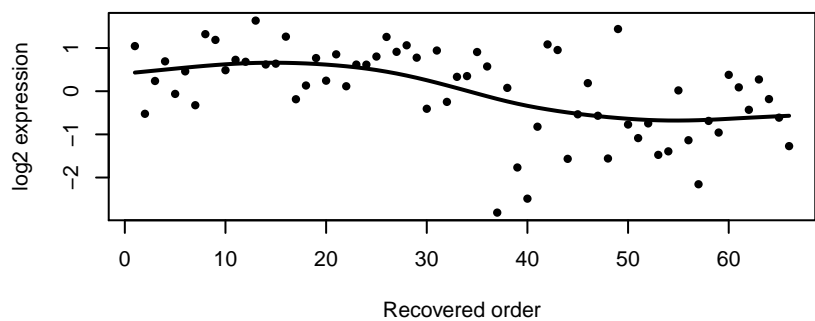**Slc19a2**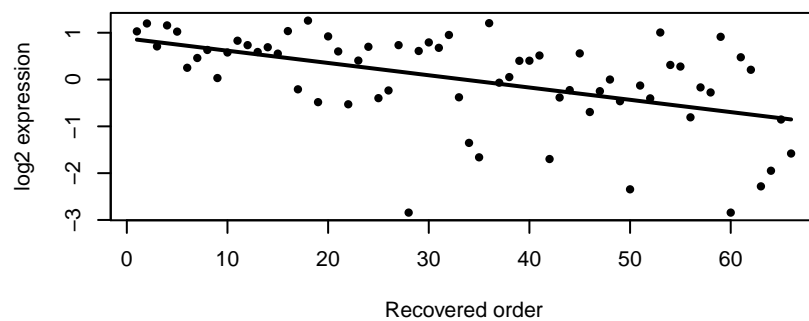

**Lap3**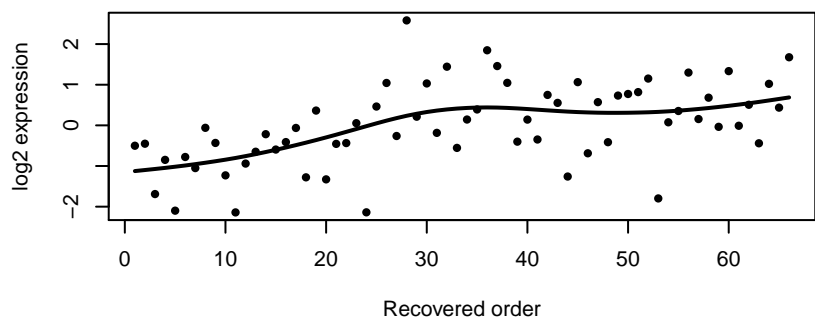**Slc38a3**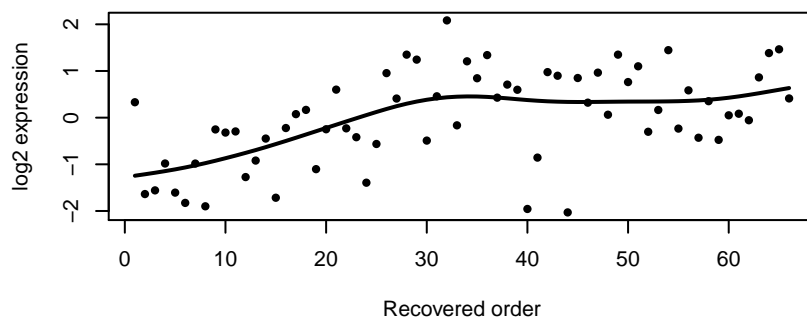**Fam46c**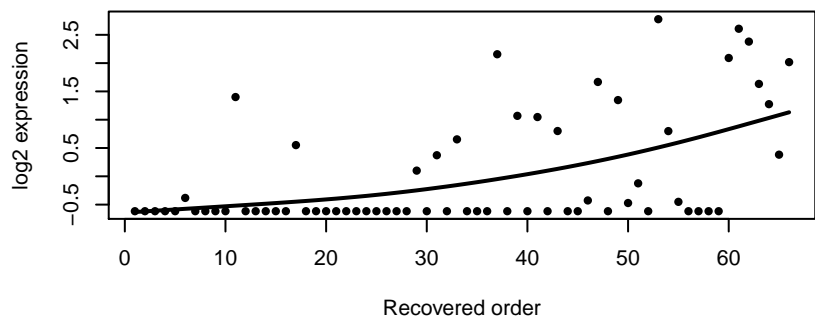**Sdhb**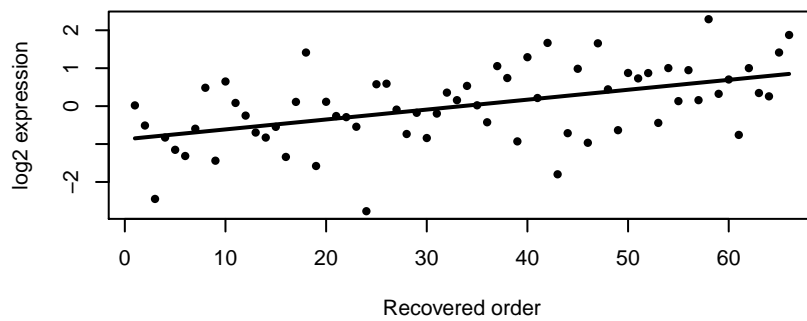**Mt2**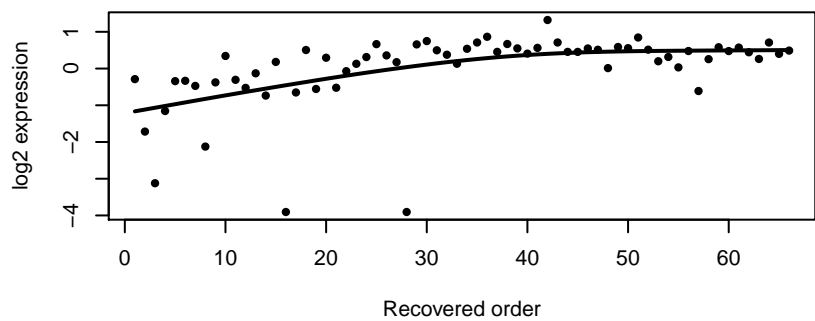**Tead1**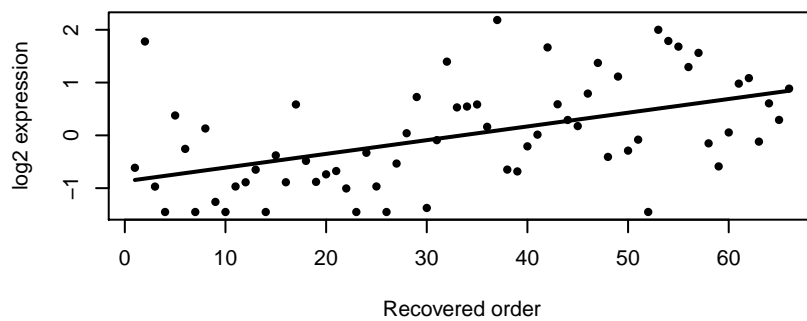**Cib2**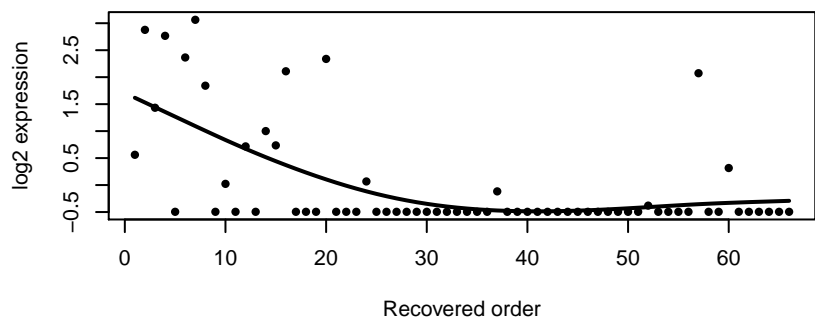**Plin2**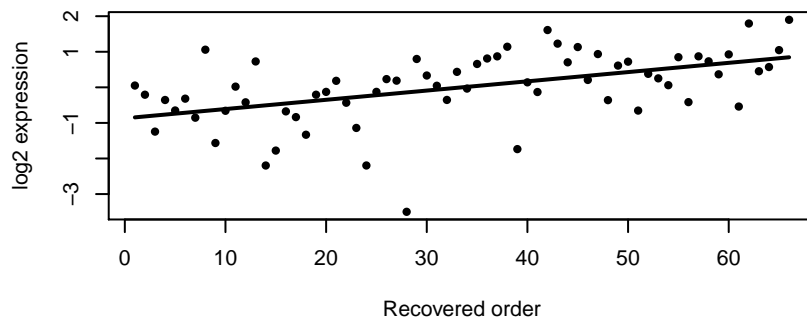**Rhbg**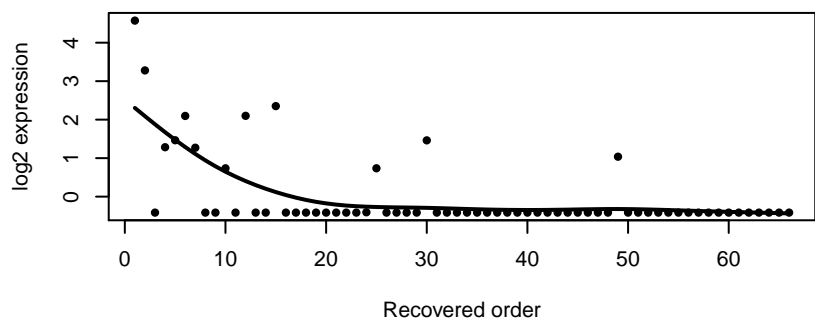**Aldh11l1**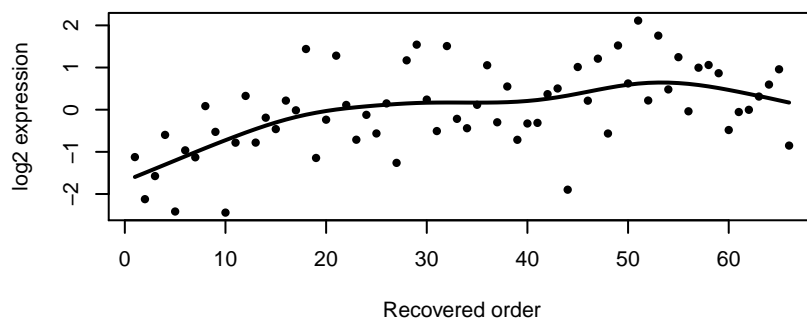

**Frmd4b**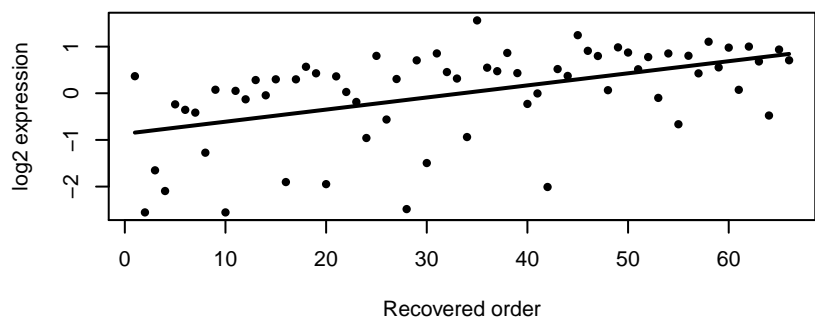**Ndufb9**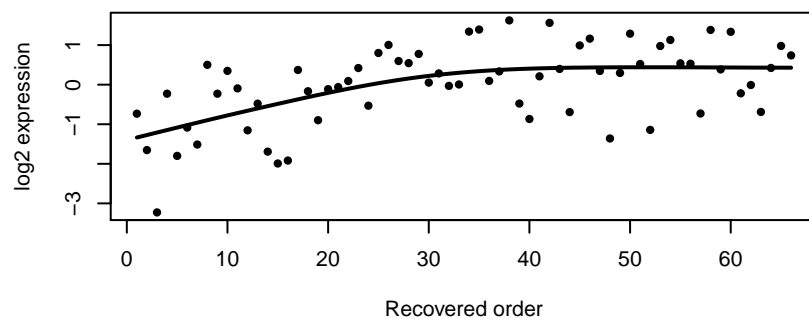**Cox5b**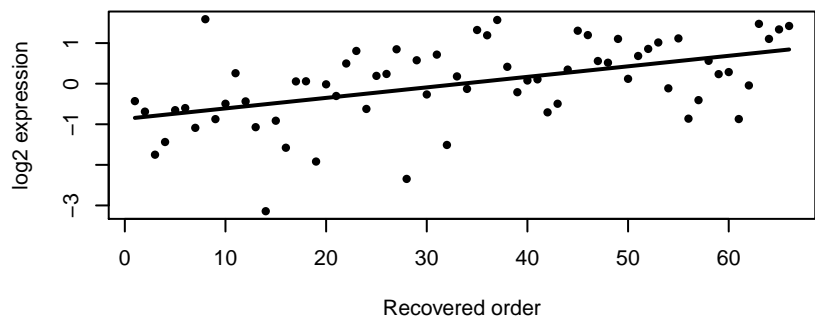**Serpina6**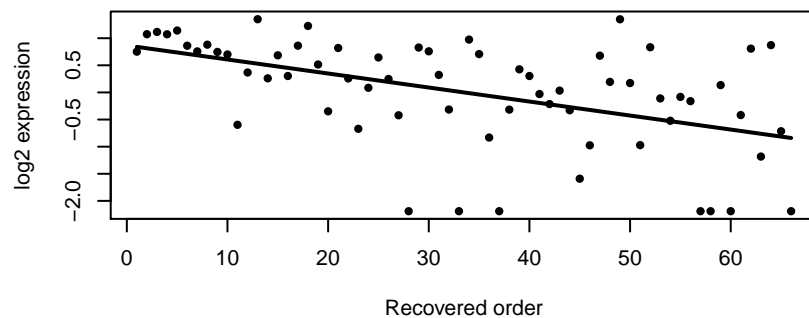**D630039A03Rik**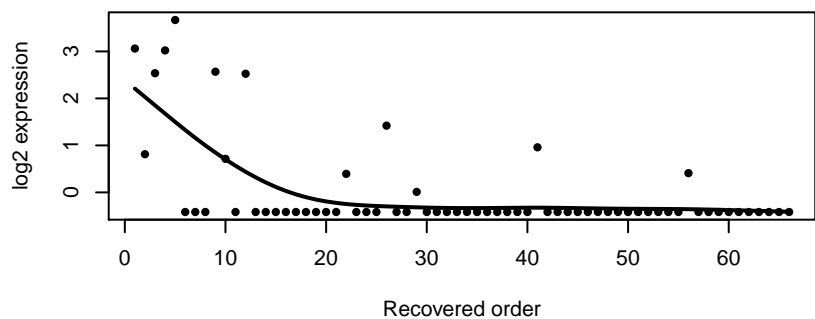**Tlr5**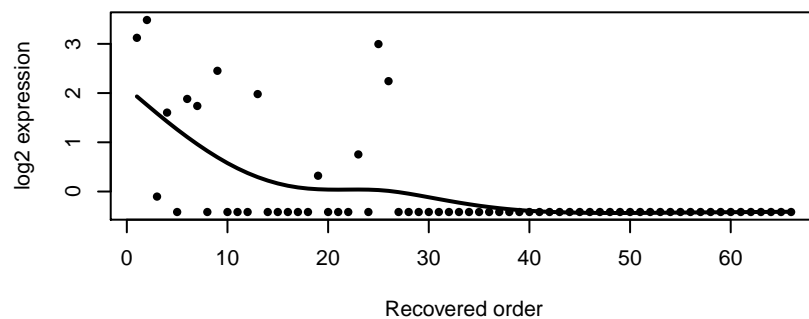**Hsp90b1**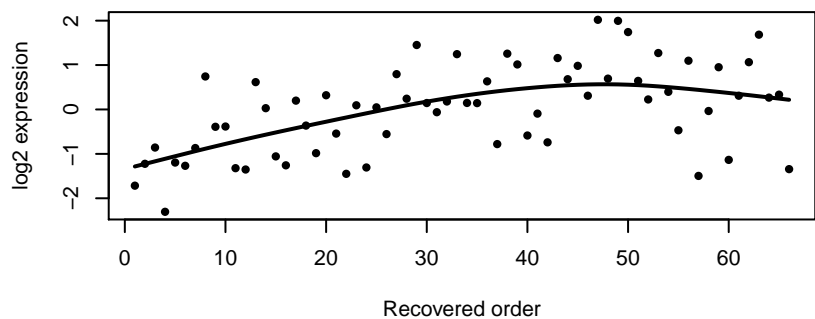**Ndufs6**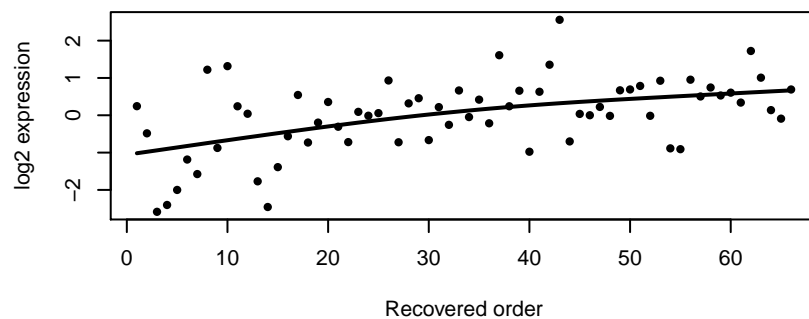**Fau**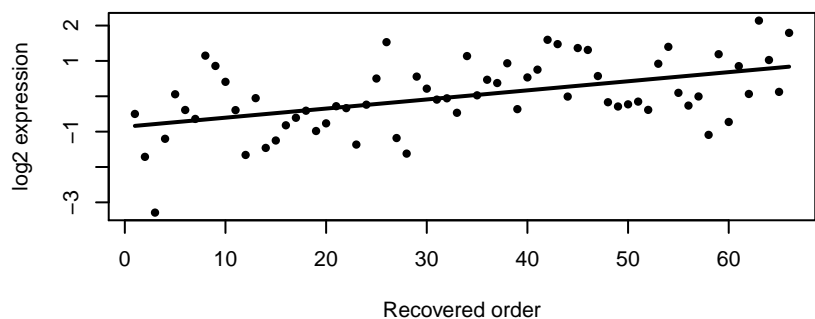**BC089597**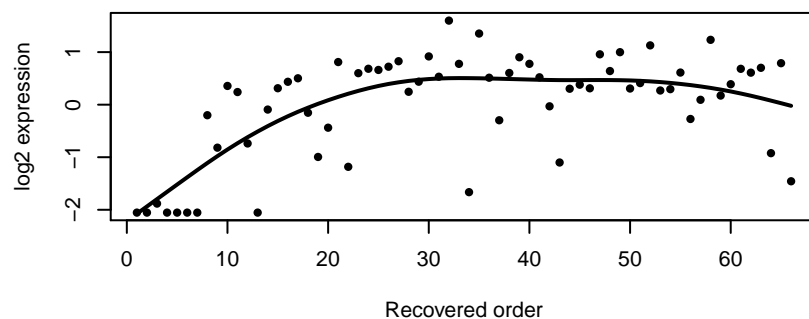

**Clstn3**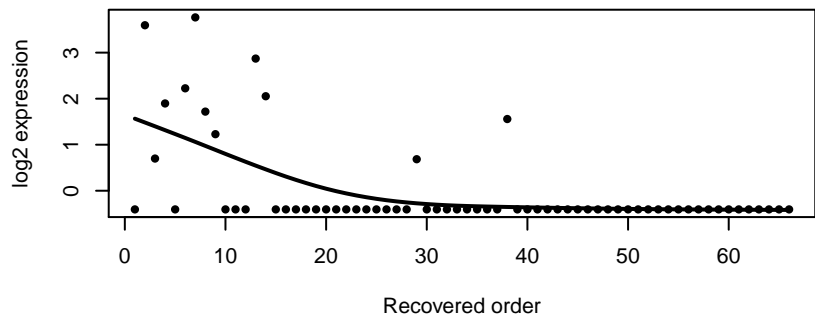**Atp5l**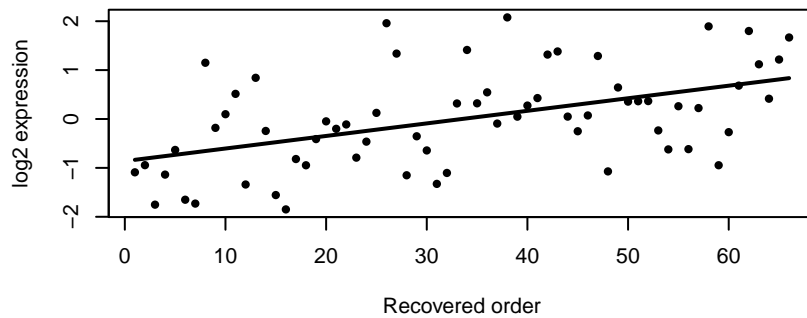**Atp5c1**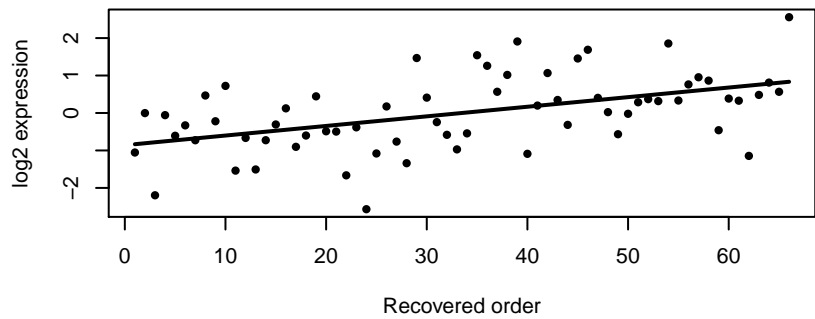**Slc22a1**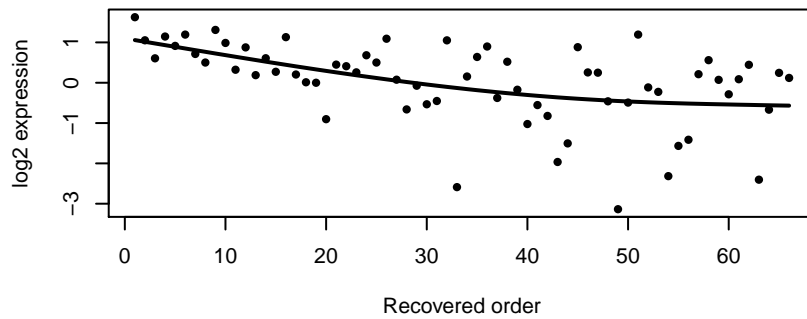**Slc1a2**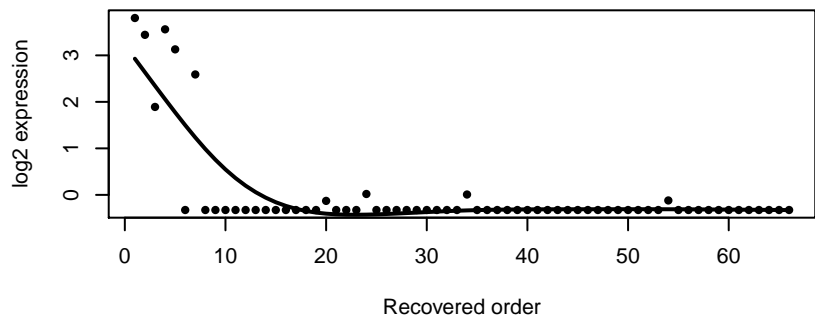**Sqrdl**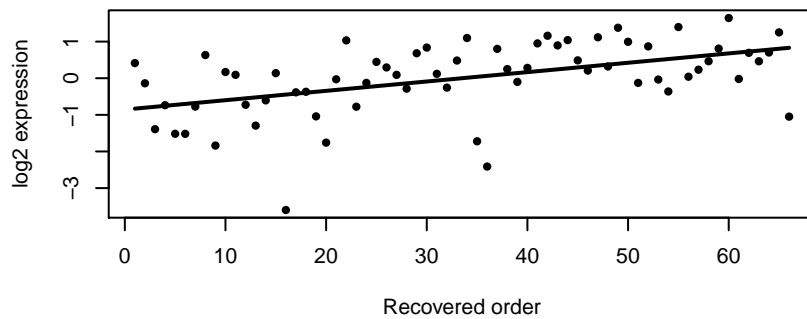**Cdo1**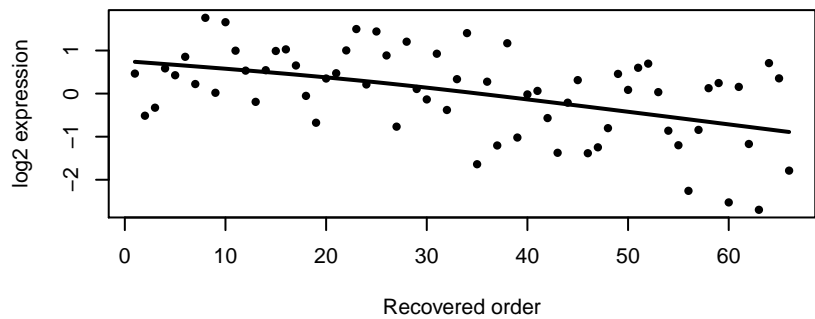**Acaca**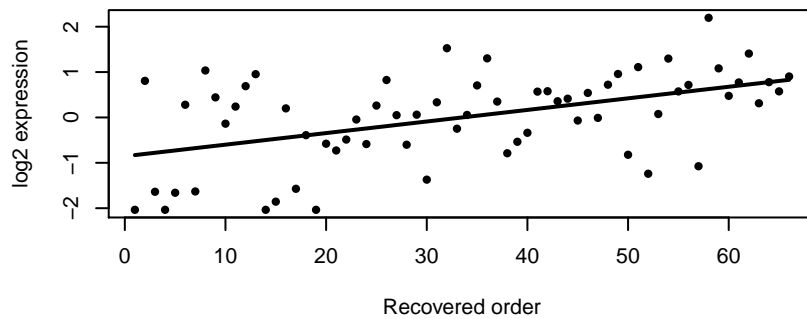**Prodh**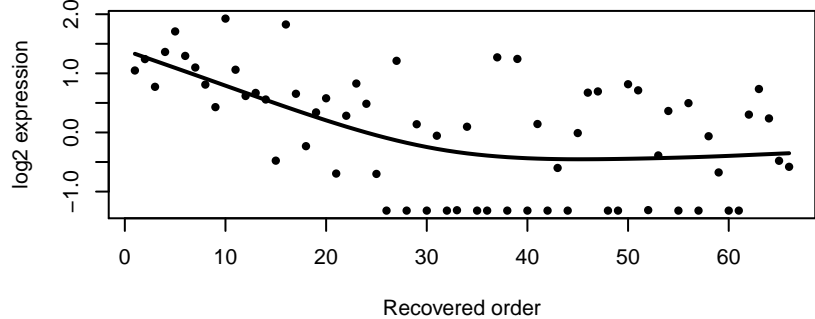**Atp5e**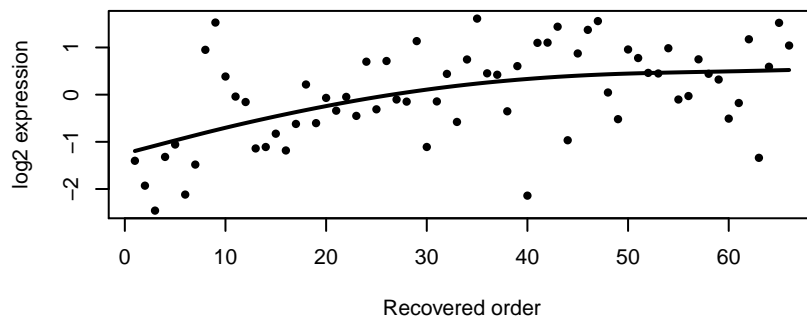

**Cox6b1**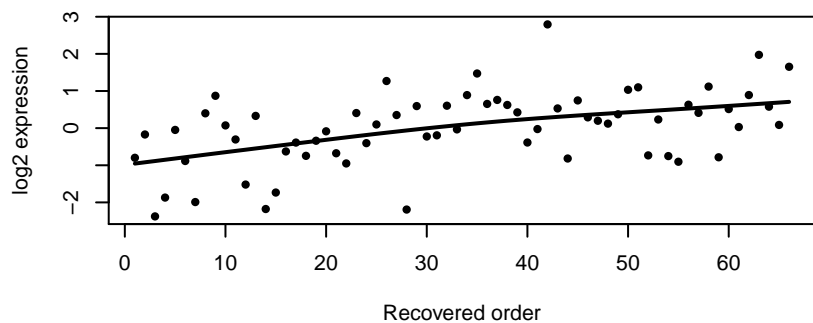**Cyp2a22**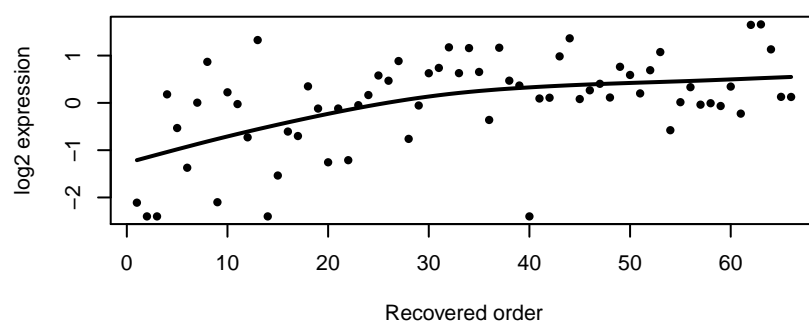**Foxq1**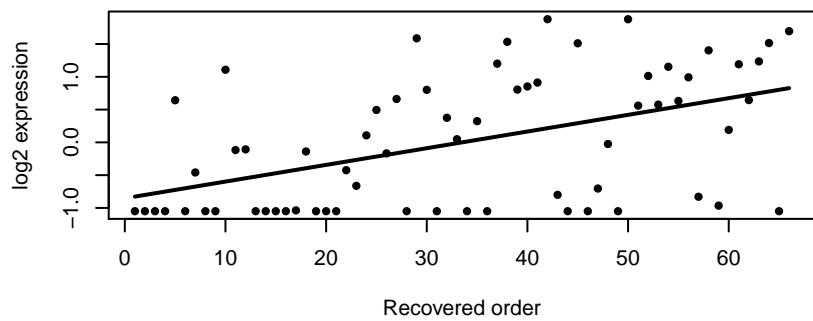**Tgln1**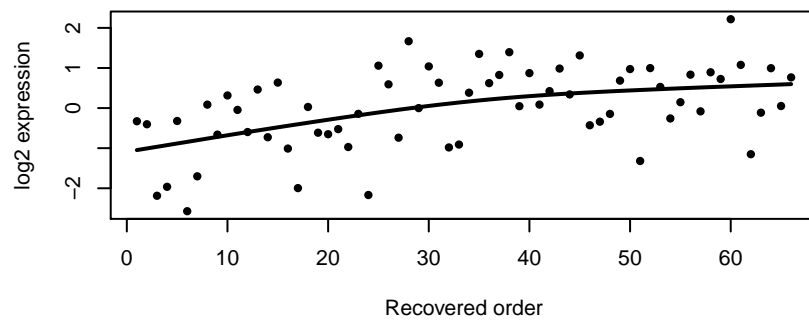**Trib1**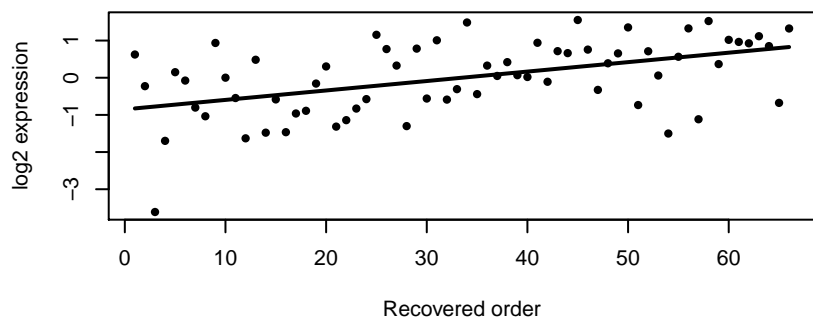**Veph1**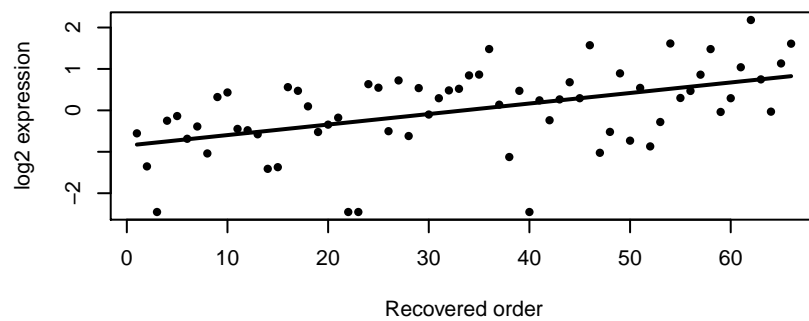**Gjb1**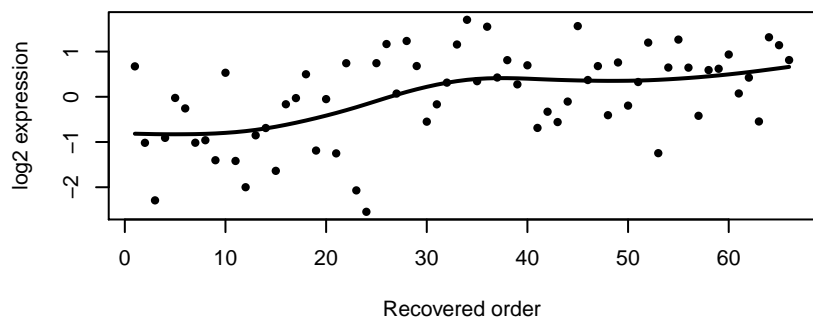**Jund**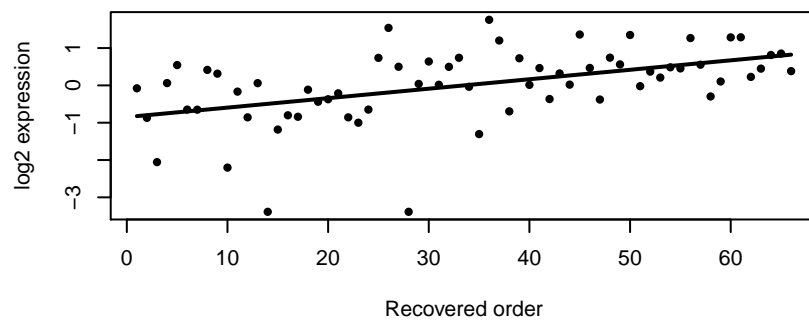**Jun**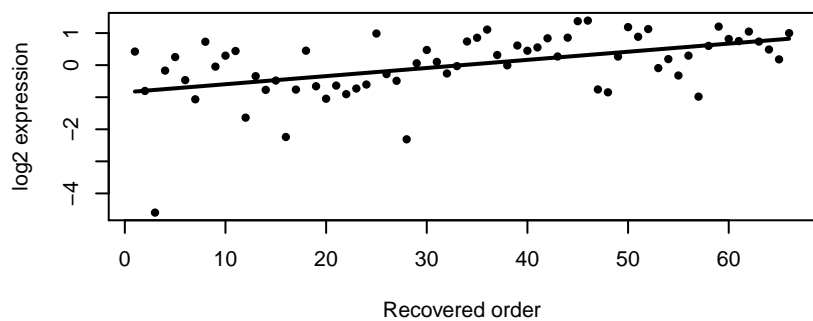**Smoc1**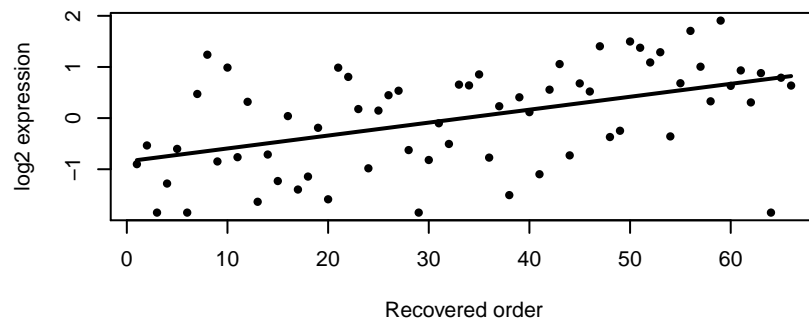

**Serpina1e**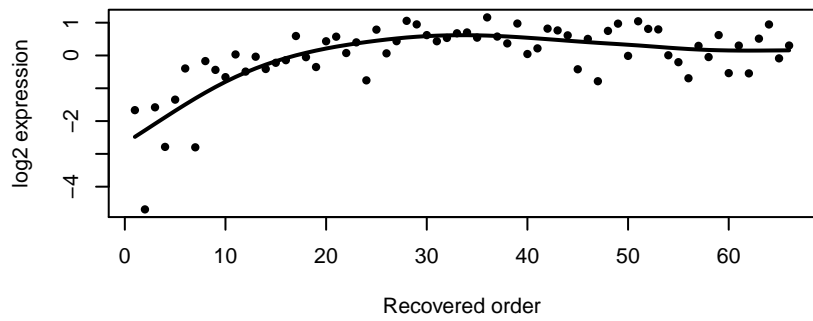**Ak2**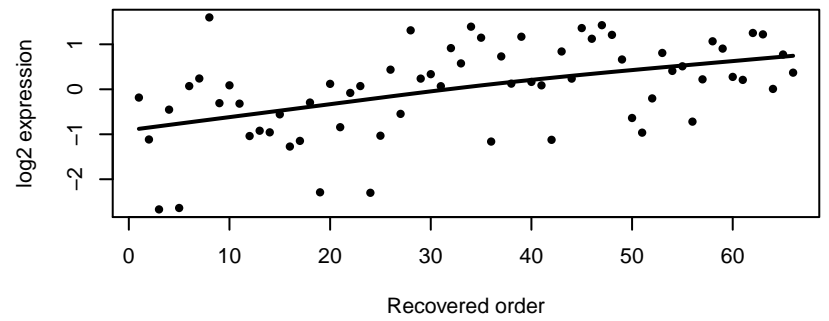**4430402I18Rik**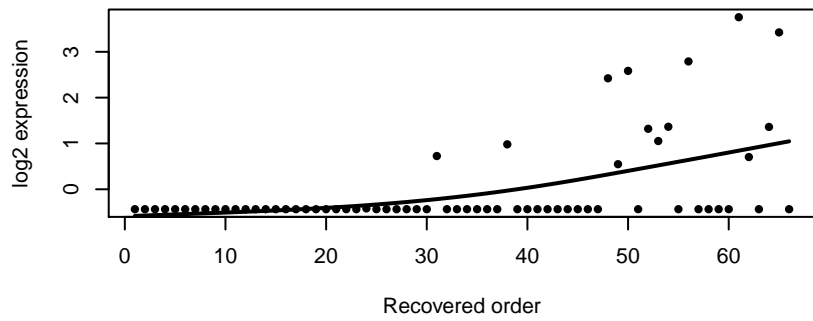**Pter**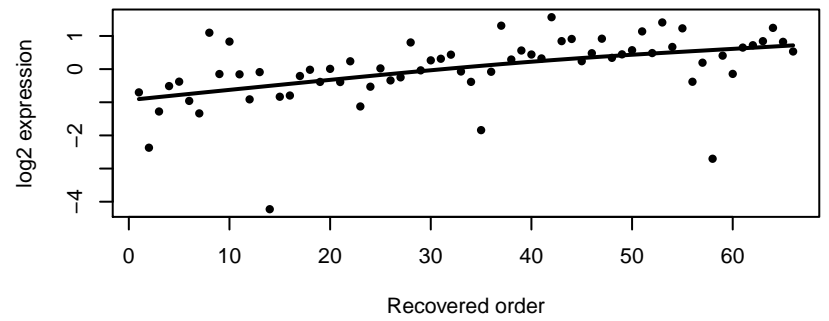**Psen2**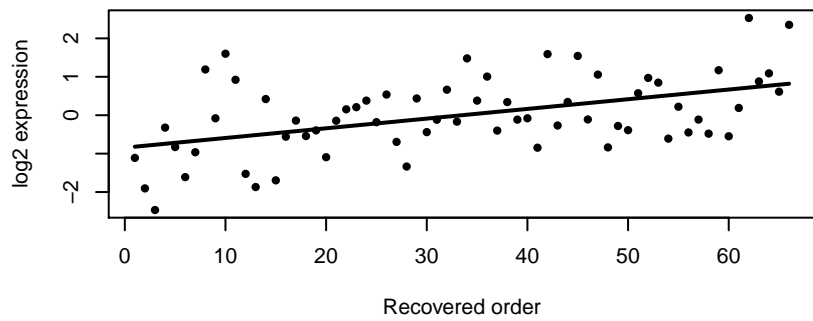**H2-K1**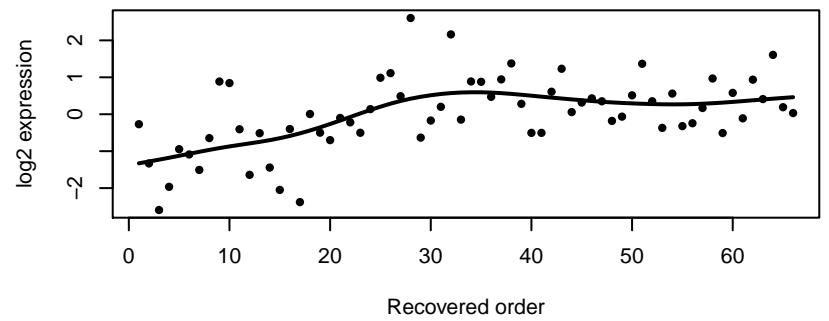**Fgfr2**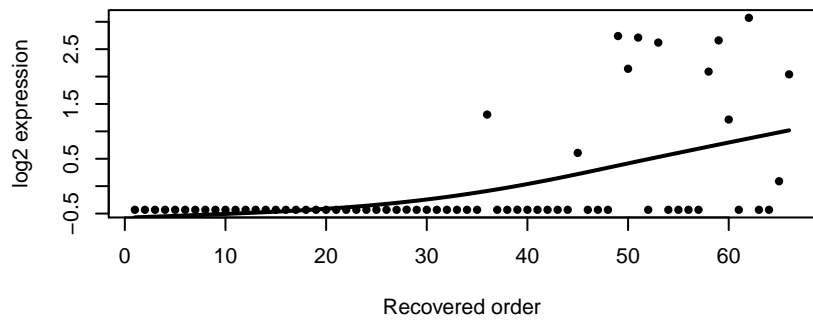**Sult1d1**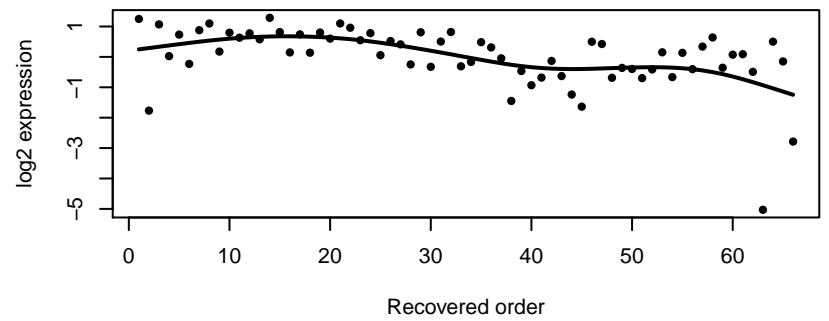**Sptan1**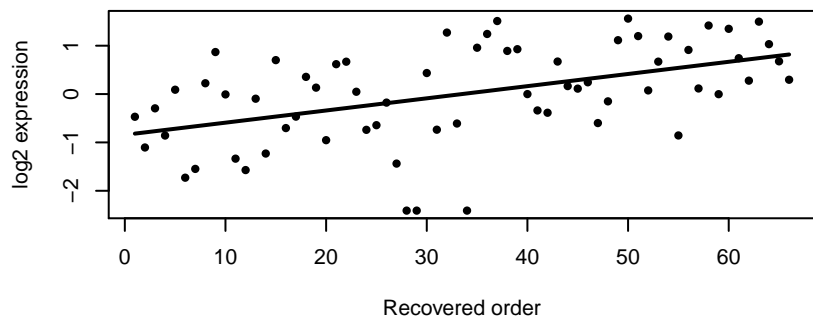**Cyp2c55**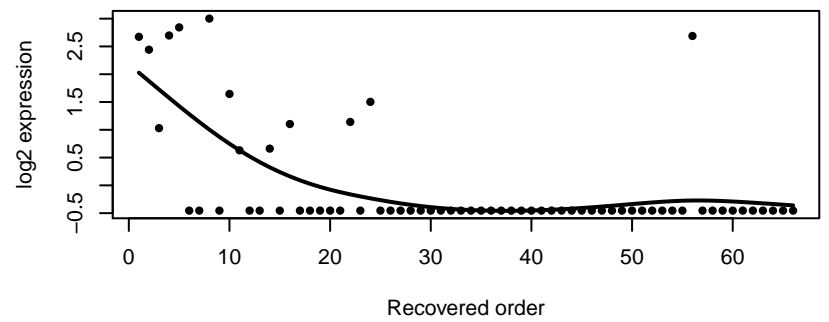



**Mycn**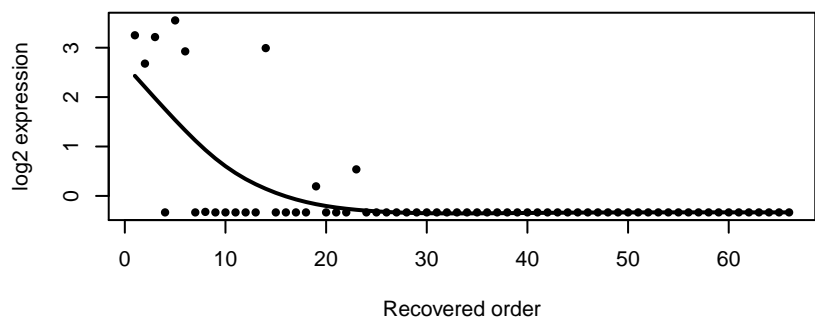**Cxcl1**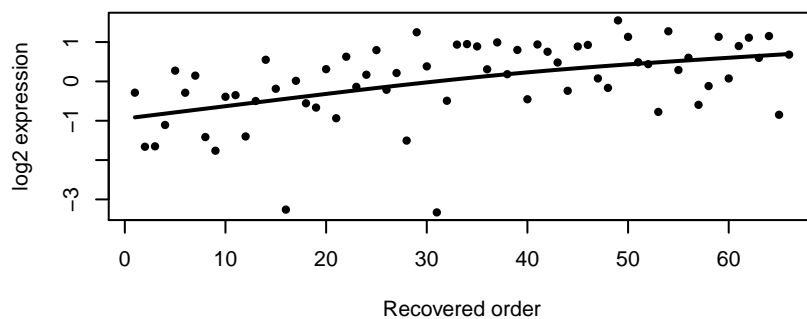**Cfb**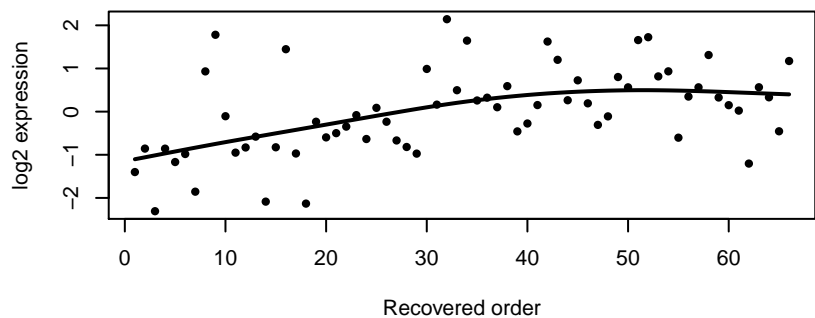**Rnase4**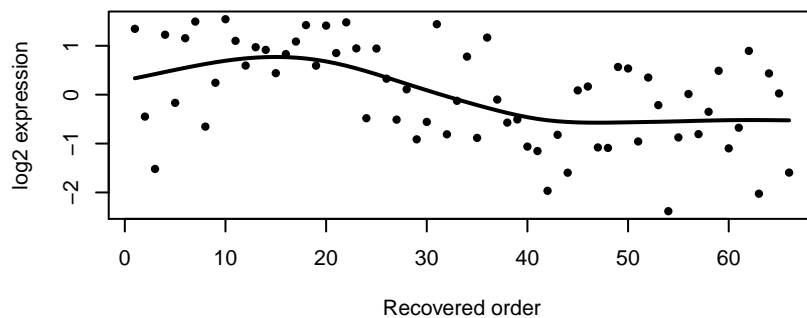**Ppib**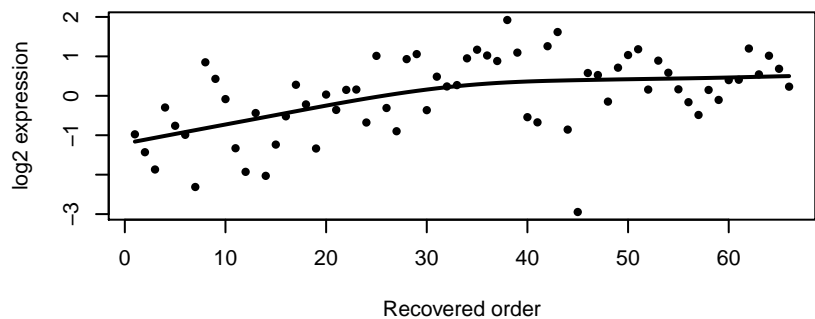**Myl12b**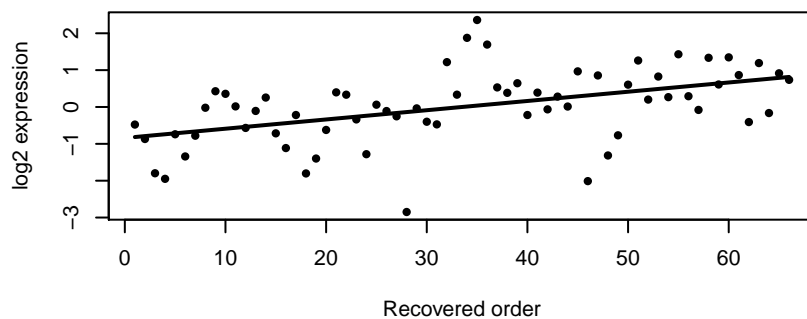**Mt1**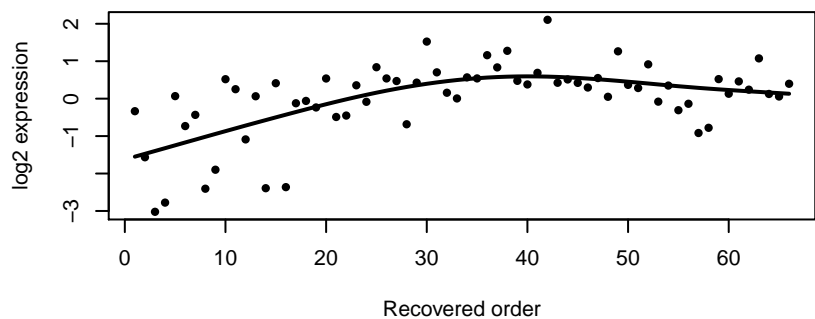**Krt18**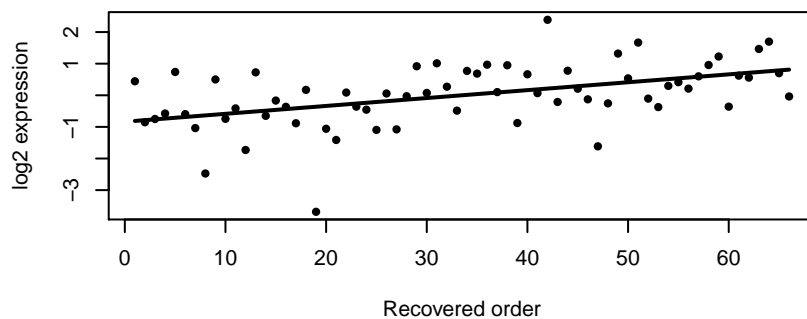**Hrg**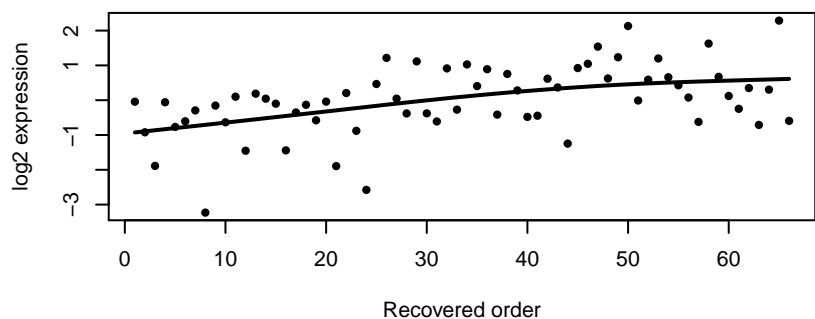**Spcs2**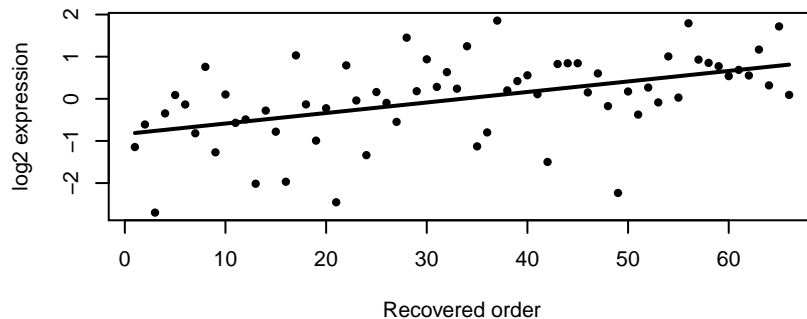

**Cpb2**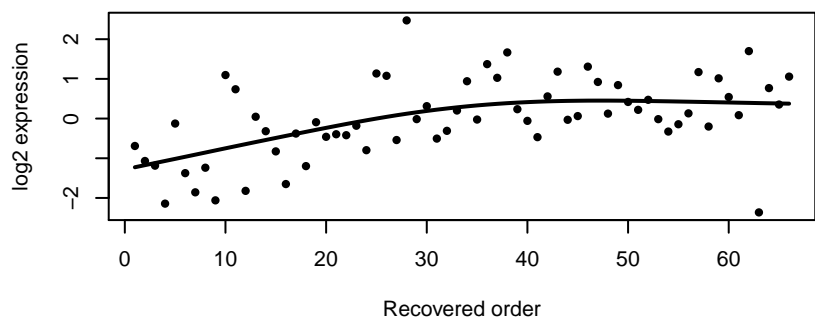**Snx19**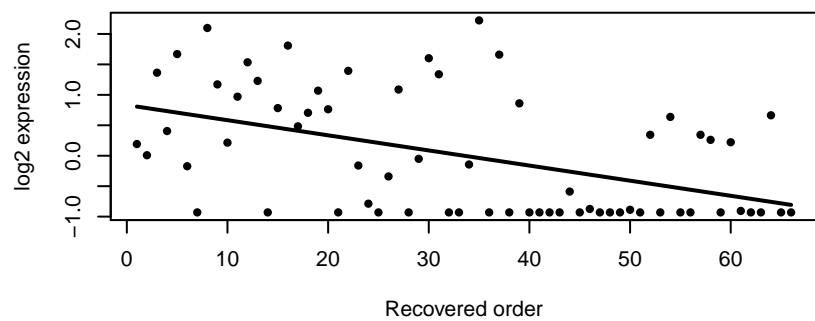**Rnf150**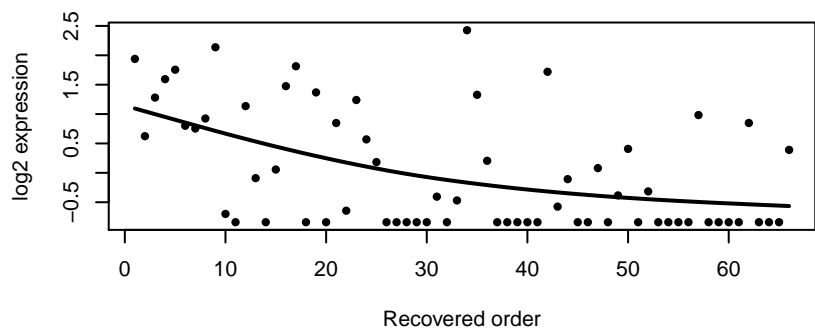**Ugt1a5**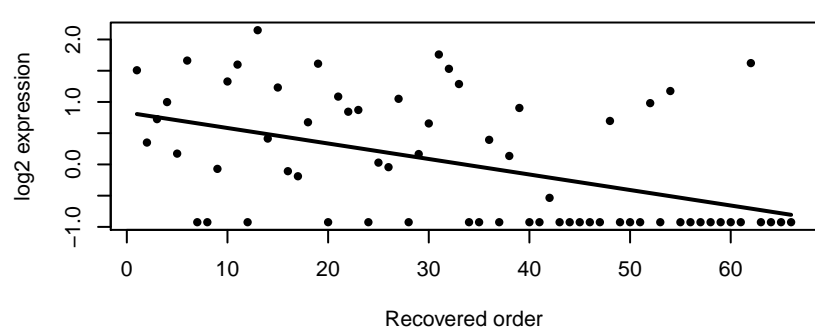**Ppia**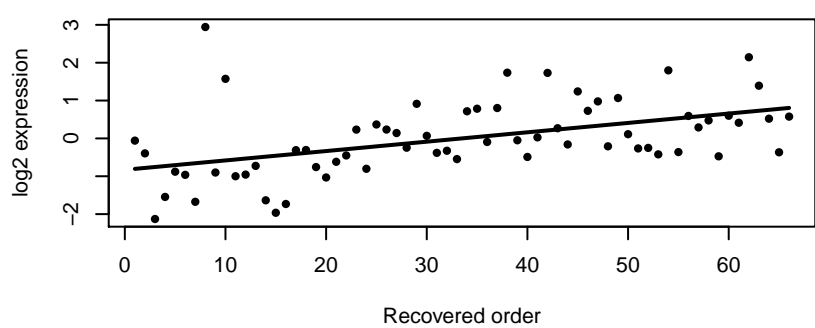**Sort1**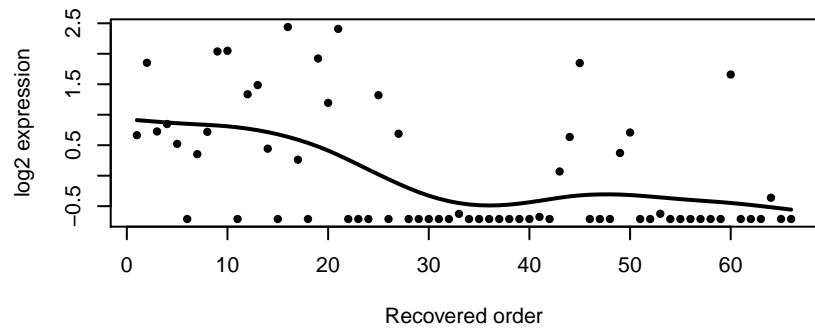**Creb3l3**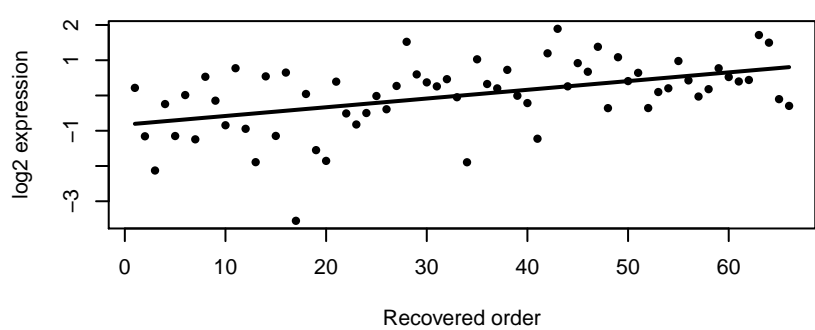**Prlr**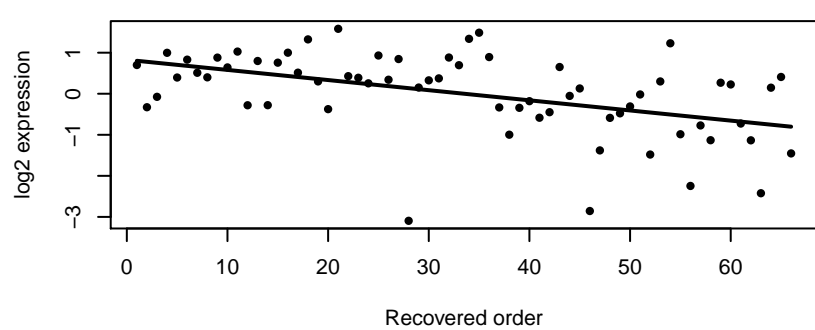**Ppa1**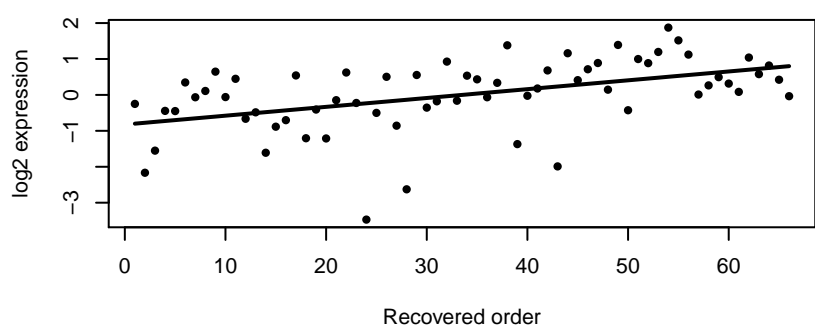**Ces3b**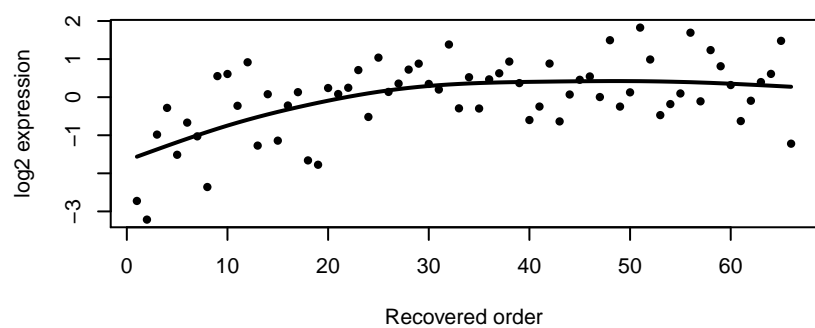

**Slc43a3**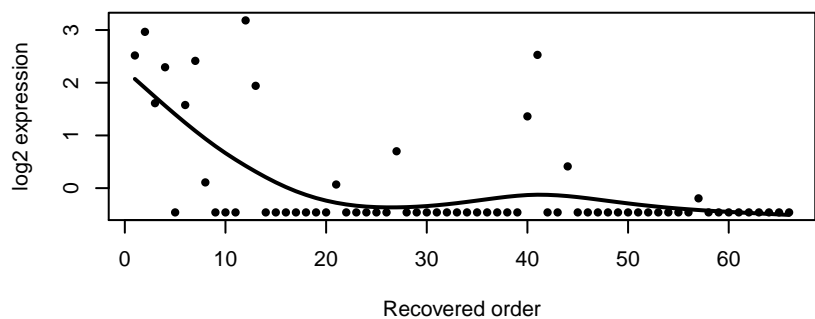**Tcn2**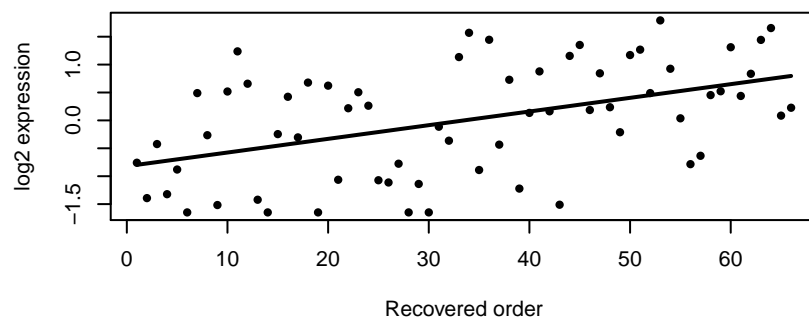**C3**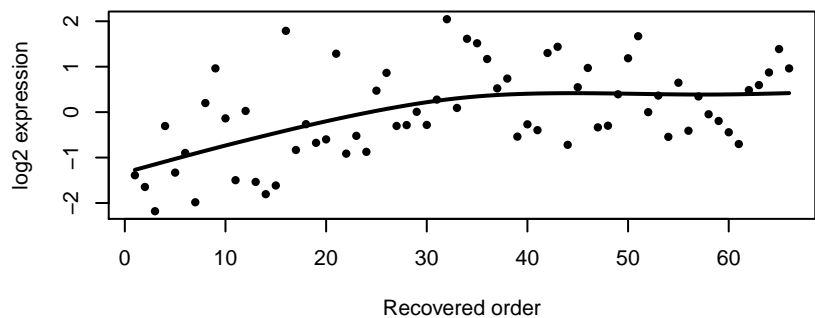**Gsto1**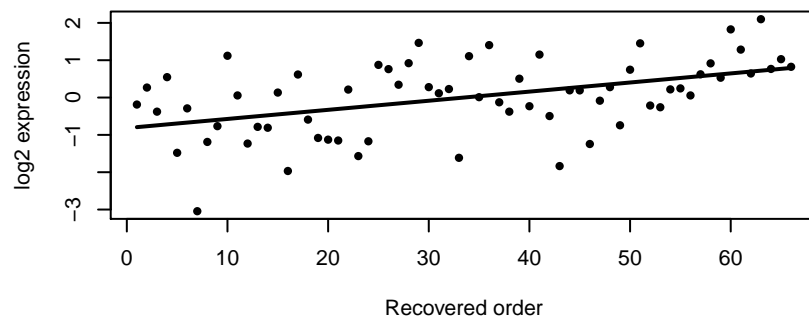**2010107E04Rik**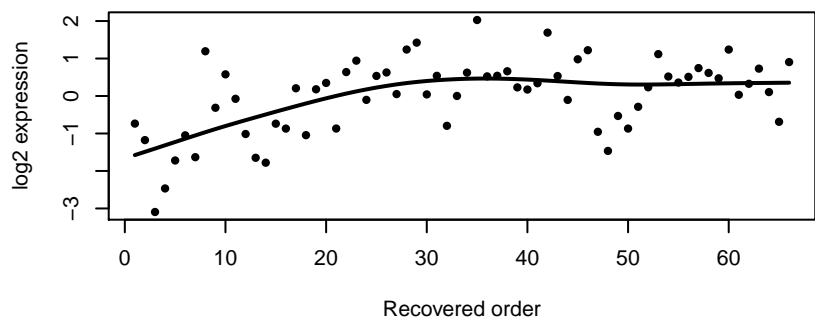**Tnfrsf19**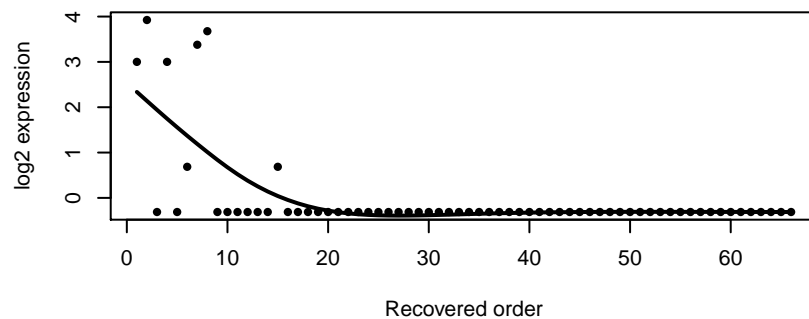**Amy1**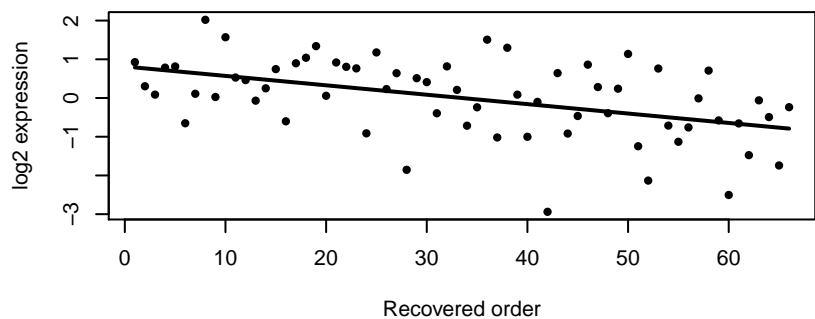**Rcan2**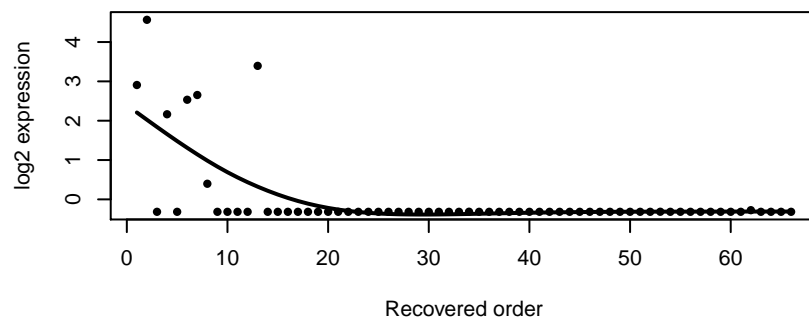**Cox7b**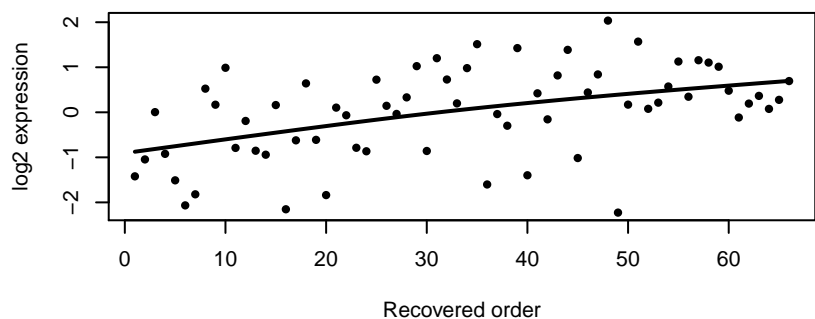**F2**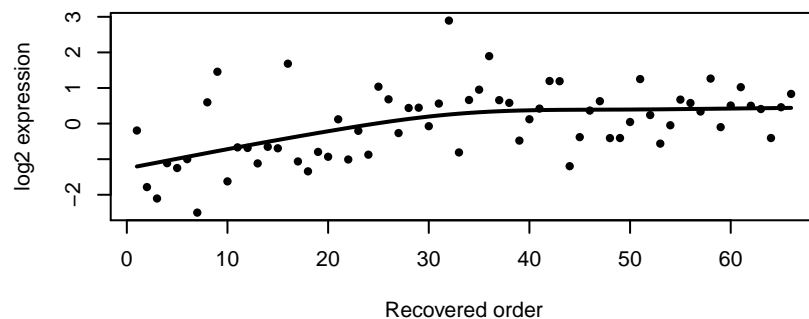

**Comt**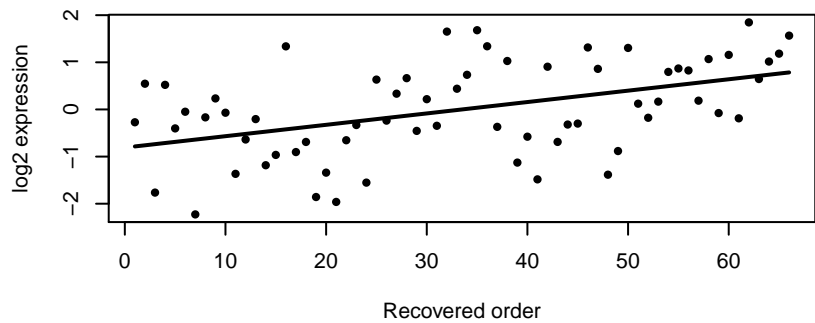**Serpina3k**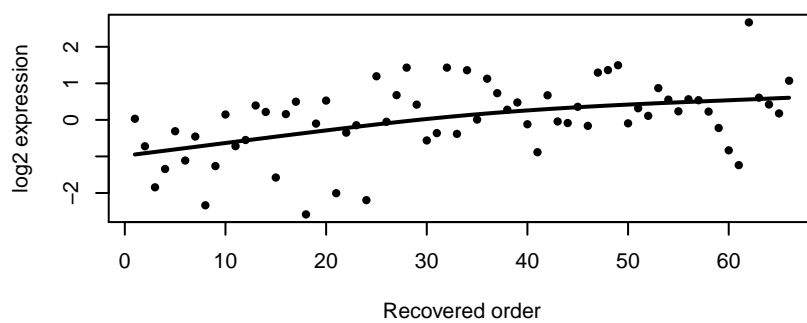**Cadm1**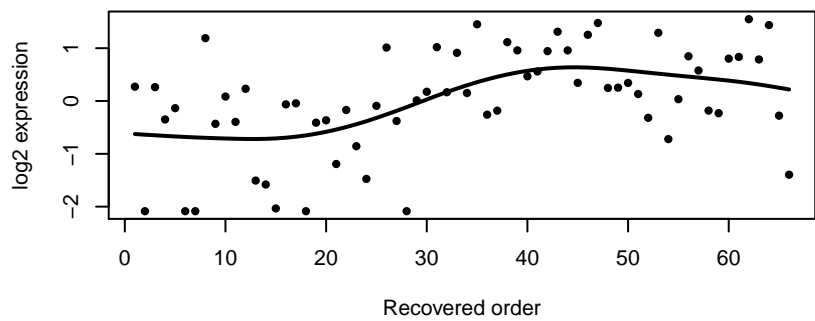**Ang**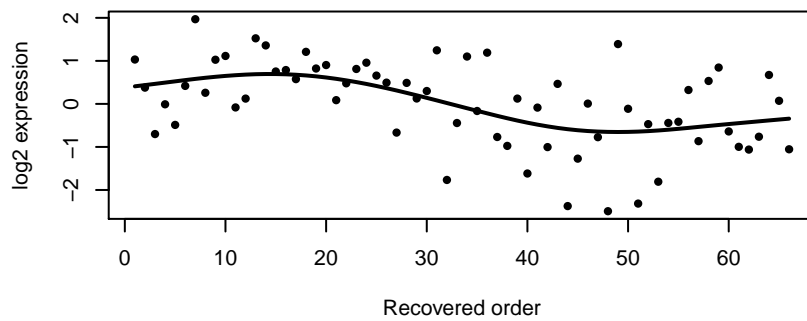**Chmp2a**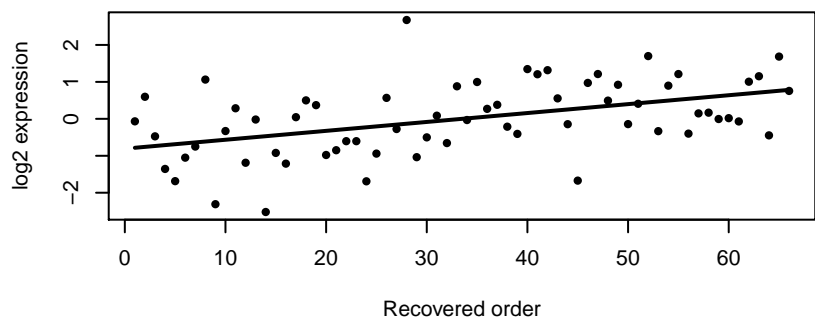**6430573F11Rik**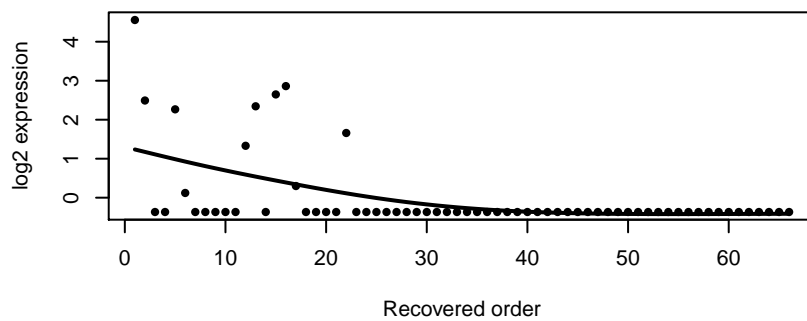**Pdk4**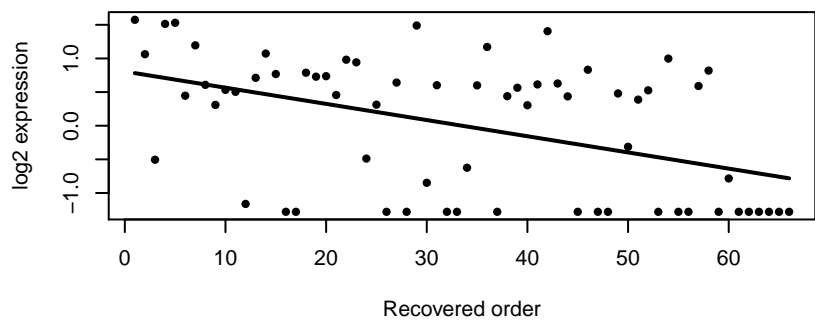**Senp7**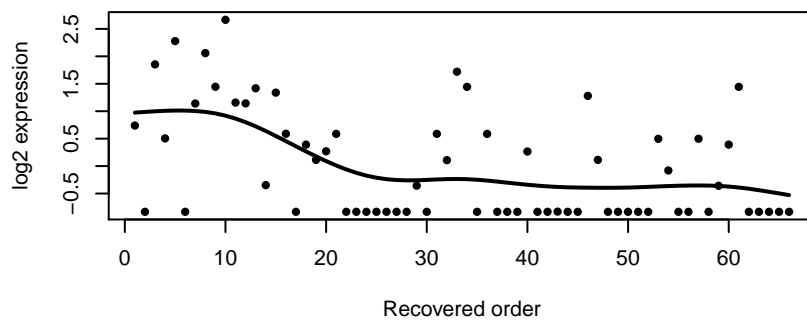**Slc22a23**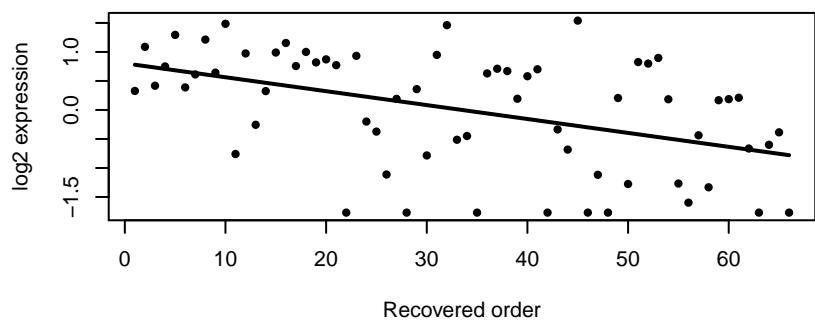**Insig1**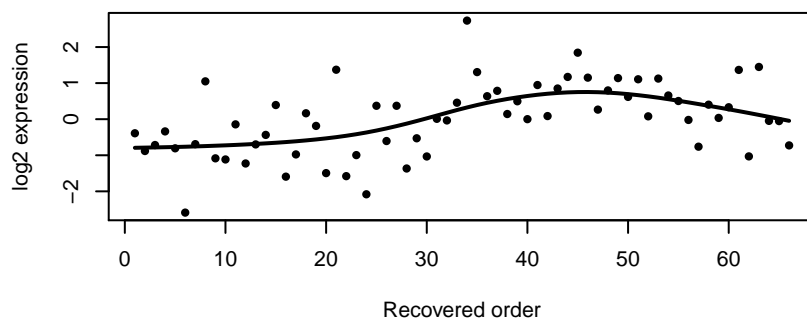

**Tox**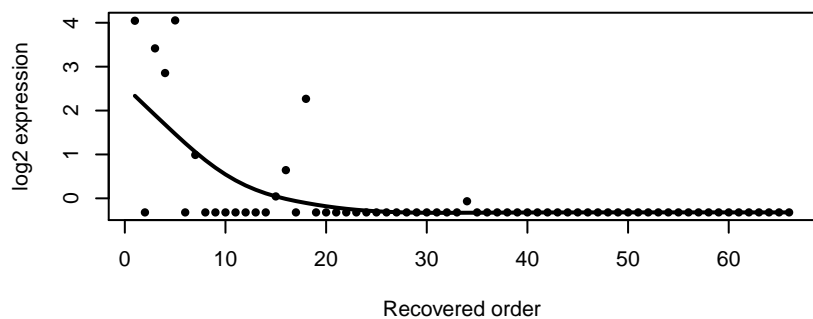**Hip1r**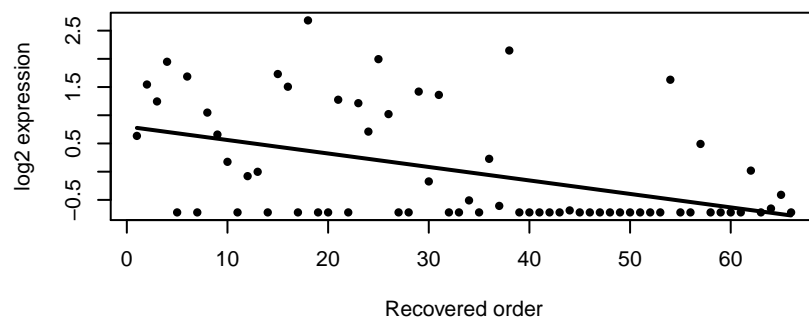**Mup1**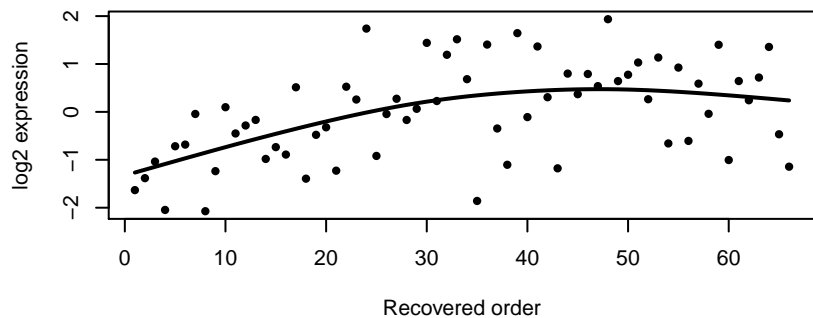**Mup13**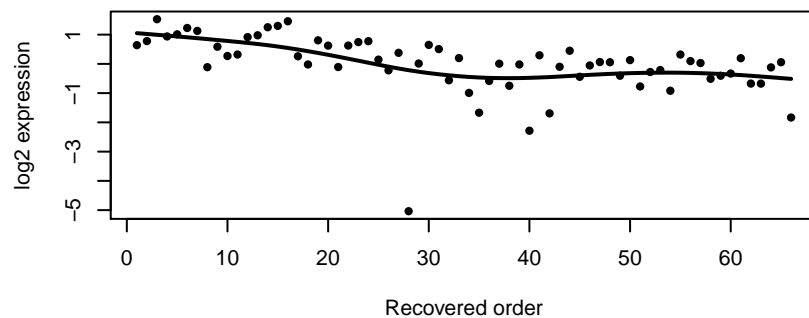**Mup14**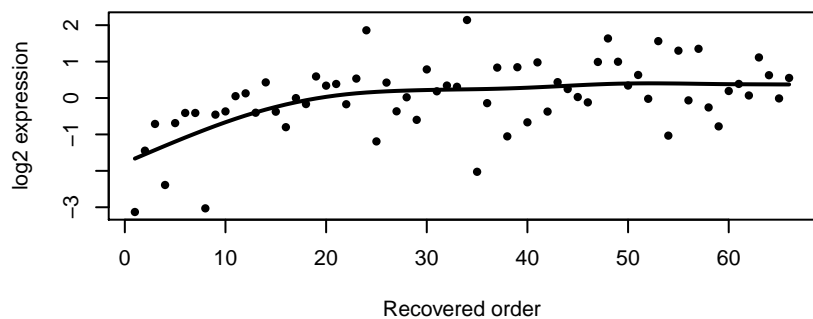**Nfia**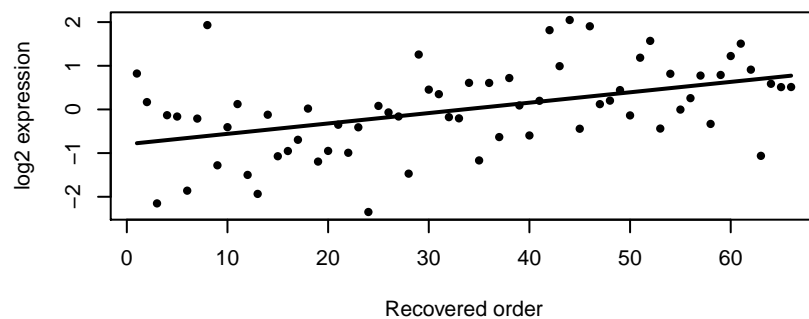**Csrp3**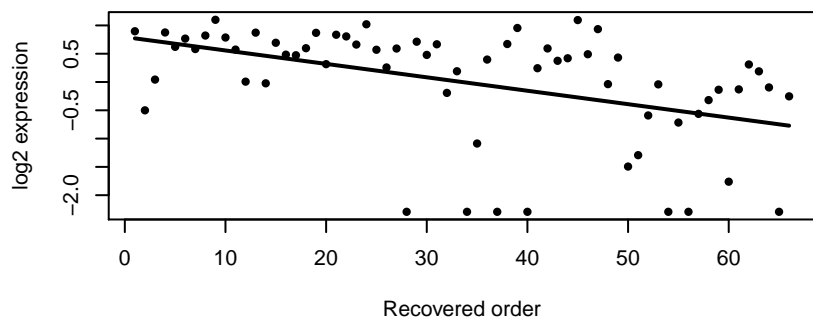**Cs**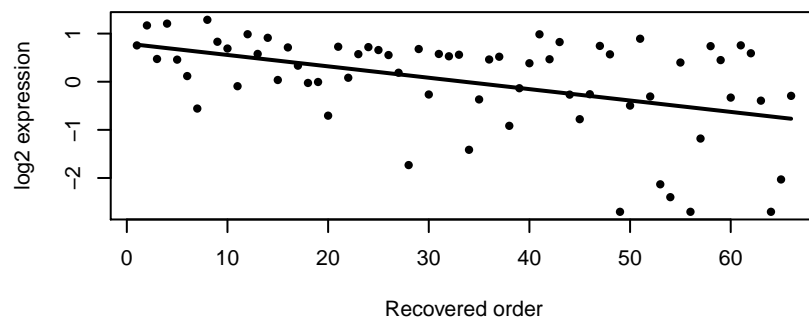**B4galt5**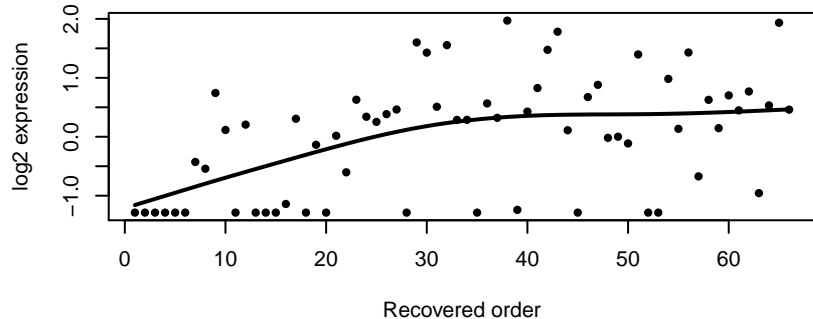**Hspa8**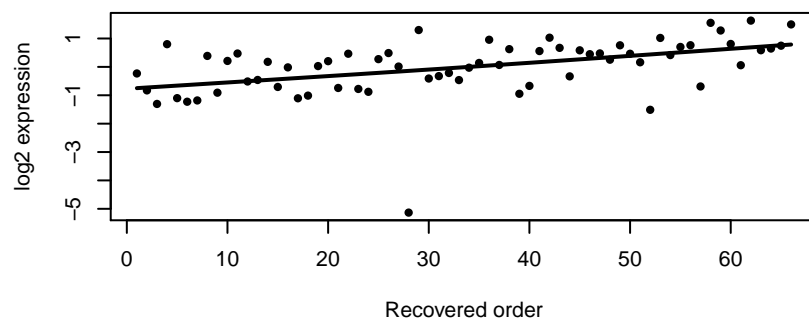

**Gstm1**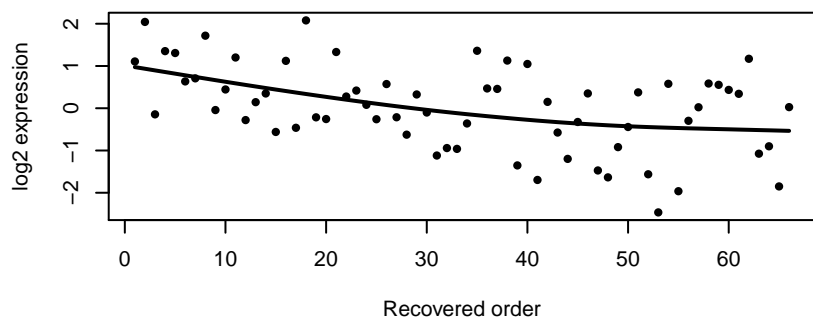**Rassf3**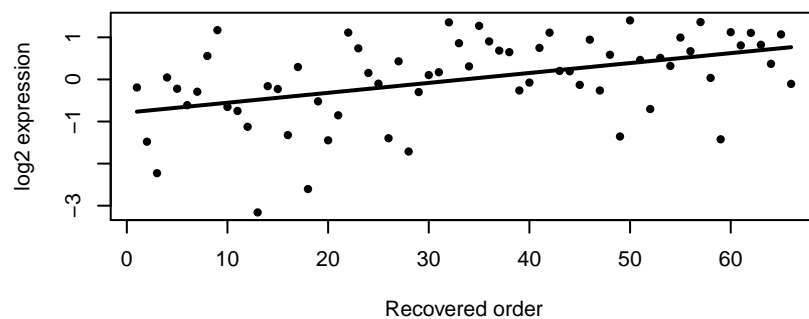**Pzp**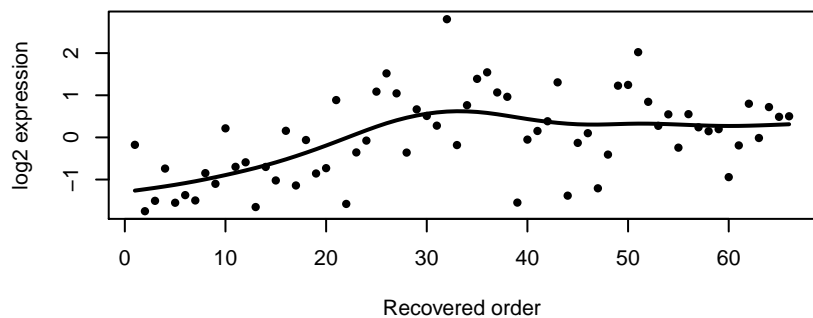**Arhgap11a**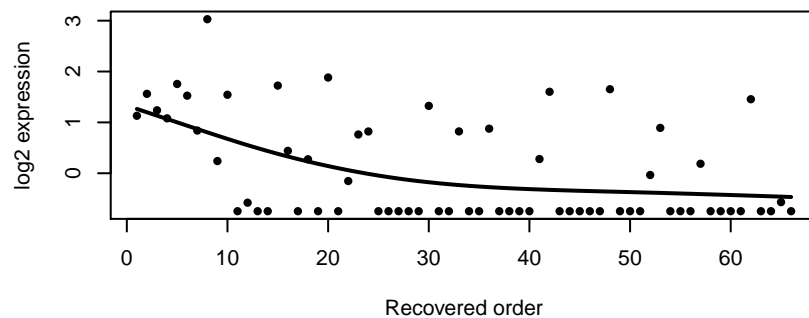**Notum**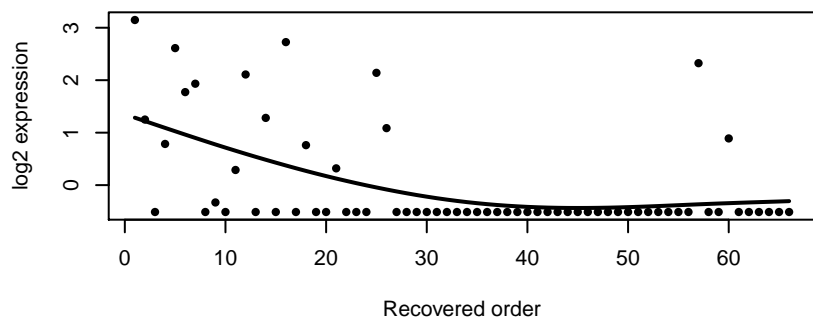**Btg2**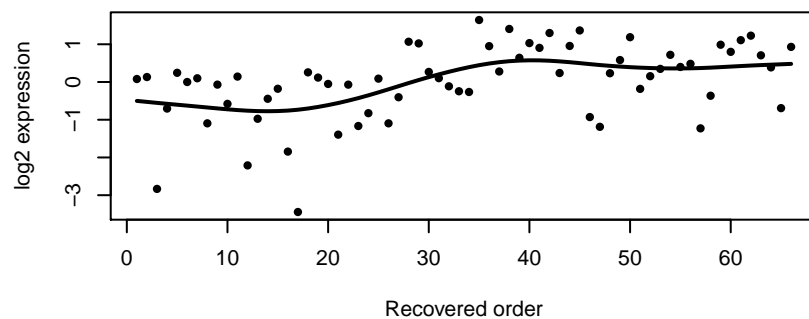**Ept1**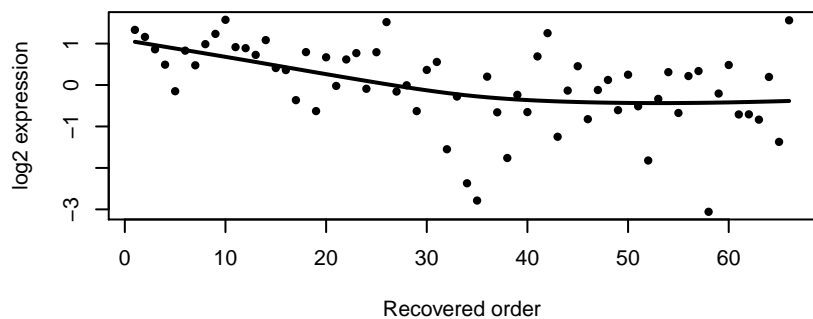**Cps1**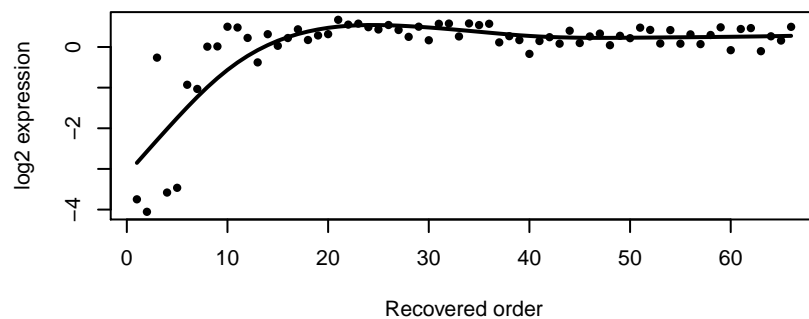**C8b**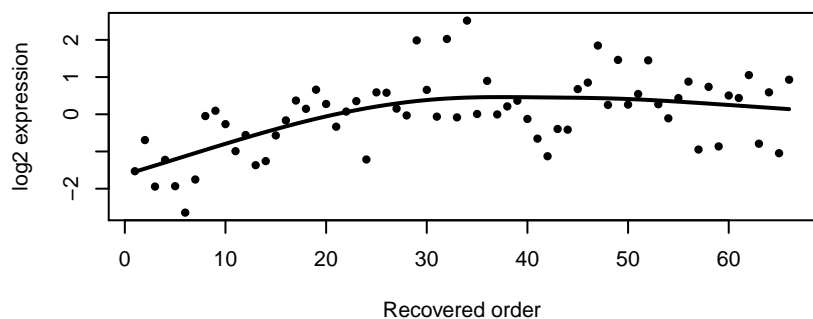**Mfsd2a**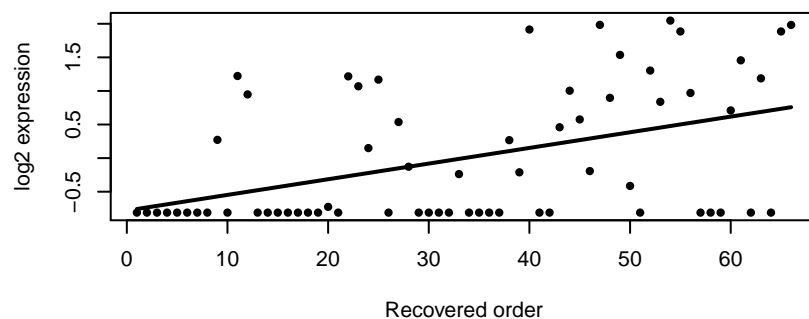

**Cyb5r3**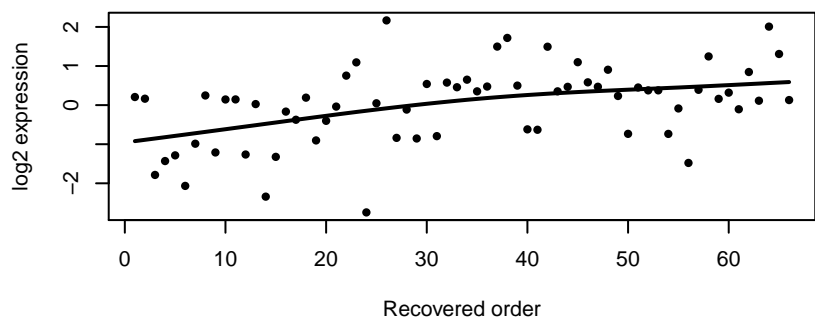**Arhgap26**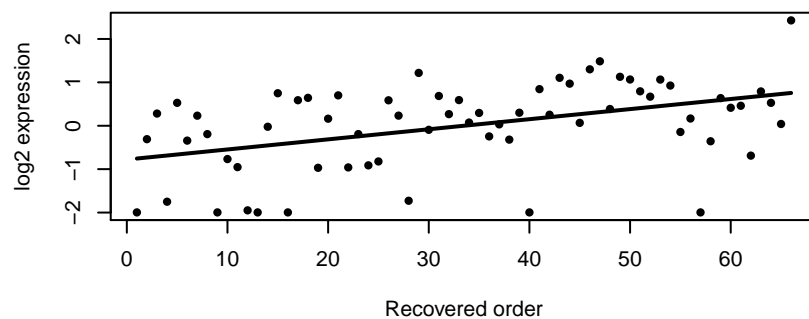**Eif1**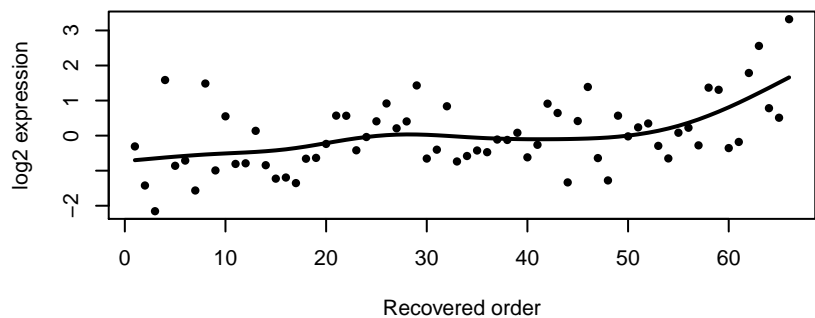**Ndufa1**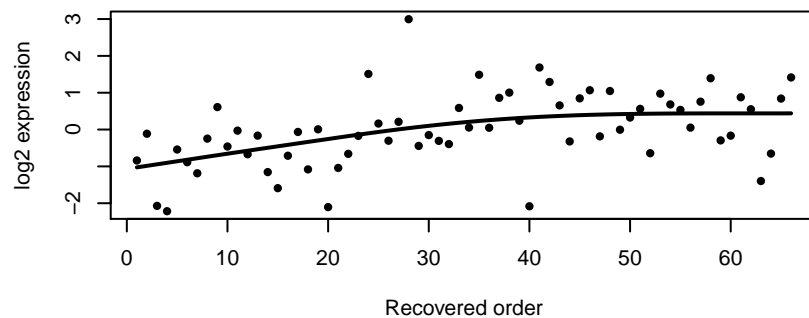**Usp22**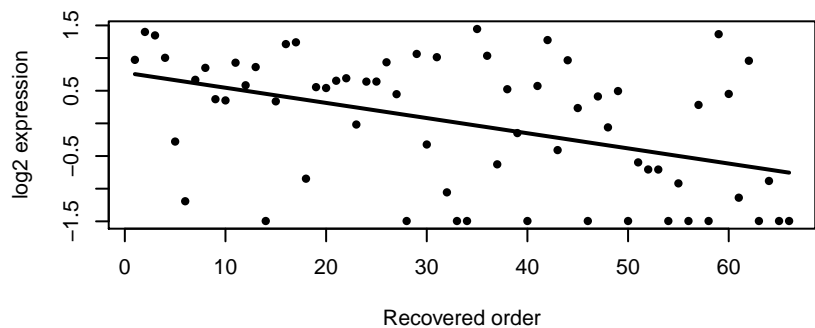**Ndufa2**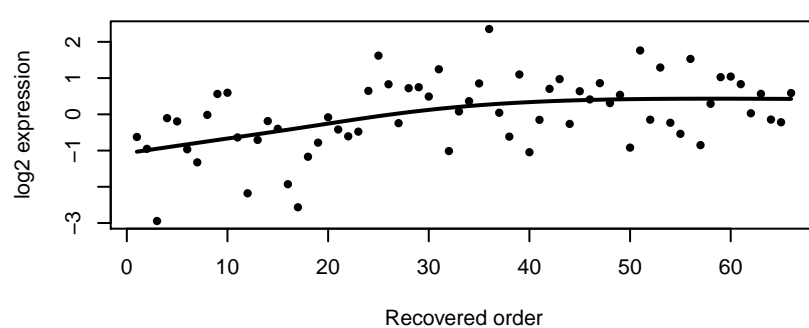**Foxp1**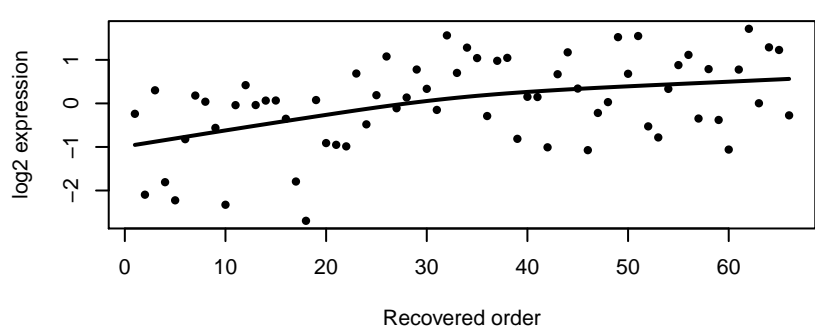**Cyp2c39**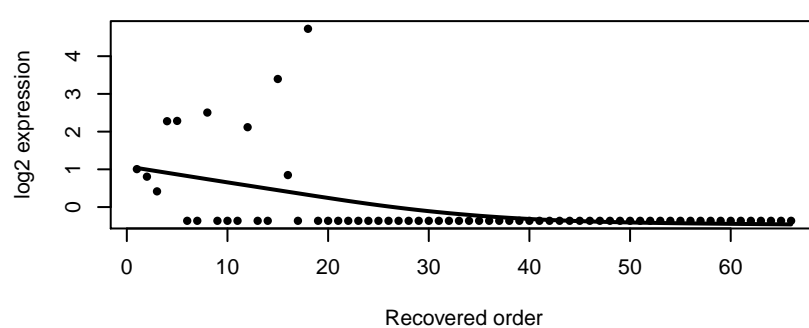**Ces1g**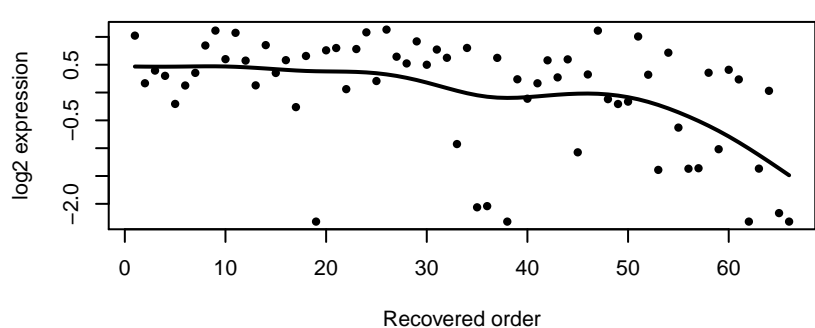**Slc25a21**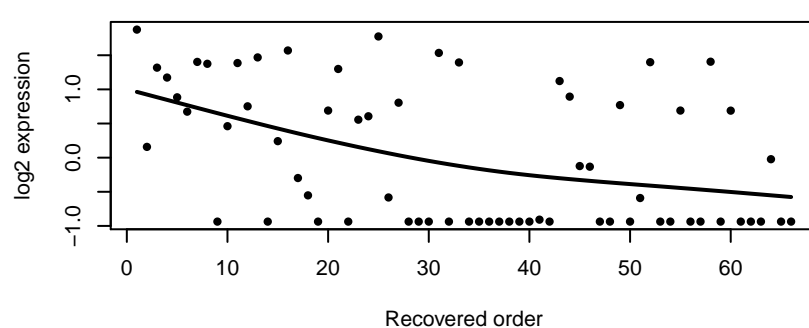

**110001G20Rik**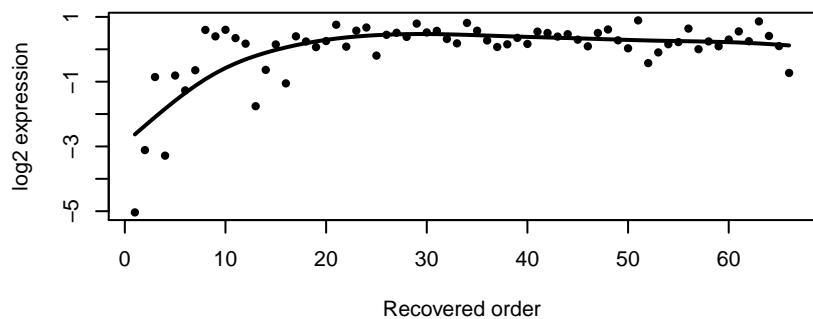**Pdia6**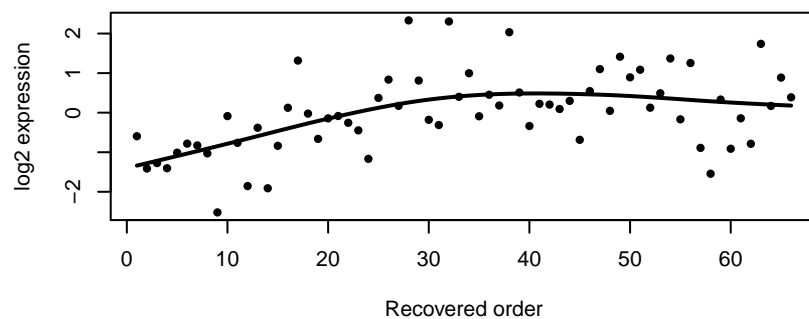**Smim1**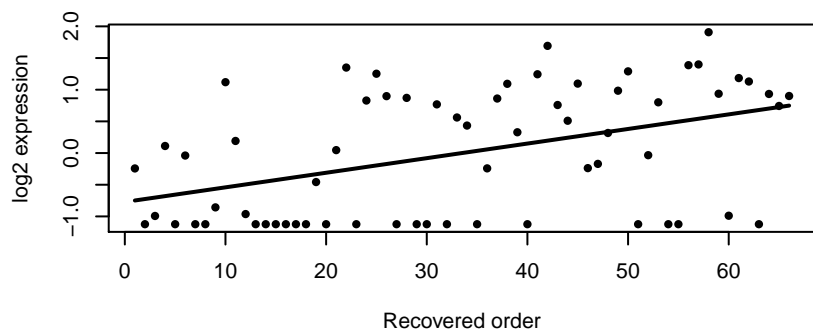**Cox6c**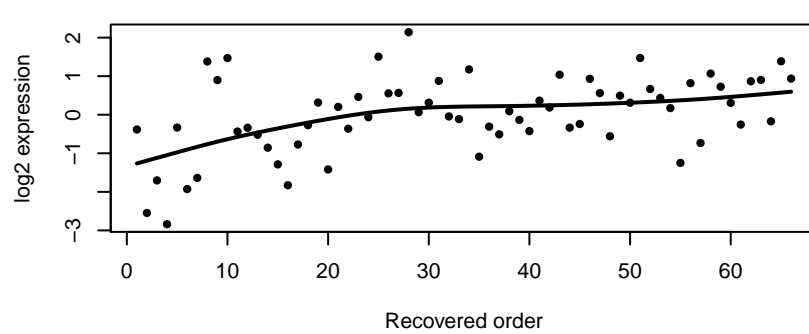**Fst**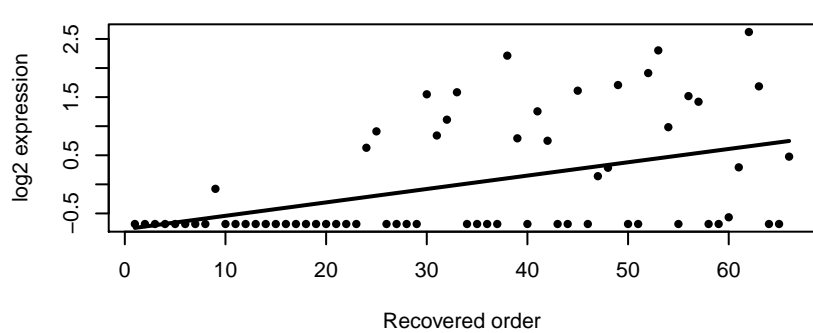**Plg**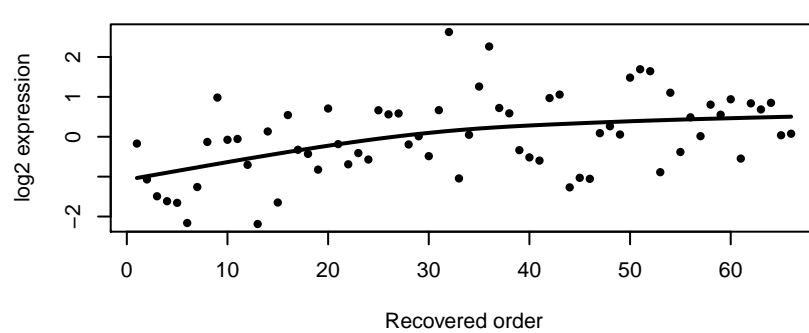**Fabp2**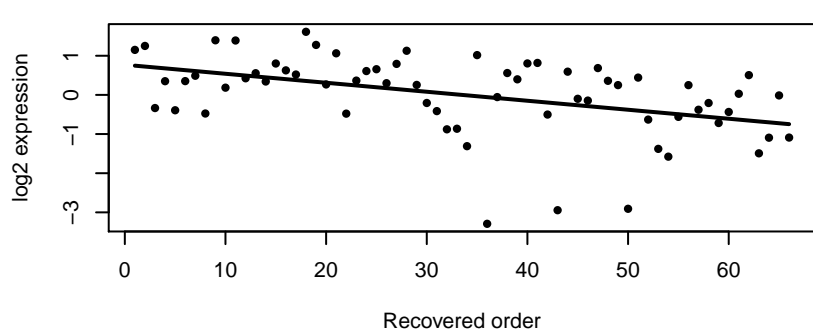**Ceacam1**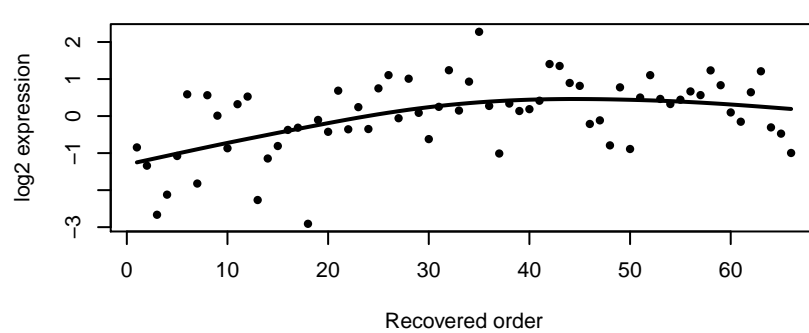**Cyp2c44**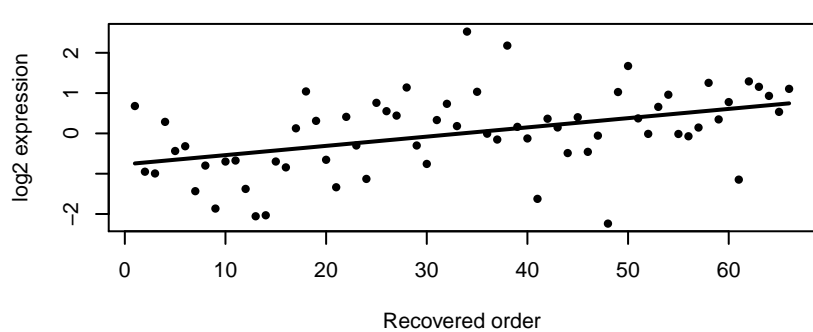**Dbf4**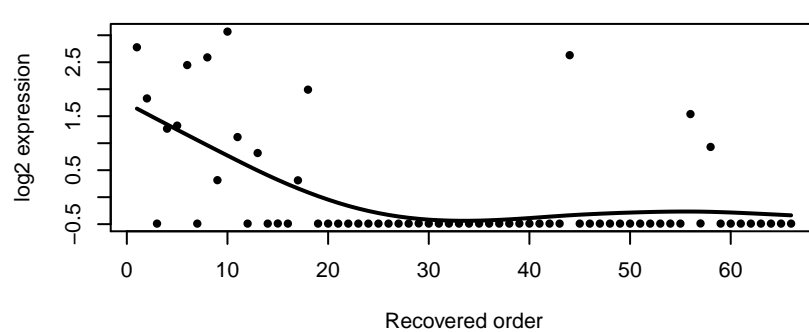



**Ctsz**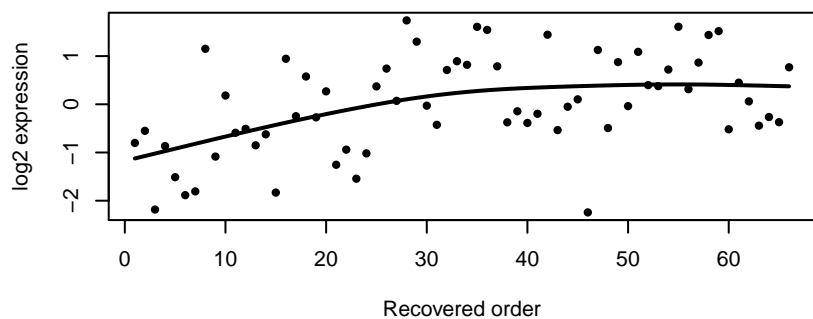**Eef1a1**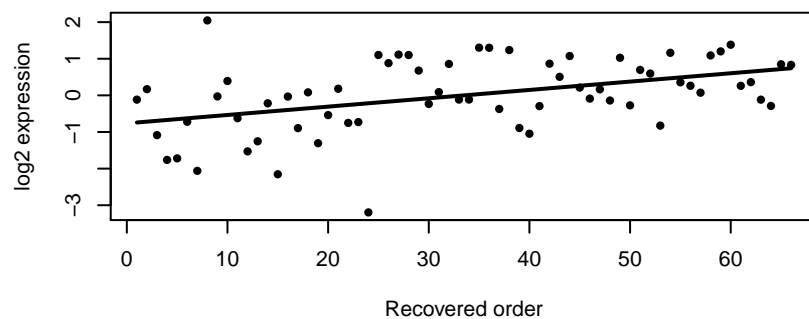**Tmed10**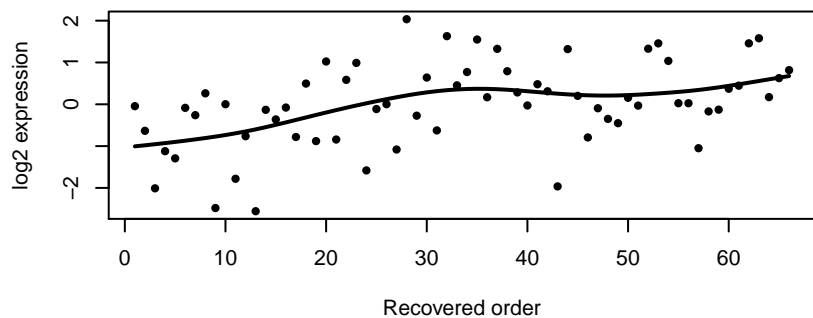**Mrpl50**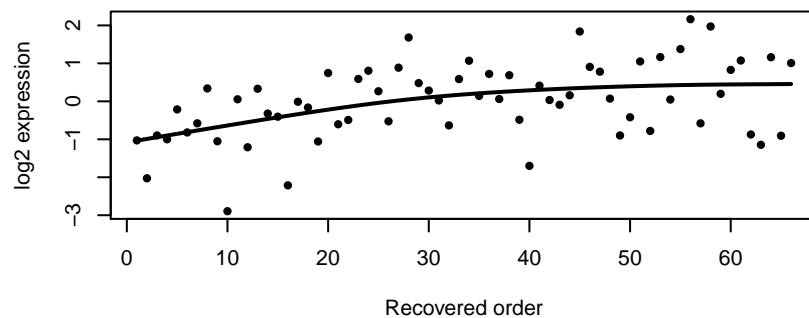**Tcf7l1**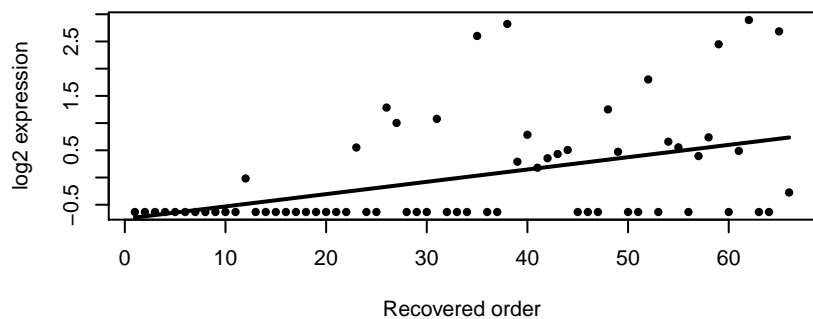**Tpm2**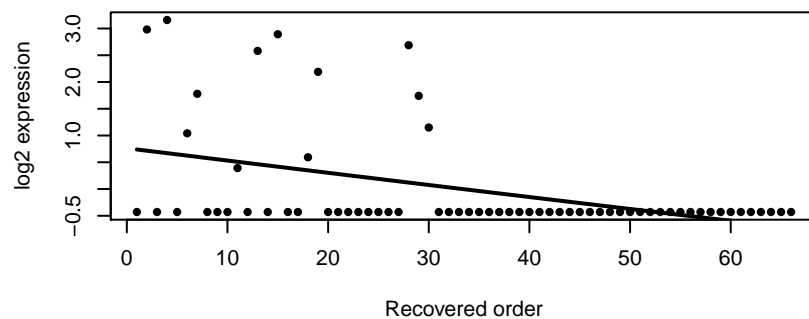**Slc16a11**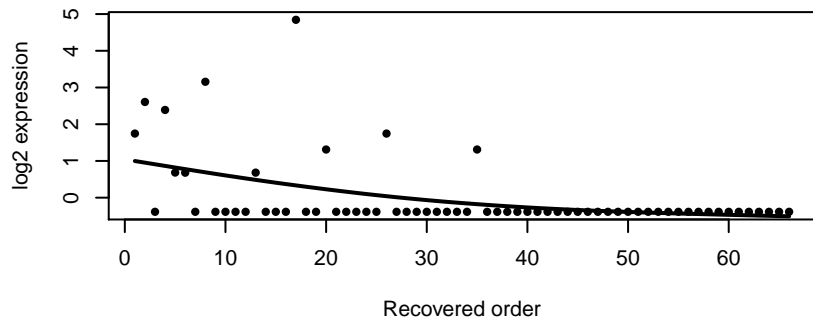**Khk**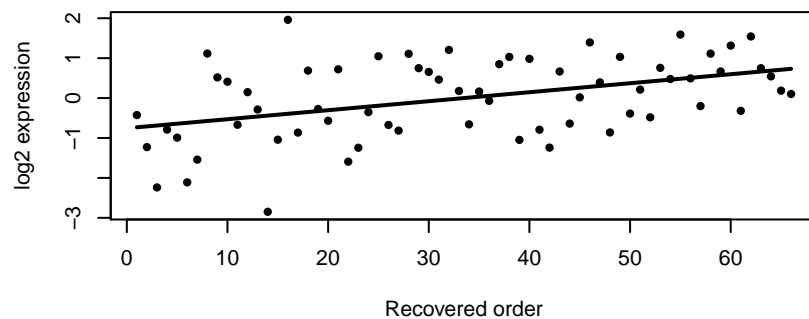**Atp5b**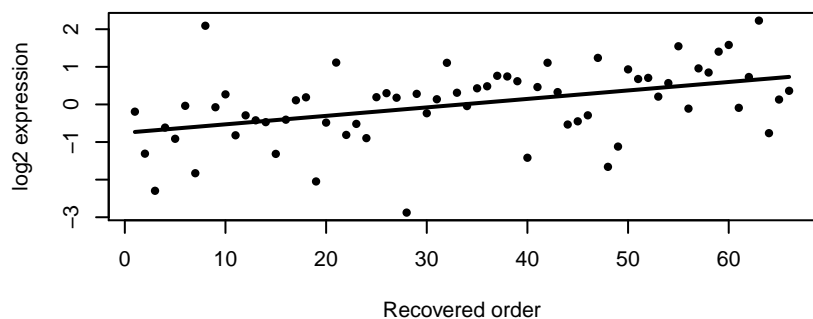**Atp5k**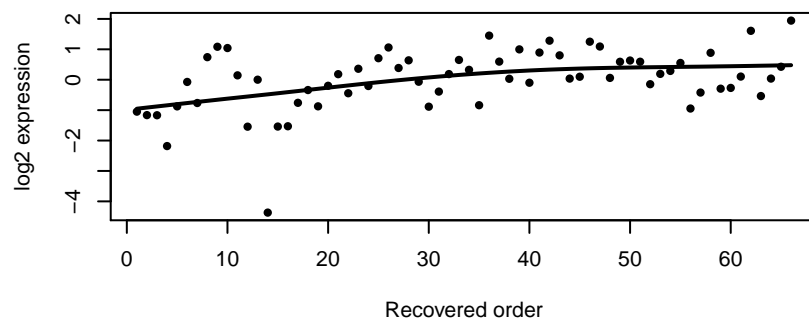

**Rrbp1**

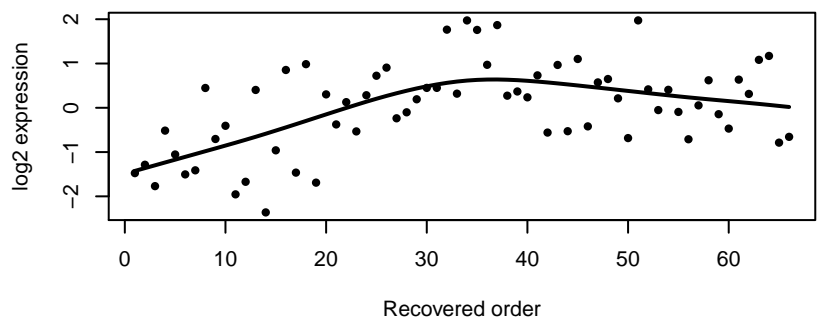

**Hes1**

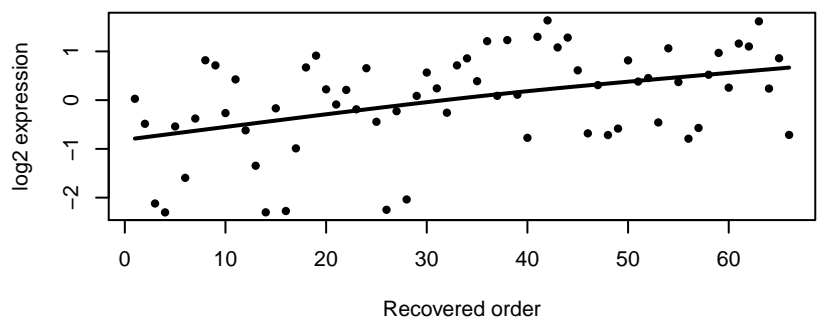

Supplement: pone.0239711.s009.pdf [file pone.0239711.s009.pdf]
