# Supplementary material for: Reproducibility across single-cell RNA-seq protocols for spatial ordering analysis
Source: PubMed Central journal article supplement (PMC7521718; doi:10.1371/journal.pone.0239711), 2020-09-28

# Cell ordering

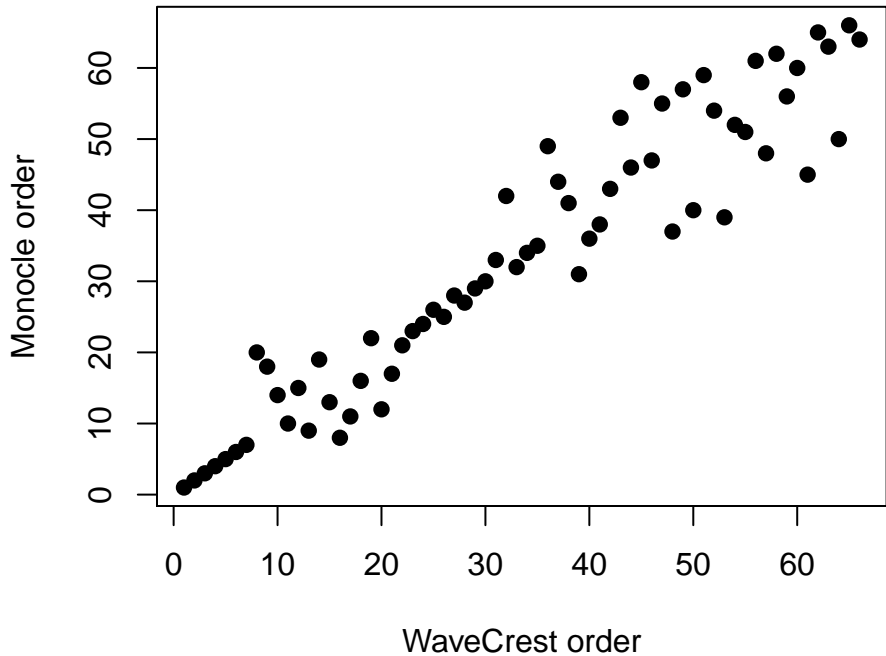

Supplement: pone.0239711.s002.pdf [file pone.0239711.s002.pdf]
