# Supplementary material for: Reproducibility across single-cell RNA-seq protocols for spatial ordering analysis
Source: PubMed Central journal article supplement (PMC7521718; doi:10.1371/journal.pone.0239711), 2020-09-28

**Ugt1a1**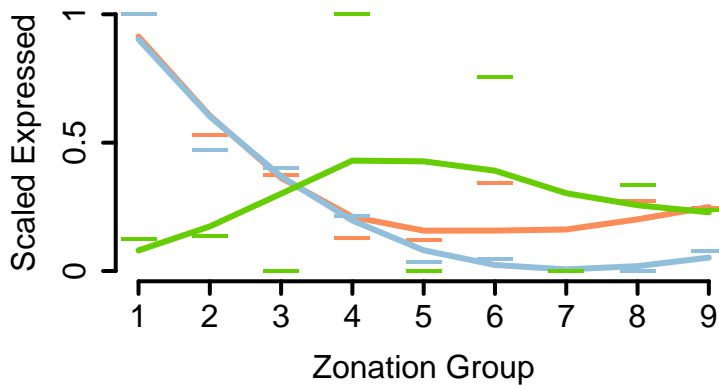**Ugt1a10**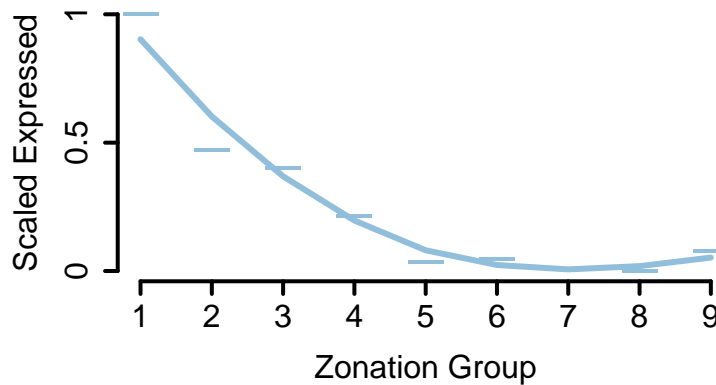**Ugt1a2**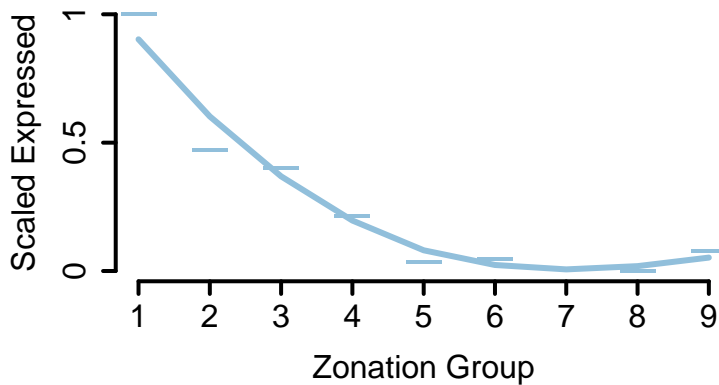**Ugt1a5**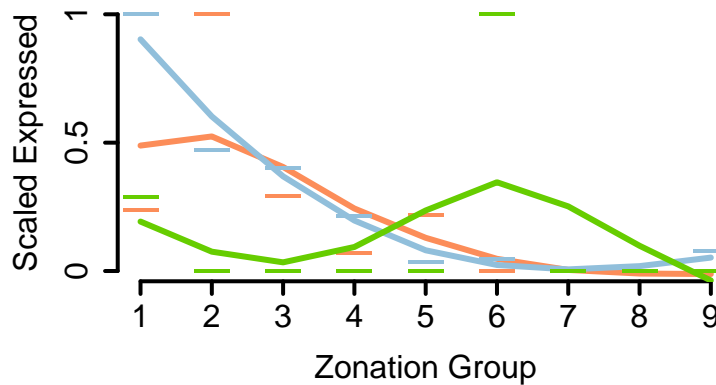**Ugt1a6a**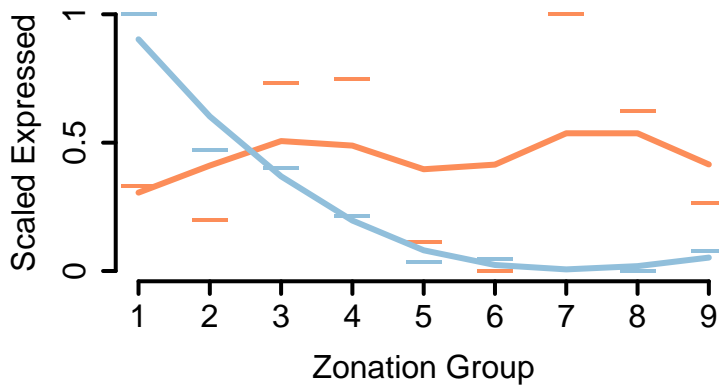**Ugt1a6b**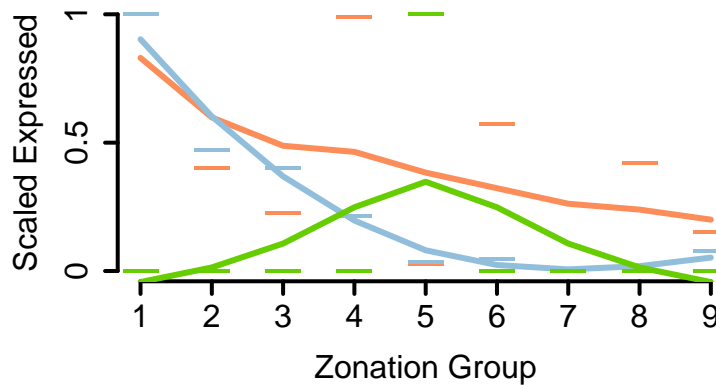**Ugt1a7c**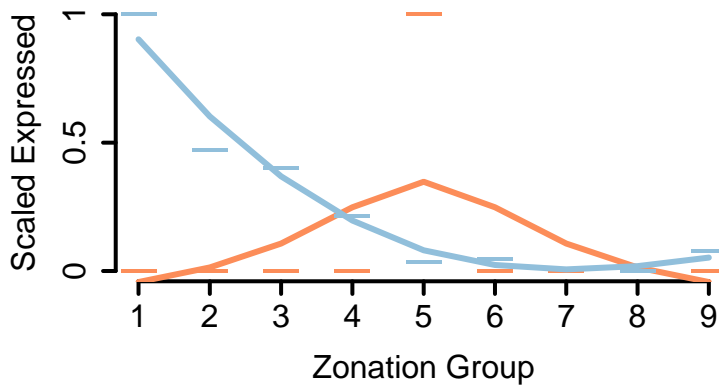**Ugt1a9**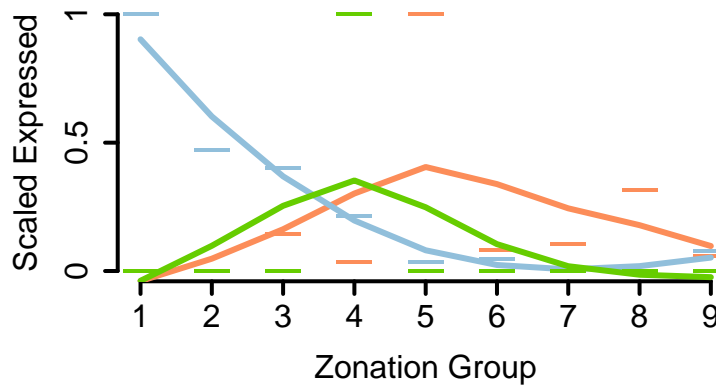

Supplement: pone.0239711.s006.pdf [file pone.0239711.s006.pdf]
